# Supplementary material for: METTL3 Induces AAA Development and Progression by Modulating N6-Methyladenosine-Dependent Primary miR34a Processing
Source: PubMed Central journal article supplement — Mol Ther Nucleic Acids. 2020 Jun 10;21:394–411. doi: 10.1016/j.omtn.2020.06.005 (PMC7347714; doi:10.1016/j.omtn.2020.06.005), 2020-06-10
Supplement: mmc1.pdf [file mmc1.pdf]

OMTN, Volume 21

## **Supplemental Information**

**METTL3 Induces AAA Development and Progression**

**by Modulating N6-Methyladenosine-Dependent**

**Primary miR34a Processing**

**Lintao Zhong, Xiang He, Haoyu Song, Yili Sun, Guojun Chen, Xiaoyun Si, Jie Sun, Xiaoqiang Chen, Wangjun Liao, Yulin Liao, and Jianping Bin**

**METTL3 induces abdominal aortic aneurysm development and progression by modulating N6-methyladenosine-dependent primary miR34a processing**

Lintao Zhong<sup>a,\*</sup>, MD, PhD; Xiang He<sup>a</sup>, MD, PhD; Haoyu Song<sup>a</sup>, MD, PhD; Yili Sun<sup>a</sup>, MD, PhD; Guojun Chen<sup>a</sup>, MD, PhD; Xiaoyun Si<sup>a</sup>, MD, PhD; Jie Sun<sup>a</sup>, MD, PhD; Xiaoqiang Chen<sup>a</sup>, MD; Wangjun Liao<sup>b</sup>, MD, PhD; Yulin Liao<sup>a</sup>, MD, PhD; Jianping Bin<sup>a,\*</sup>, MD, PhD

<sup>a</sup> State Key Laboratory of Department of Cardiology, Organ Failure Research, Nanfang Hospital, Southern Medical University, Guangzhou 510515, China;

<sup>b</sup> Department of Oncology, Nanfang Hospital, Southern Medical University, Guangzhou 510515, China

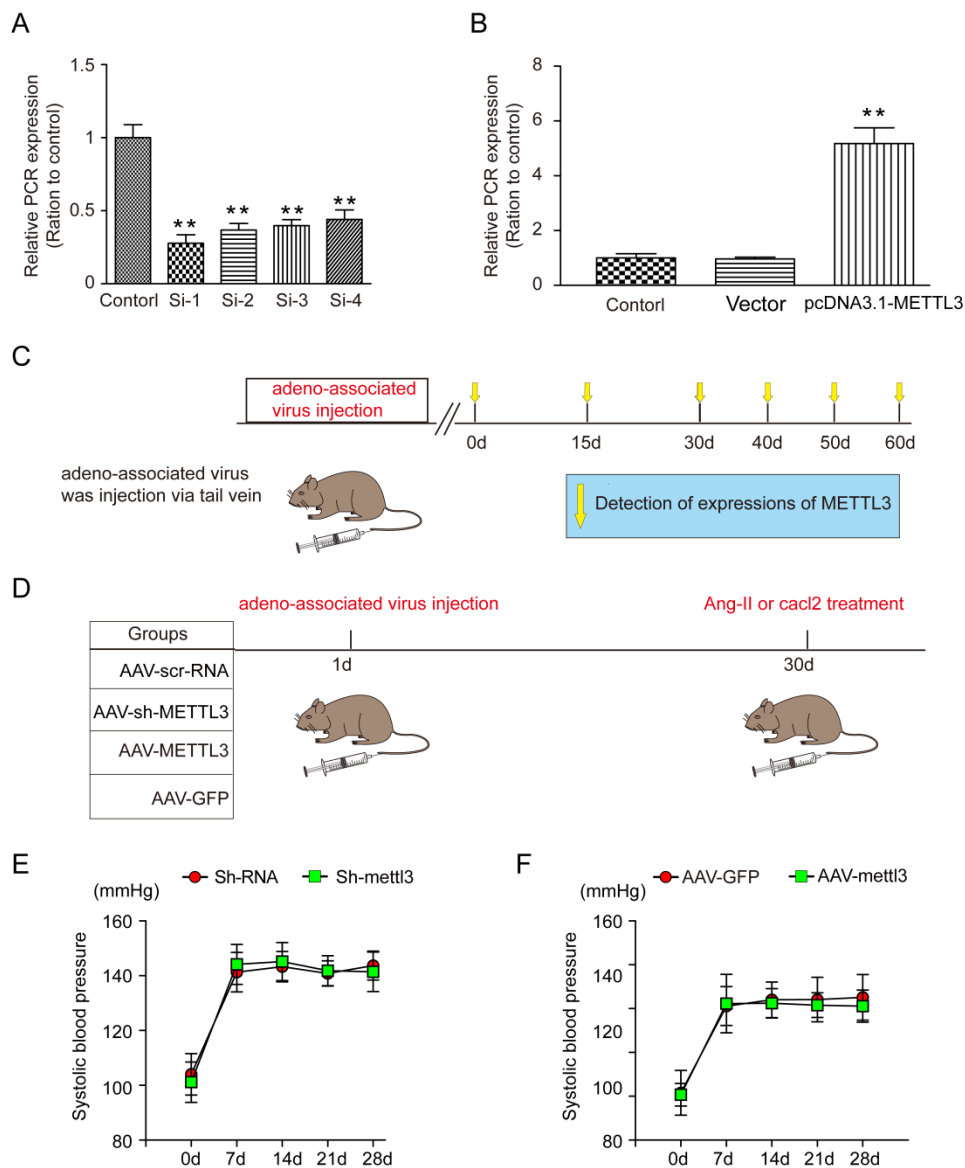

Online Figure 1

**Online Figure 1.** Selection of a potent adeno-associated virus (AAV) carrying METTL3 siRNA and overexpression plasmids and a diagram of the virus-related experimental flow. A, Inhibitory effects of four small interfering RNAs (siRNAs) against METTL3 in VSMCs as assessed by qRT-PCR analysis. B, Overexpression effects of the constructed pcDNA3.1-METTL3 plasmid in VSMCs as assessed by qRT-PCR analysis. C, Protocol for the in vivo AAV-mediated METTL3 knockdown and overexpression experiment. A predetermined number of male mice were injected with Scr-RNA, sh-METTL3, AAV-GFP or AAV-METTL3. Before injection and at 15 days, 30 days, 40 days, 50 days, and 60 days after the initial injection, a predetermined number of mice were sacrificed, and aortic samples were collected to detect aortic METTL3 expression (n=3). D, Thirty days after the initial AAV transfection, mice were treated with Ang II via minipump for four weeks or were

subjected to CaCl<sub>2</sub>-treatment surgery and sacrificed after 3 or six weeks. The data are presented as the mean  $\pm$  SD. \*P<0.05, \*\*P<0.01.

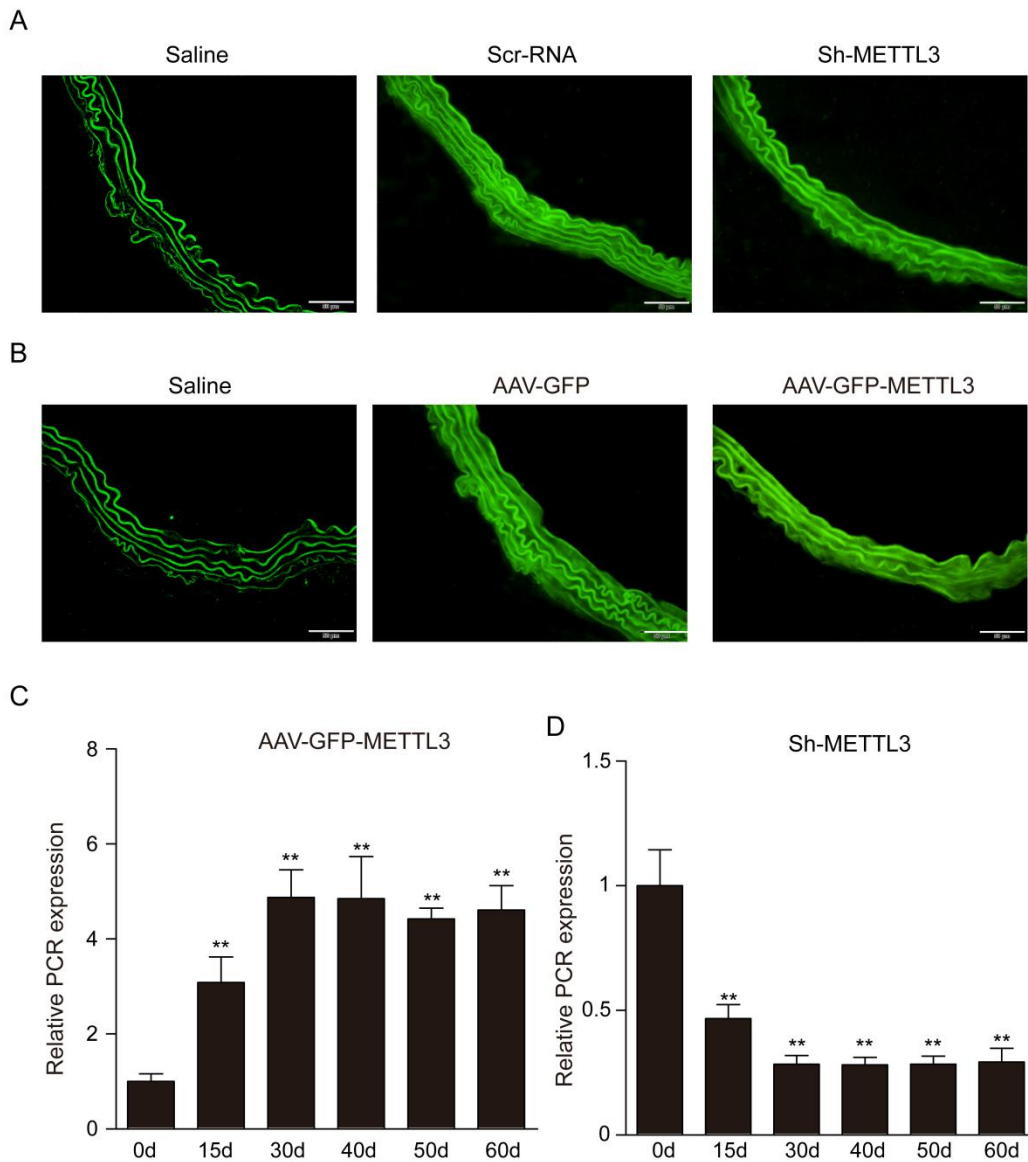

OnlineFigure 2

**Online Figure 2.** Confirmation of the viral infection efficiency in the suprarenal aortas of mice. A and B, Representative immunofluorescent staining of virus-borne green fluorescent protein (GFP) in the aortas of mice from the different virus-mediated groups and the saline group (scale bar, 50  $\mu$ m). C and D, qRT-PCR analysis of the mRNA expression of METTL3 over time after sh-METTL3 or AAV-METTL3 transfection in the suprarenal aortas of mice (n=3). The data are presented as the mean  $\pm$  SD. \*P<0.05.

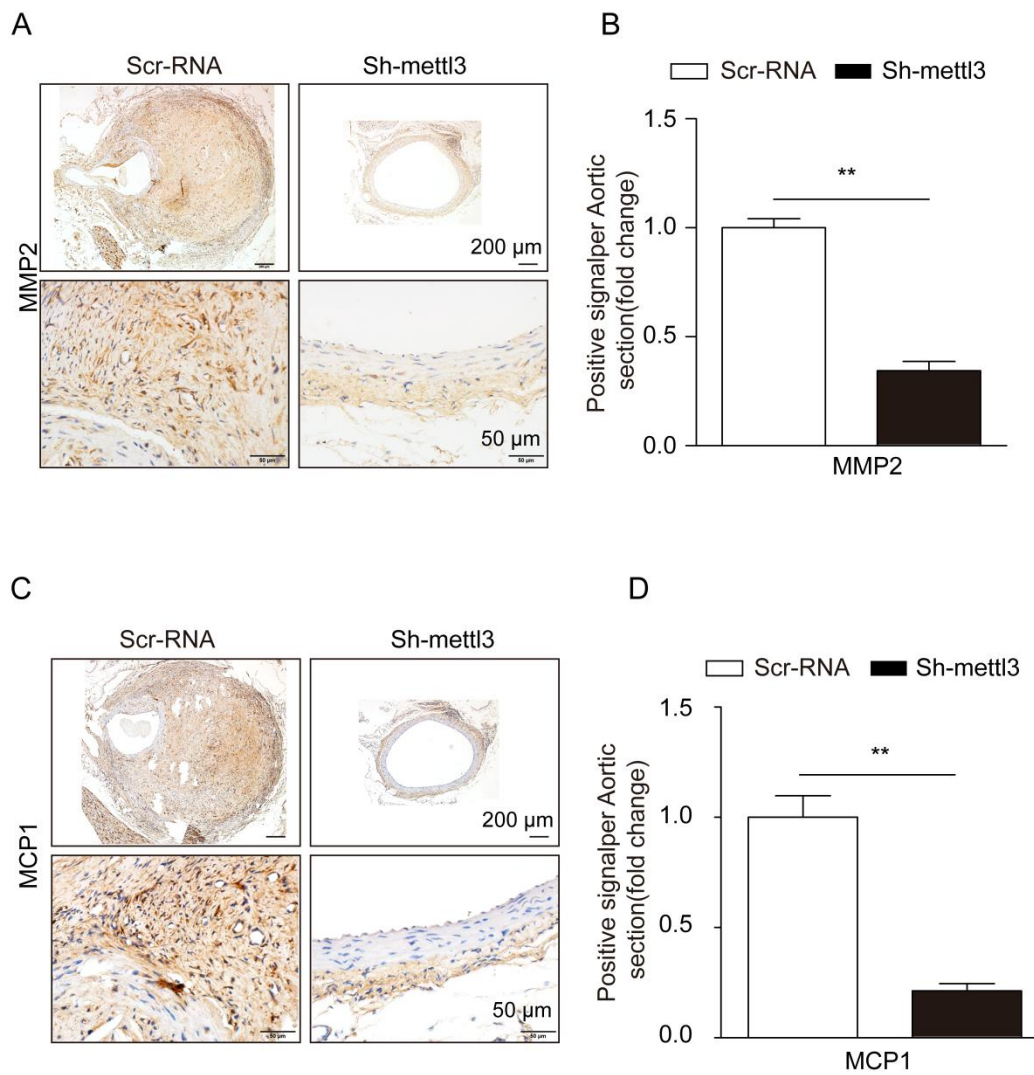

Online Figure 3

**Online Figure 3.** METTL3 knockdown attenuates MMP2 and MCP1 expression in Ang II-infused ApoE<sup>-/-</sup> mice. A to D, Immunohistochemical staining of abdominal aortic MMP2 (A,B) and MCP1 (C,D) in Ang II-infused male ApoE<sup>-/-</sup> mice (n=3; scale bars, 200 μm (upper) and 50 μm (lower)). The data are presented as the mean ± SD. \*P<0.05.

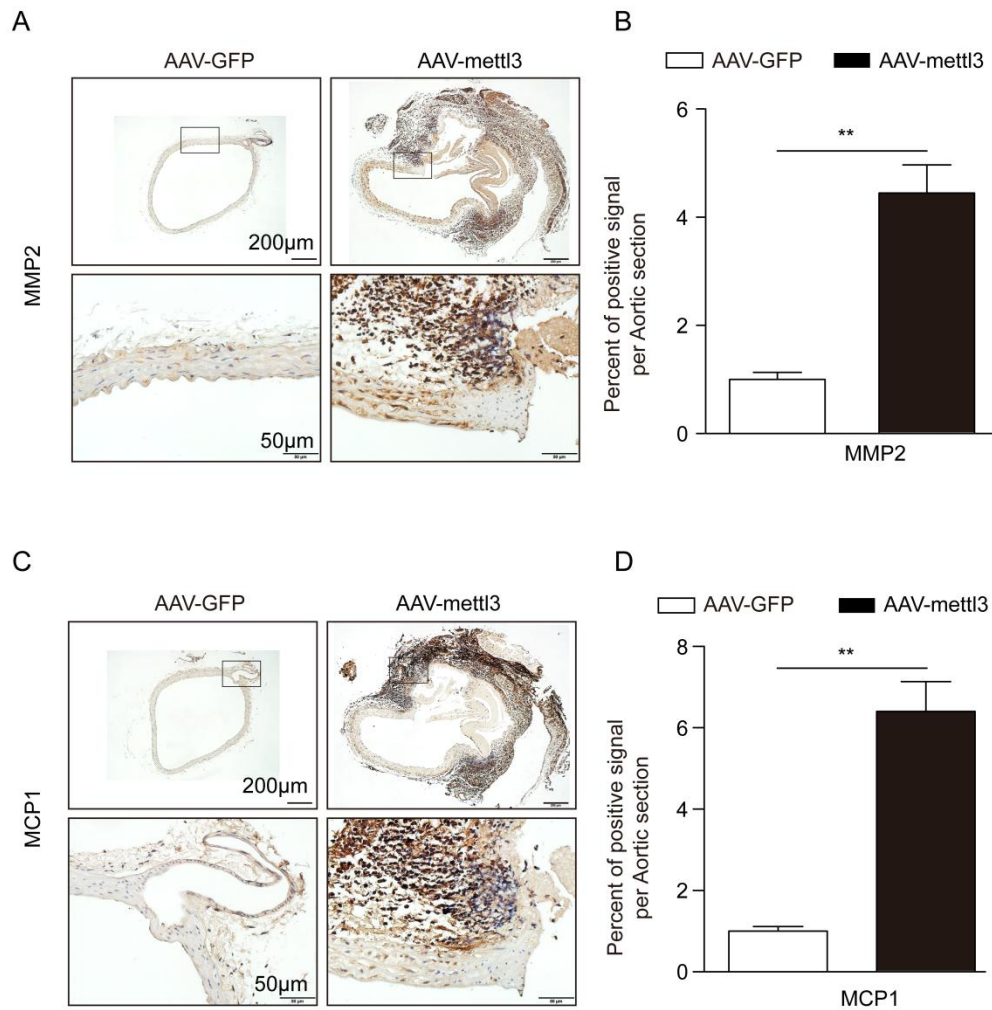

Online Figure 4

**Online Figure 4.** Overexpression of METTL3 increases the expression of MMP2 and MCP1 in Ang II-infused C57BL/6J mice. A to D, Immunohistochemical staining of abdominal aortic MMP2 (A,B) and MCP1 (C,D) in Ang II-infused C57BL/6J mice (n=3; scale bars, 200 µm (upper) and 50 µm (lower)). The data are presented as the mean  $\pm$ SD. \*P<0.05.

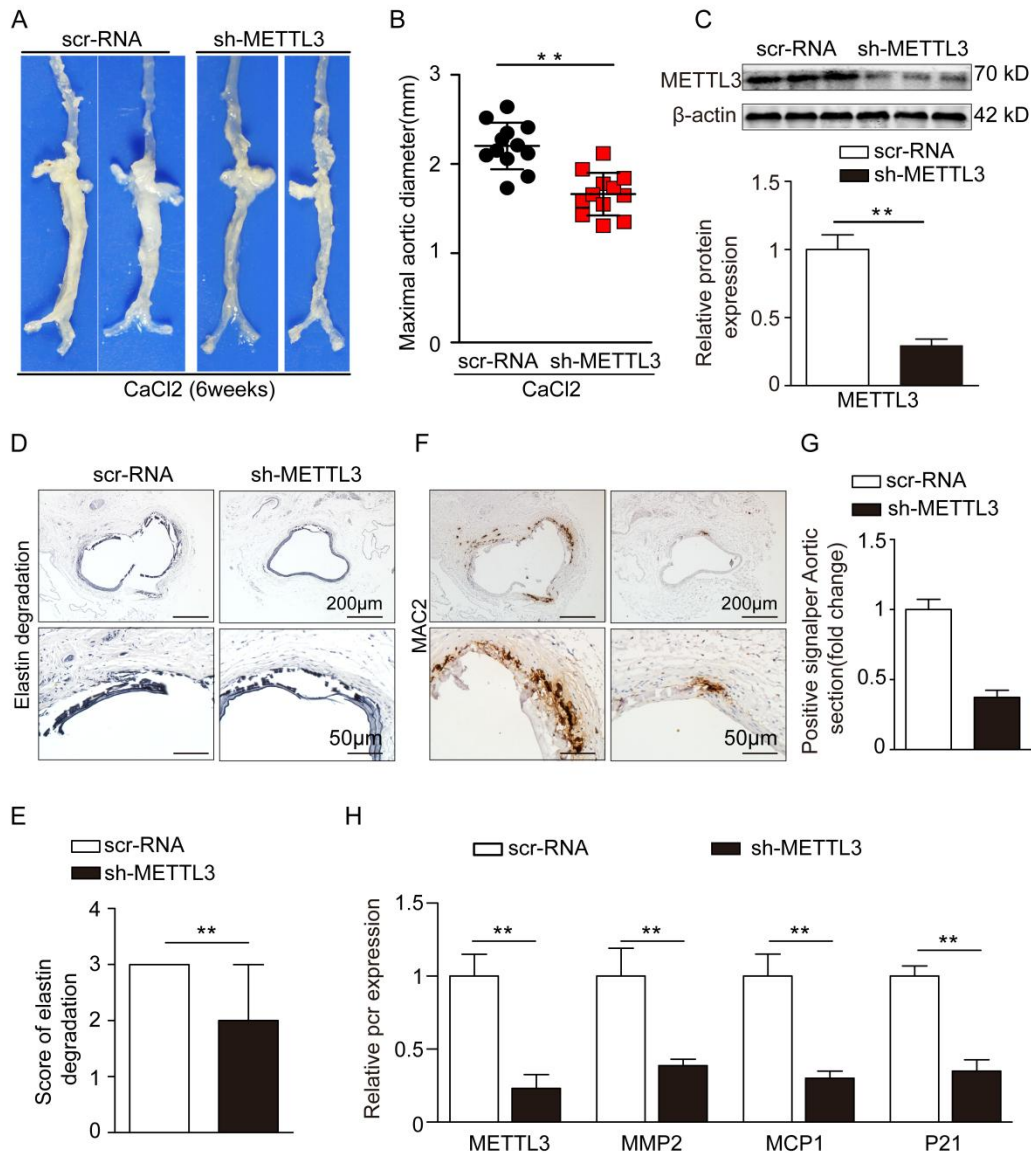

Online Figure 5

**Online Figure 5.** METTL3 suppression inhibits CaCl<sub>2</sub>-induced AAA formation. C57BL/6J mice were injected with Scr-RNA or sh-METTL3, and their infrarenal aortas were then treated with CaCl<sub>2</sub> for 15 min. After six weeks, the mice were sacrificed and used for analysis. A, Representative images showing C57BL/6J mouse infrarenal aortas treated with CaCl<sub>2</sub>. B, Maximal diameters of infrarenal aortas from CaCl<sub>2</sub>-induced C57BL/6J mice. C, Representative western blots and statistical analysis of aortic METTL3 in CaCl<sub>2</sub>-treated C57BL/6J mice. D and E, Representative elastin staining and statistical analysis of elastin degradation scores in the two groups of mice. F and G, Representative immunohistochemical staining (F) and statistical analysis (G) of MAC2 in aortas from the two groups of mice (n=4 per group). G and H, mRNA levels of aortic METTL3, MCP-1, MMP-2 and P21 in CaCl<sub>2</sub>-treated C57BL/6J mice. The data are presented as the mean ± SD. \*P<0.05, \*\*P<0.01.

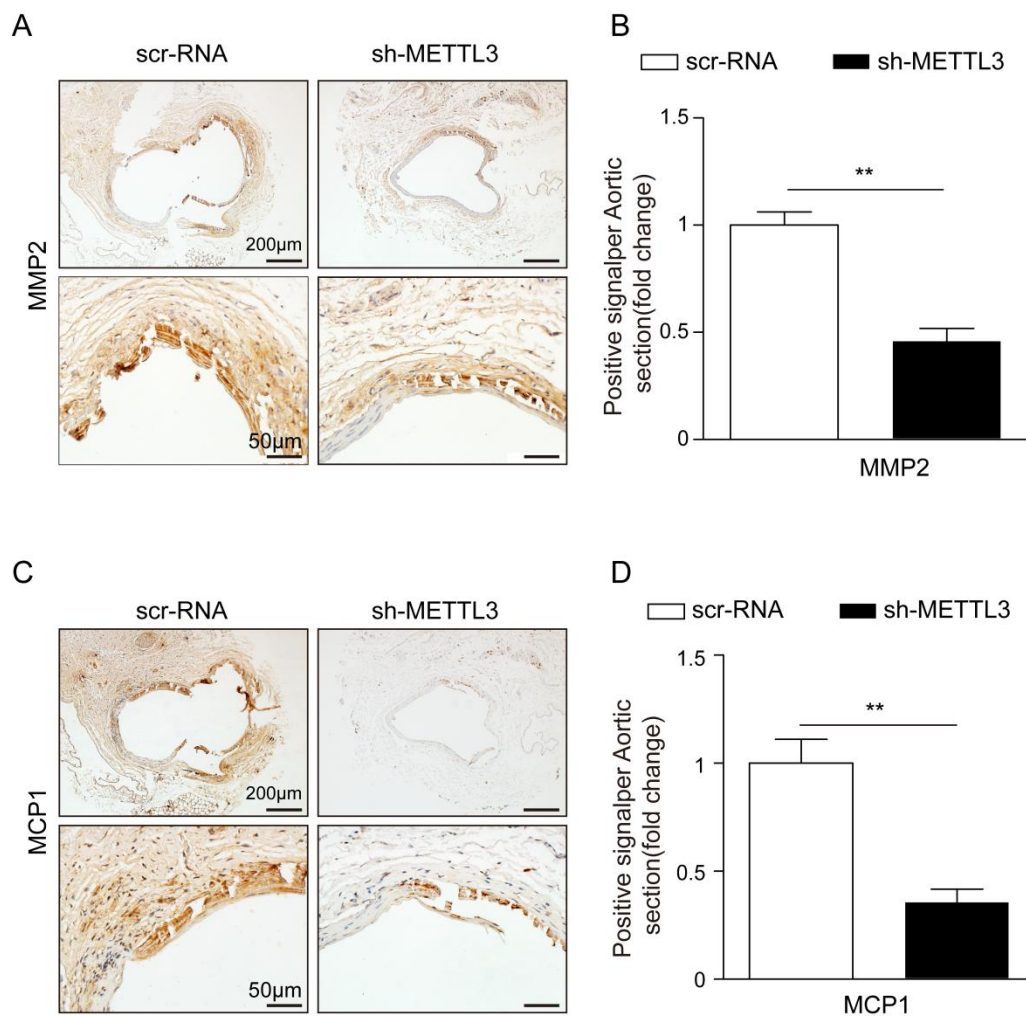

Online Figure 6

**Online Figure 6.** METTL3 suppression inhibits vascular MMP2 and MCP1 expression. A to C, Immunofluorescent staining for MMP2 (A,B) and MCP1 (C,D) (scale bars, 200  $\mu\text{m}$  (upper) and 50  $\mu\text{m}$  (lower)). The data are presented as the mean  $\pm$  SD. \* $P < 0.05$ .



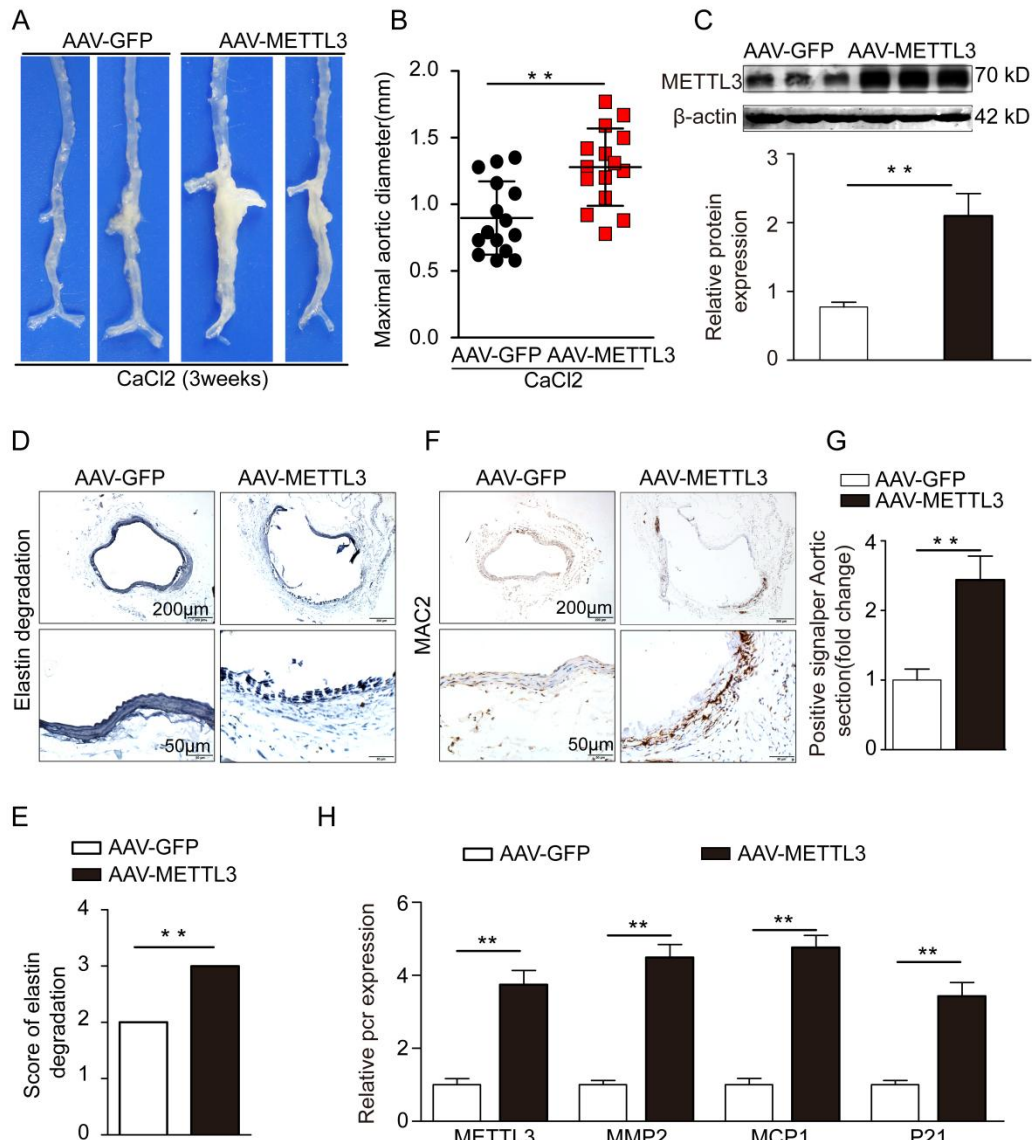

Online Figure 7

**Online Figure 7.** METTL3 overexpression exacerbates  $\text{CaCl}_2$ -induced AAA formation. C57BL/6J mice were injected with AAV-GFP or AAV-METTL3, and their infrarenal aortas were then treated with  $\text{CaCl}_2$  for 15 min. After three weeks, the mice were sacrificed and used for analysis. A, Representative images showing C57BL/6J mouse infrarenal aortas treated with  $\text{CaCl}_2$ . B, Maximal diameters of infrarenal aortas from  $\text{CaCl}_2$ -induced C57BL/6J mice. C, Representative western blots and statistical analysis of aortic METTL3 in  $\text{CaCl}_2$ -treated C57BL/6J mice. D and E, Representative elastin staining and statistical analysis of elastin degradation scores in the two groups of mice. F and G, Representative immunohistochemical staining (F) and statistical analysis (G) of MAC2 in aortas from the two groups of mice (n=4 per group). G and H, mRNA levels of aortic METTL3, MCP-1, MMP-2 and P21 in  $\text{CaCl}_2$ -treated C57BL/6J mice. The data are presented as the mean  $\pm$  SD. \* $P < 0.05$ , \*\* $P < 0.01$ .

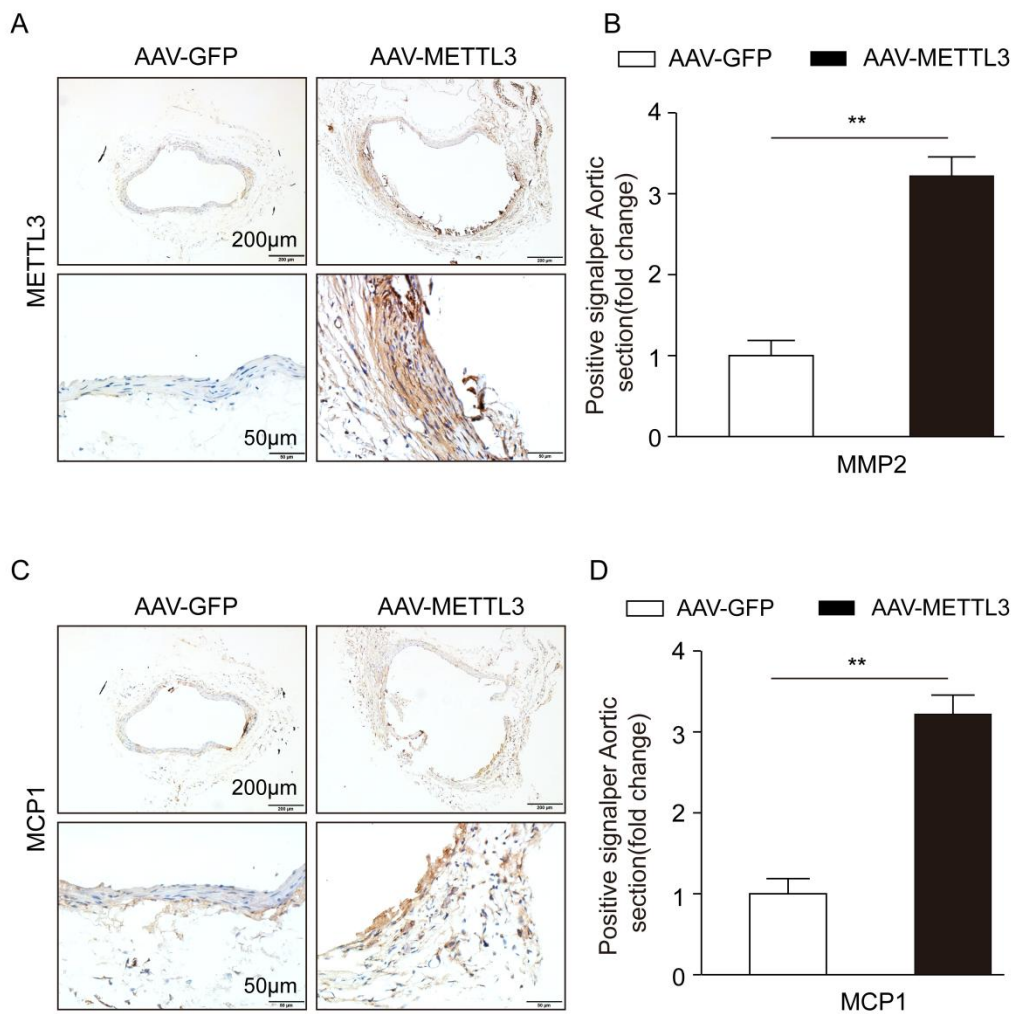

Online Figure 8

**Online Figure 8.** METTL3 overexpression increases vascular MMP2 and MCP1 expression. A to D, Immunofluorescent staining for MMP2 (A,B) and MCP1 (C,D) (scale bars, 200 µm (upper) and 50 µm (lower)). The data are presented as the mean ± SD. \* $P < 0.05$ , \*\* $P < 0.01$ .

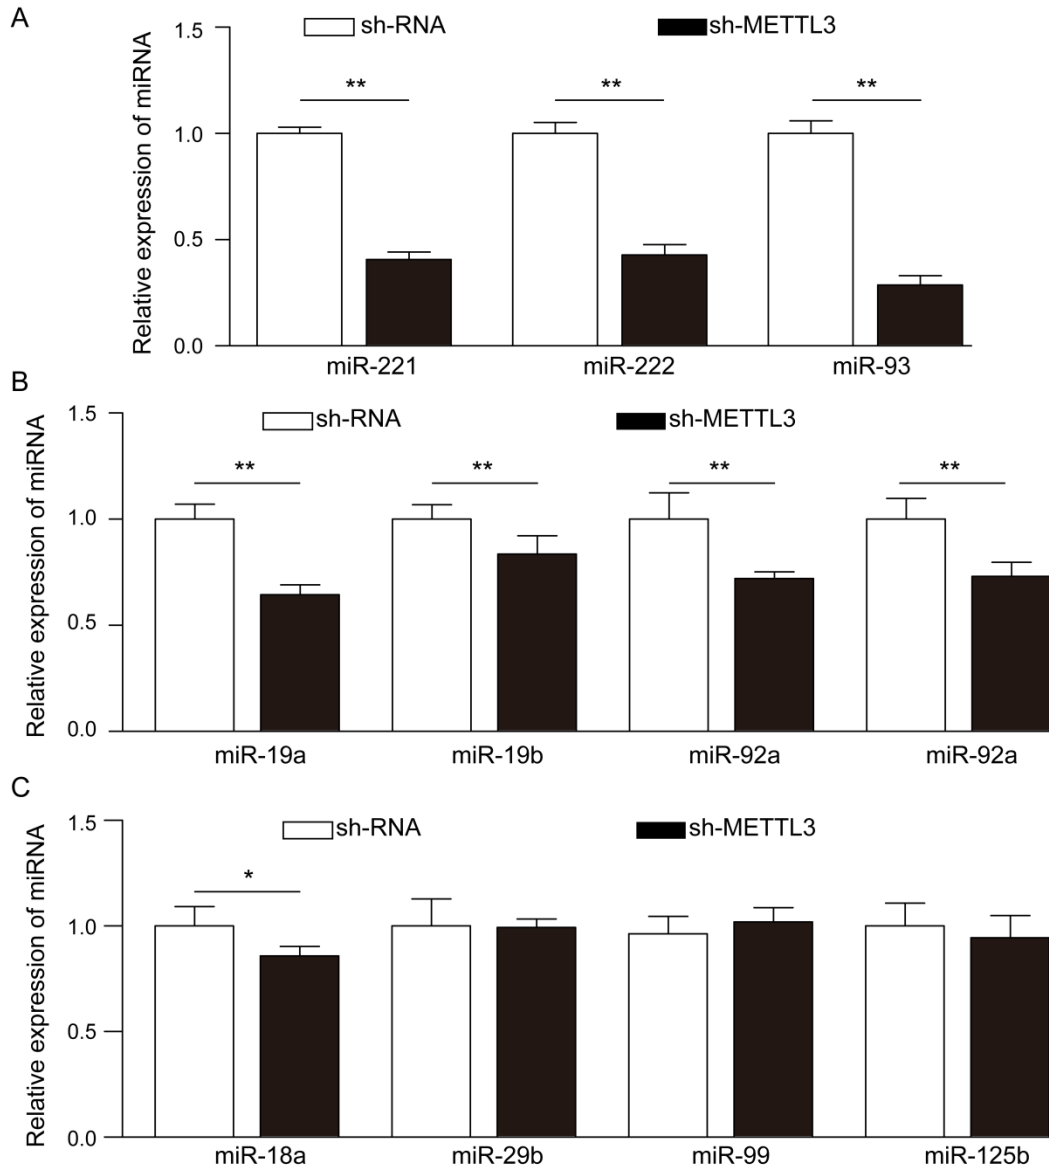

Online Figure 9

**Online Figure 9.** Expression of miRNAs in METTL3-depleted SMCs. A, miR-34a, miR-221, miR-222 and miR-93 were quantified by qRT-PCR upon METTL3 depletion in SMCs. B, miR-19a, miR-19b, miR-92a and miR-20a were quantified by qRT-PCR upon METTL3 depletion in SMCs. C, miR-18a, miR-29b, miR-99 and miR-125b were quantified by qRT-PCR upon METTL3 depletion in SMCs. Abbreviations: siRNA, small interfering fragment control; sh-METTL3, METTL3 knockdown. The data are presented as the mean  $\pm$  SD. \* $P < 0.05$ , \*\* $P < 0.01$ .

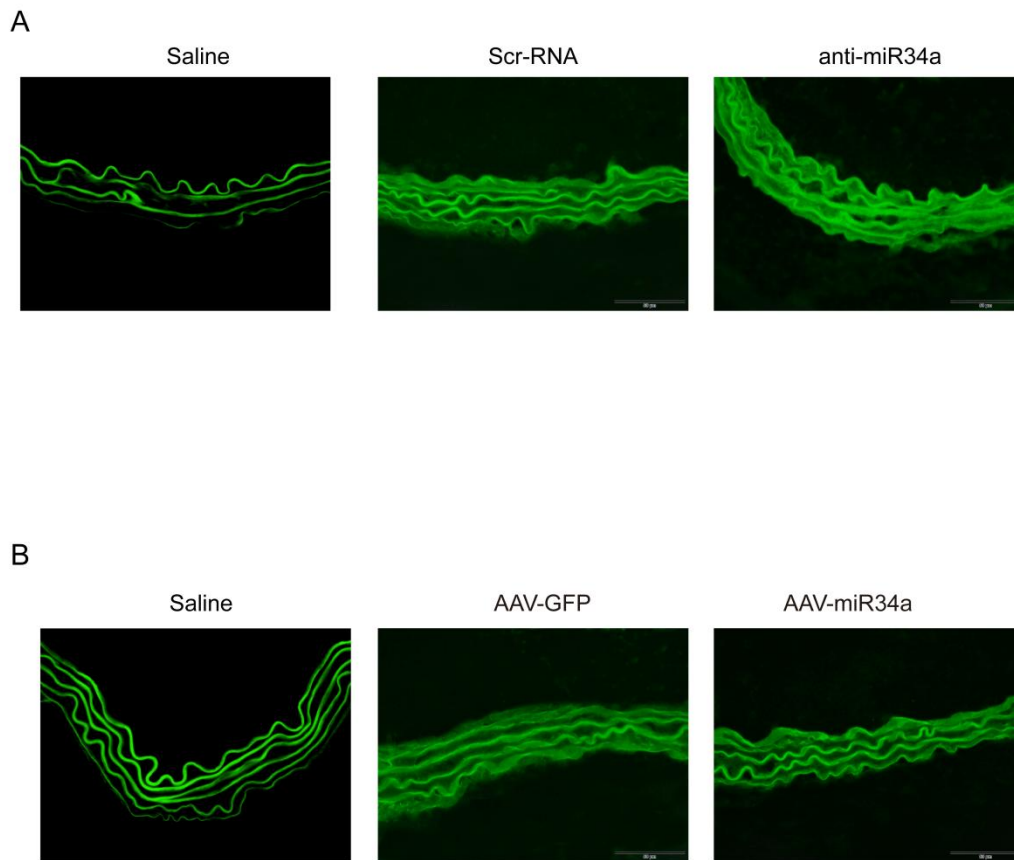

Online Figure 10

**Online Figure 10.** Confirmation of the transfection efficiency of anti-miR34a, AAV-miR34a, and control sequences in the supracrenal aortas of mice. A and B, Representative immunofluorescent staining of virus-borne green fluorescent protein (GFP) in the aortas of mice from the different virus-mediated groups and the saline group (scale bar, 50  $\mu$ m).

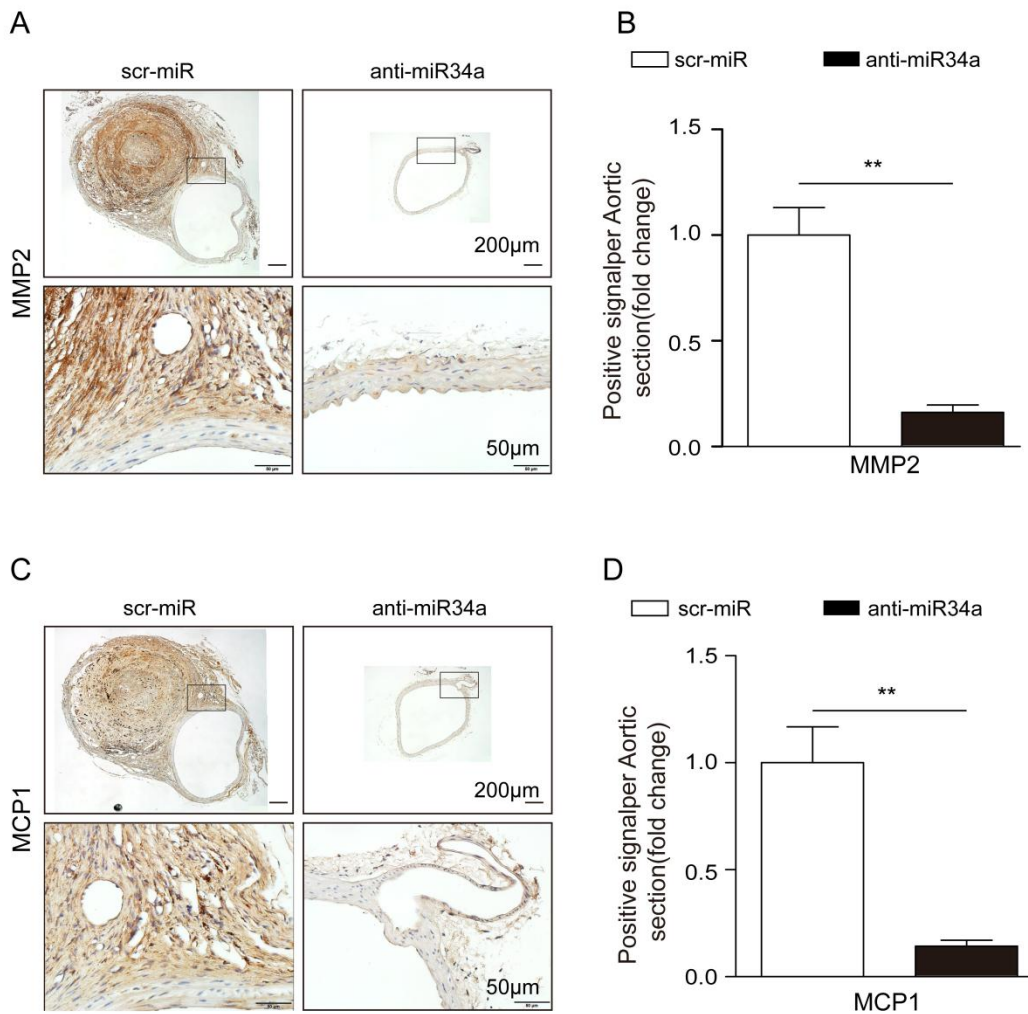

Online Figure 11

**Online Figure 11.** miR34a knockdown inhibits vascular MMP2 and MCP1 expression. A to C, Immunofluorescent staining for MMP2 (A,B) and MCP1 (C,D) (scale bars, 200  $\mu\text{m}$  (upper) and 50  $\mu\text{m}$  (lower)). The data are presented as the mean  $\pm$  SD. \* $P < 0.05$ , \*\* $P < 0.01$ .

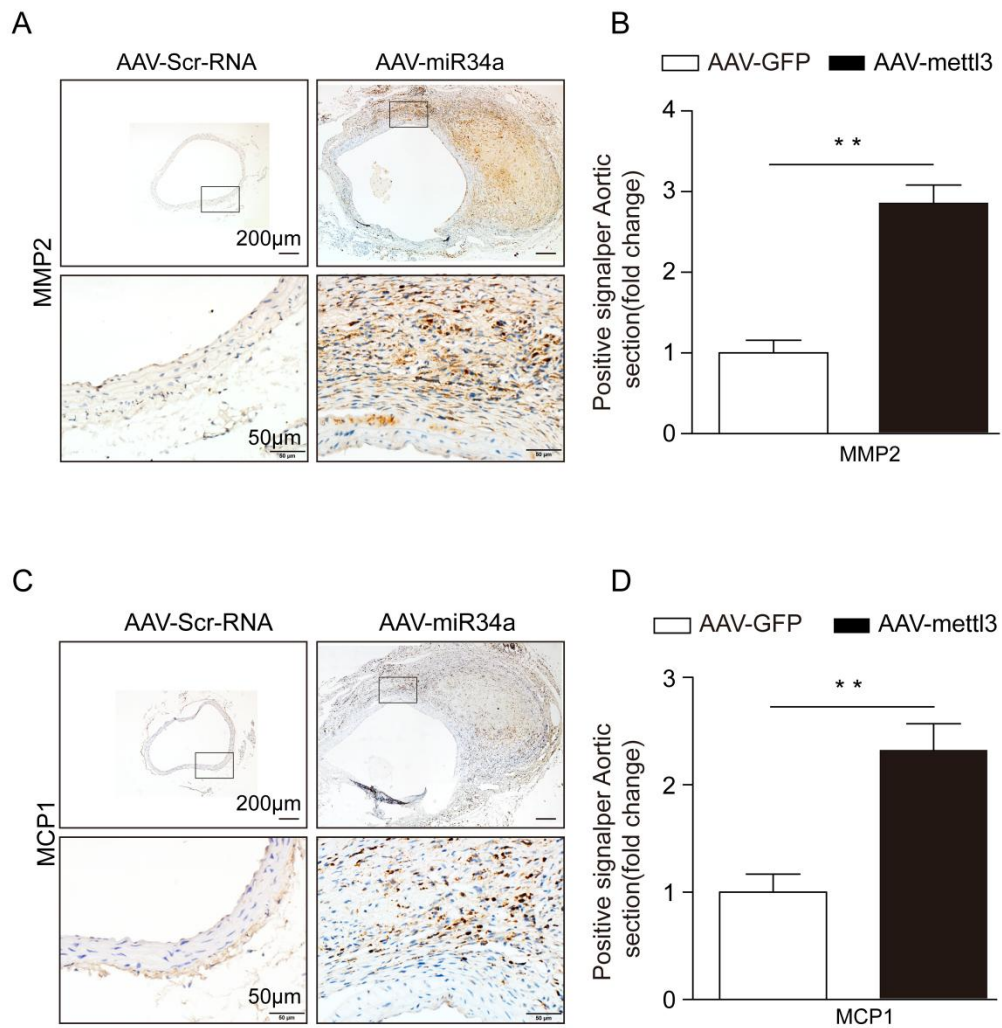

Online Figure 12

**Online Figure 12.** miR34a overexpression increases vascular MMP2 and MCP1 expression. A to D, Immunofluorescent staining for MMP2 (A,B) and MCP1 (C,D) (scale bars, 200 µm (upper) and 50 µm (lower)). The data are presented as the mean ± SD. \* $P < 0.05$ , \*\* $P < 0.01$ .

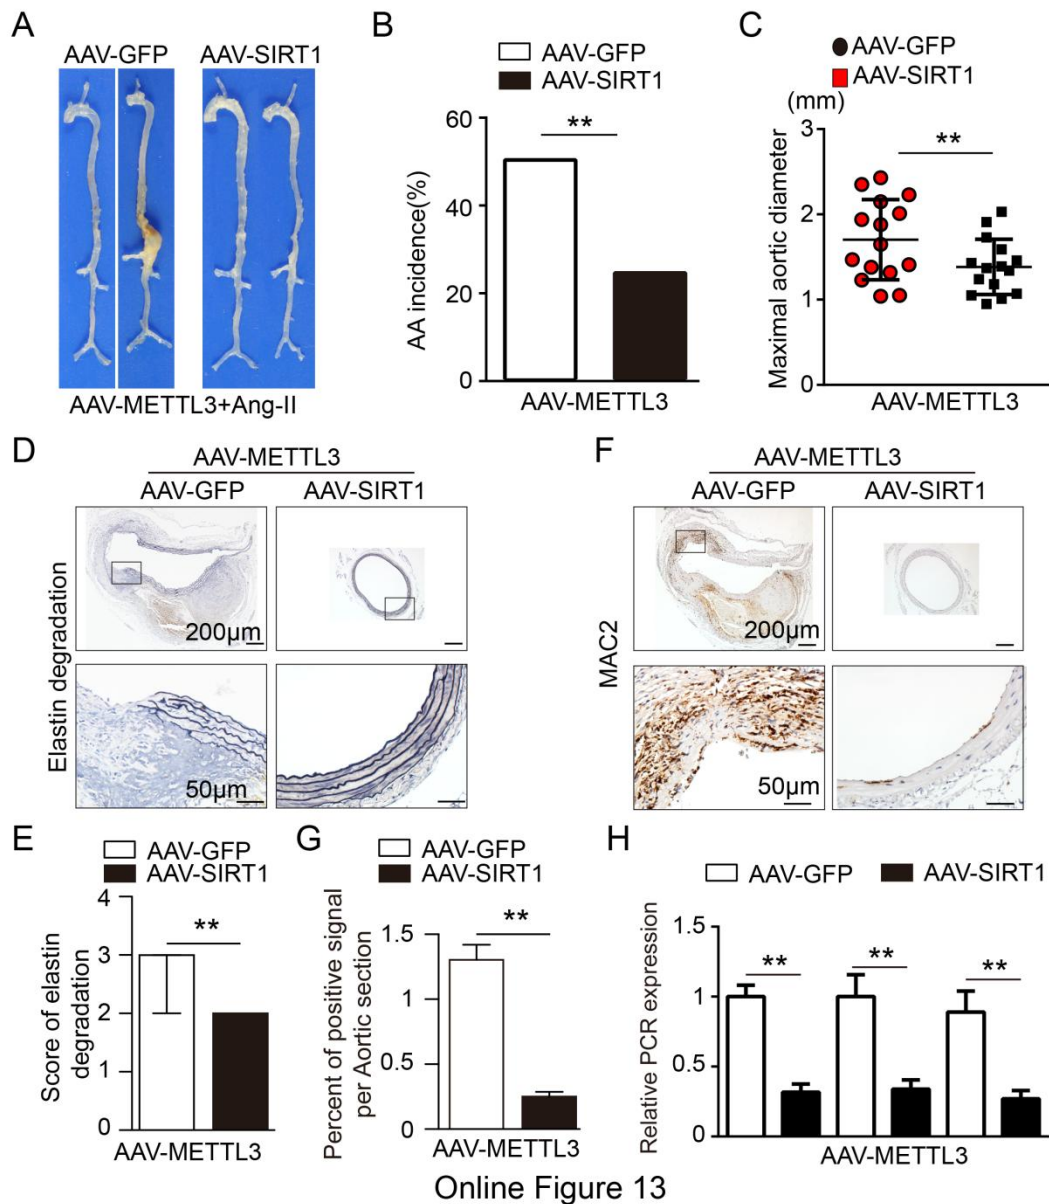

**Online Figure 13.** METTL3 overexpression promotes AAA via miR34a/SIRT1. **A**, Representative photographs of the macroscopic features of AAAs in AAV-METTL3 transfected Ang II-infused C57BL/6J mice in the AAV-GFP group or the AAV-SIRT1 group. **B**, Statistical analysis of AAA incidence in AAV-METTL3 transfected Ang II-infused C57BL/6J mice. **C**, Maximal aortic diameters in the AAV-METTL3-transfected Ang II-infused C57BL/6J mice in the two groups. **D** and **E**, Representative elastin staining and elastin degradation scores in suprarenal aortas from AAV-METTL3 transfected Ang II-infused C57BL/6J mice. The data are presented as the medians and quartiles. **\*\*** $P < 0.01$ . **F** and **G**, Representative immunostaining for MAC2 (scale bars, 200 and 50  $\mu$ m) and the corresponding densitometric analysis ( $n=3$ ). **H**, Relative mRNA expression of MMP2, MCP1 and P21 in AAV-METTL3 transfected Ang II-infused C57BL/6J mouse aortas ( $n=4$ ). The data are presented as the mean  $\pm$  SD. **\*** $P < 0.05$ , **\*\*** $P < 0.01$ .

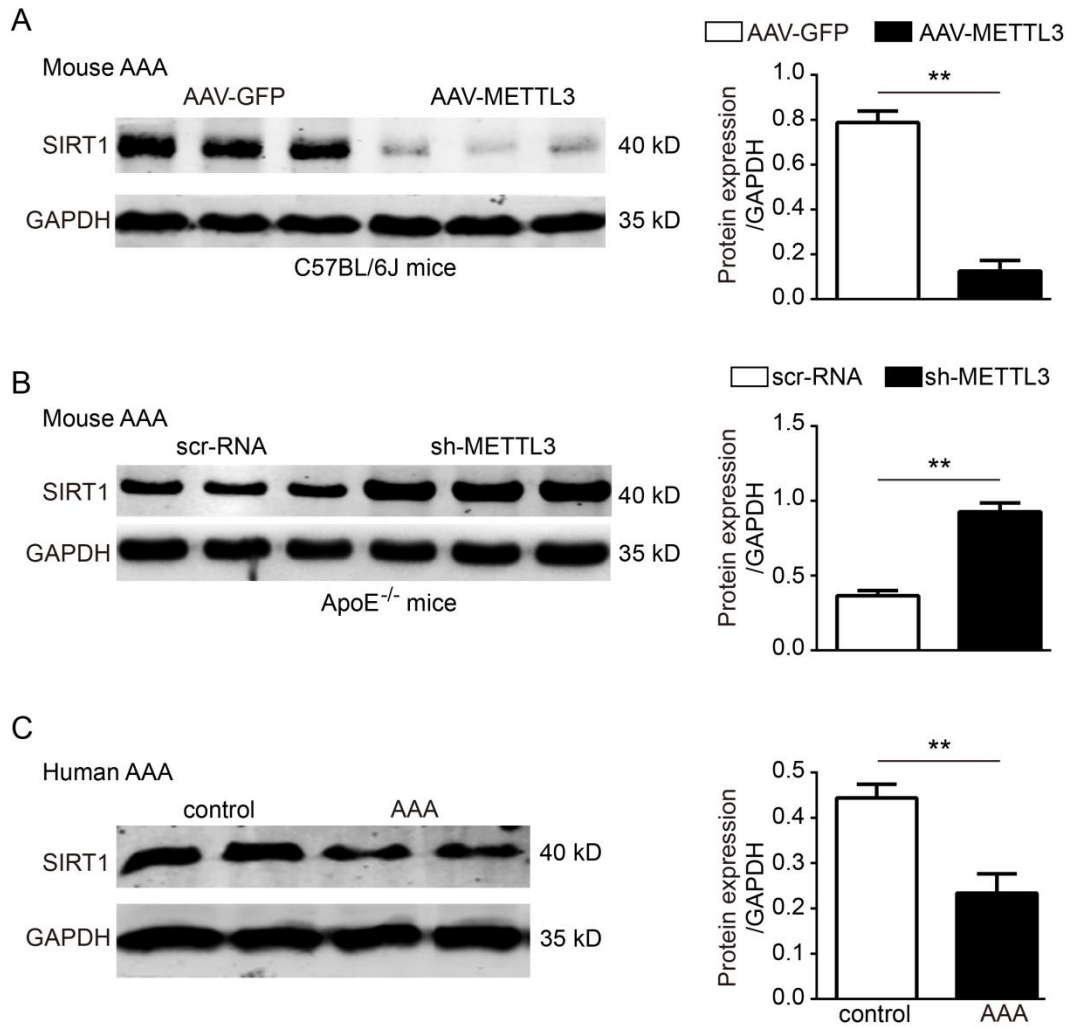

**Online Figure 14.** SIRT1 was substantially upregulated in METTL3 knockdown samples but downregulated in METTL3 overexpression samples. A, Western blot analysis of SIRT1 in Ang II-infused C57BL/6J mice in the AAV-GFP group or the AAV-METTL3 group (n=4). B, Western blot analysis of SIRT1 in Ang II-infused male ApoE<sup>-/-</sup> mice in the scr-RNA group or the sh-METTL3 group (n=4). C, Western blot analysis of SIRT1 in human AAA and adjacent nonaneurysmal aortic samples. \*\*P<0.01.



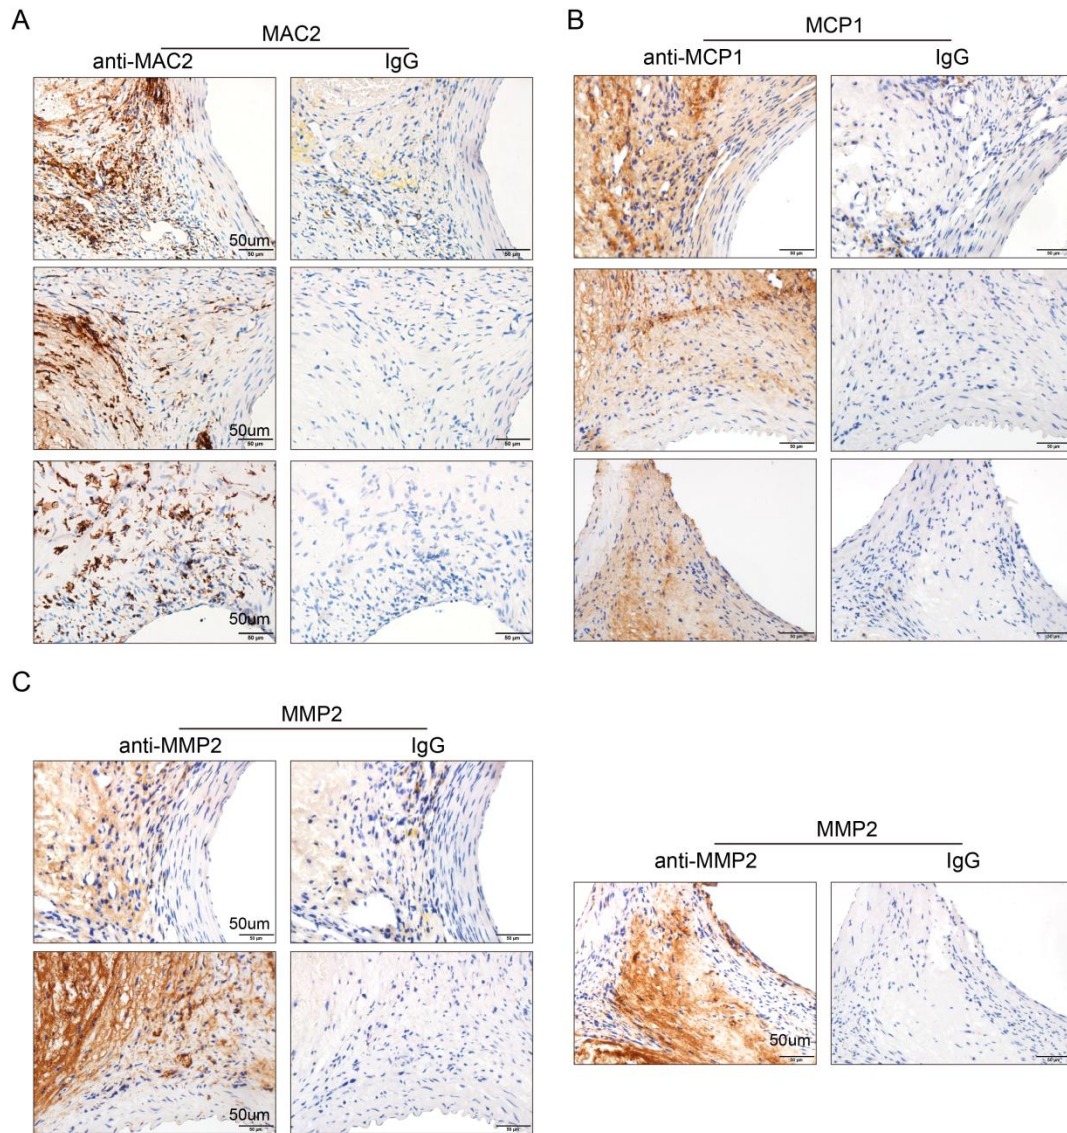

Online Figure 15

**Online Figure 15.** Negative control experiments confirming the specificity of antibody binding in the immunohistochemistry results. A to C, Representative images of immunohistochemical staining for MAC2 (A), MCP1 (B), and MMP2 (C) (scale bars, 50 μm).

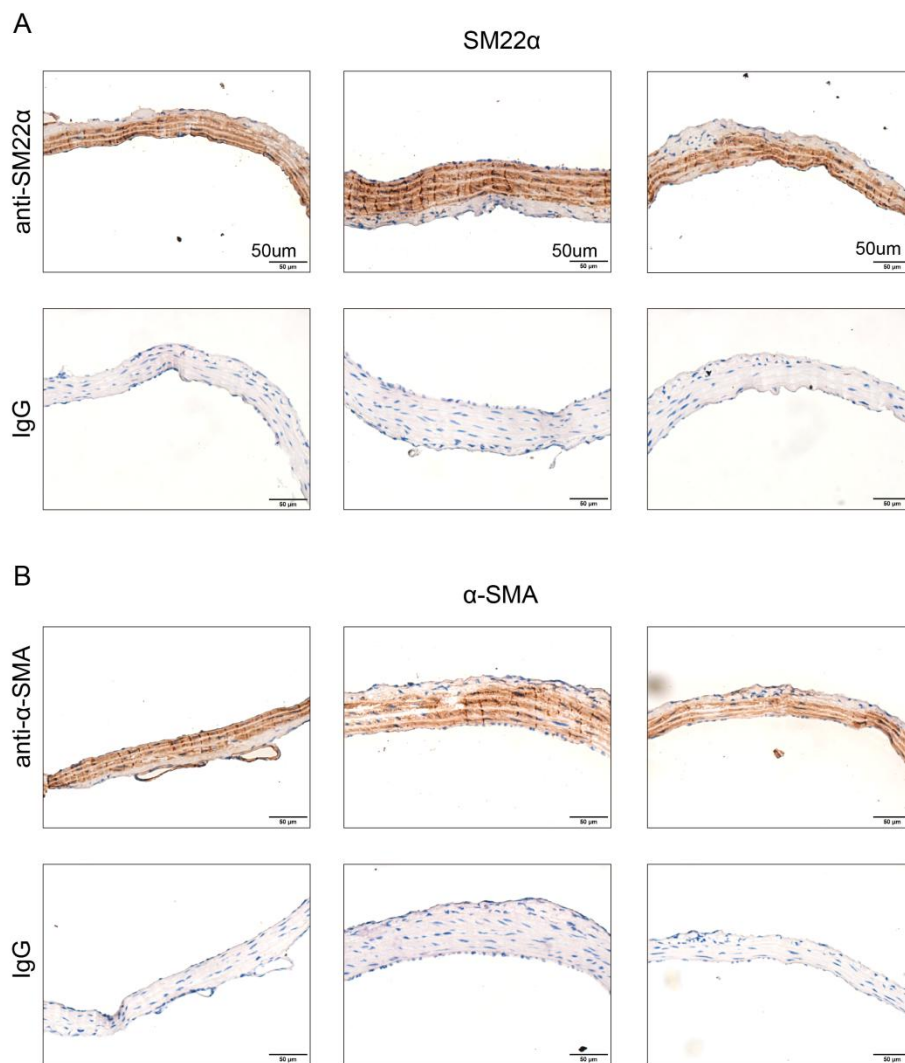

Online Figure 16

**Online Figure 16.** Negative control experiments confirming the specificity of antibody binding in the immunohistochemistry results. A and B, Representative images of immunohistochemical staining for SM22 $\alpha$  (A) and  $\alpha$ -SMA (B) (scale bars, 50  $\mu$ m).

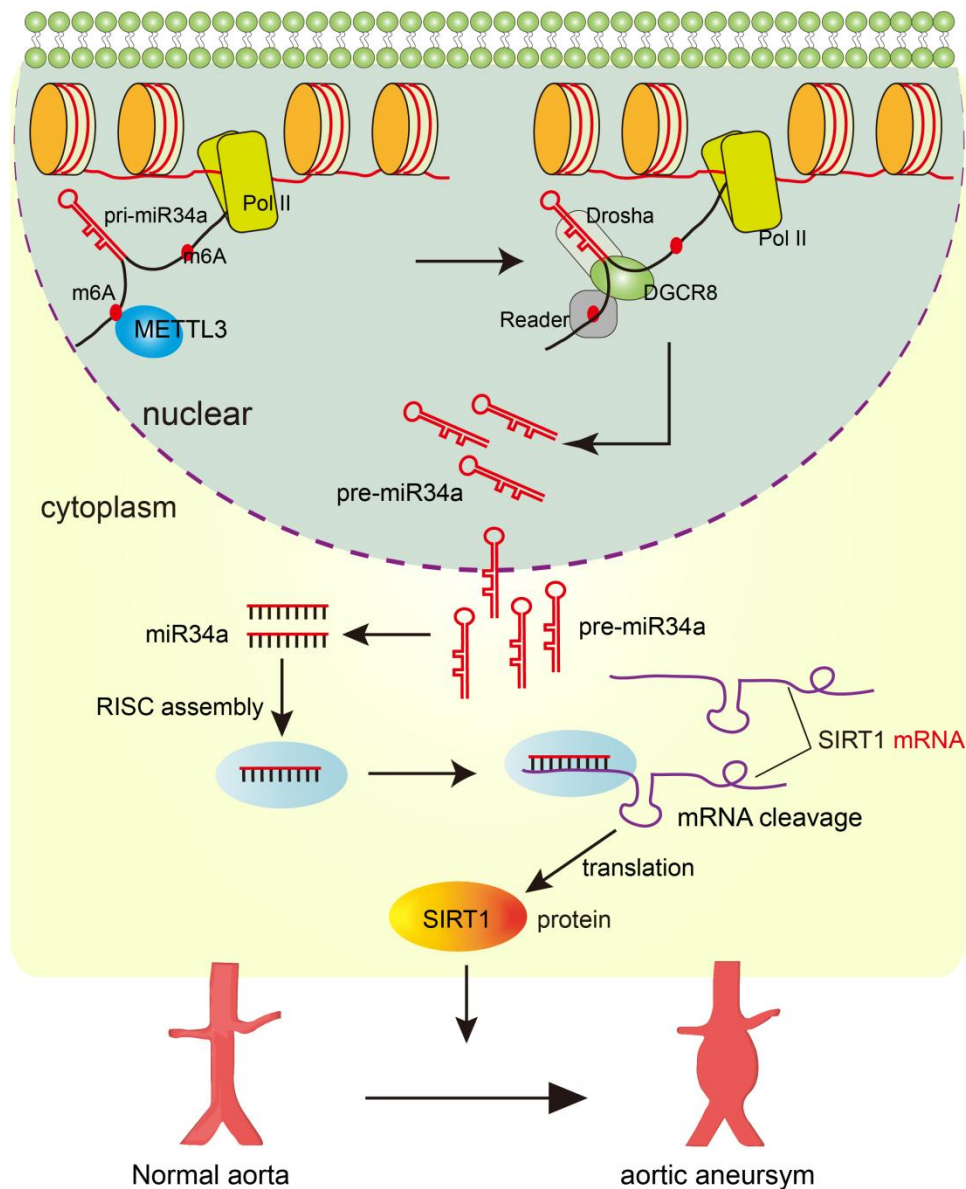

Online Figure 17

**Online Figure 17.** Working model of the role of METTL3 in AAA formation. METTL3 increases m<sup>6</sup>A modification of pri-miR34a, which favors the binding of pri-miR34a to DGCR8. METTL3 promotes mature miR34a expression in a DGCR8-dependent manner, which leads to AAA formation through inhibition of SIRT1 expression.

## Major Resources Tables

**Table 1**

**Patient clinical information ( n=5 )**

|                         |                 |
|-------------------------|-----------------|
| characteristics         | AAA             |
| Ever-smoker             | 100%            |
| hypertensive            | 100%            |
| hyperlipidemia          | 100%            |
| coronary artery disease | 80%             |
| gender                  | male            |
| average age             | 64.2±4.44 years |

**Table 2**

**Specific siRNAs against METTL3, miR34a and their nonspecific controls (NCs)**

|                                                                |
|----------------------------------------------------------------|
| siMETTL3,sense:GCAUUGGUGCUGUGUUA AATTUUUAACACAGCACCAAU<br>GCTT |
| siNC,sense: UUCUCCGAACGUGUCACGUTTACGUGACACGU UCGGAGAATT        |
| Anti-miR-34a,sense: ACAACCAGCTAAGACACTGCCA                     |
| Scr-miR, sense: TTCTCCGAACGTGTCACGT                            |

**Table 3**

Antibodies for immunohistochemistry analysis

| name               | Vendor or Source | Catalog # |
|--------------------|------------------|-----------|
| anti-SM22 $\alpha$ | Abcam            | Ab170902  |
| anti- $\alpha$ SMA | Abcam            | ab32575   |
| anti-MMP2          | Abcam            | ab37150   |
| anti-MCP1          | Thermo Fisher    | PA5-34505 |
| anti-MAC2          | Abcam            | ab76245   |
| anti-IgG           | Abcam            | ab172730  |

**Table 4**

Antibodies for immunofluorescent analysis

| name                | Vendor or Source | Catalog # |
|---------------------|------------------|-----------|
| anti- METTL3        | Abcam            | ab195352  |
| anti- SM22 $\alpha$ | Abcam            | ab10135   |
| Alexa Fluor 488     | Abcam            | ab150129  |
| Alexa Fluor 594     | Abcam            | ab150088  |

**Table 5**

Antibodies for western blots

| name                 | Vendor or Source | Catalog # |
|----------------------|------------------|-----------|
| anti- METTL3         | Abcam            | ab195352  |
| anti- MCP1           | Thermo Fisher    | PA5-34505 |
| anti- MMP2           | Abcam            | ab37150   |
| anti- P21            | Abcam            | Ab109119  |
| anti- SM22 $\alpha$  | Abcam            | ab155272  |
| anti- SIRT1          | Abcam            | ab110304  |
| anti- $\beta$ -actin | Abcam            | ab5694    |
| anti-GAPDH           | Abcam            | Ab9485    |

**Table 6**

Quantitative real-time PCR

| Primer                  | Sequence (5'-3')        |
|-------------------------|-------------------------|
| miR34AHG _forward       | TGGCAGTGTCTTAGCTGGTTGT  |
| miR34AHG _reverse       | TGGCGTCTCCCCTGGTCT      |
| miR34a _forward         | TGGCAGTGTCTTAGCTGGTTGT  |
| miR34a _reverse         | AGTGCAGGGTCCGAGGTATT    |
| U6 _forward             | CTCGCTTCGGCAGCACA       |
| U6 _reverse             | AACGCTTCACGAATTTGCGT    |
| METTL3 _forward         | TTCATCTTGGCTCTATCCGGC   |
| METTL3 _reverse         | GCACGGGACTATCACTACGG    |
| METTL14 _forward        | CCATAATGATTACTGCCAAC    |
| METTL14 _reverse        | GTCAAAGGCTTCTATGTCTG    |
| WTAP _forward           | GCAACCAAAGAGCAGGAGAT    |
| WTAP _reverse           | CTTCCAGGCACTCAGTTCAT    |
| YTHDF2 _forward         | TAGCCAGCTACAAGCACACC    |
| YTHDF2 _reverse         | TTTCCCACGACCTTGACGTT    |
| FTO _forward            | GAGCAGCCTACAACGTGACT    |
| FTO _reverse            | GAAGCTGGACTCGTCCTCAC    |
| KIAA1429 _forward       | GCTGATGACTGCAATCTGCG    |
| KIAA1429 _reverse       | CTCCACAACAGCCCATAGCA    |
| METTL4 _forward         | TTCGAAGTTAATCCAAGAAGG T |
| METTL4 _reverse         | CGTTTGAAGCTCCATTCAT     |
| ALKBH5 _forward         | TGTGCTCAGTGGGTATGCTG    |
| ALKBH5 _reverse         | CTGACAGGCGATCTGAAGCA    |
| MMP2 _forward           | ACCAACACTGGGACCTGTAC    |
| MMP2 _reverse           | CGAAGAACACAGCCTTCTCCT   |
| MMP9 _forward           | GCGTGTCTGGAGATTCGACTTG  |
| MMP9 _reverse           | ACTGCAGGAGGTCTAGGTCAC   |
| MCP1 _forward           | ACCTGCTGCTACTCATTAC     |
| MCP1 _reverse           | CATTCAAAGGTGCTGAAGAC    |
| $\beta$ -actin _forward | GGCTGTATTCCTCCATCG      |
| $\beta$ -actin _reverse | CCAGTTGGTAACAATGCCATGT  |

**Table 7**

**(DGCR8) RIP-specific primer pairs for the miR34AHG gene**

|                                          |
|------------------------------------------|
| 5'- TGGCAGTGTCTTAGCTGGTTGT -3' (forward) |
| 5'- TGGCGTCTCCCACTGGTCT -3' (reverse)    |

**Table 8**

**(m<sup>6</sup>A) RIP-specific primer pairs for the miR34AHG gene**

|                                              |
|----------------------------------------------|
| Site 1: 5'- ATGCCAACTTTGAGGCCA-3' (forward)  |
| Site 1: 5'- CTCTCCATCCTCCGGTGA-3' (reverse)  |
| Site 2 : 5'- ATGCCAACTTTGAGGCCA-3' (forward) |
| Site 2 : 5'- AAGACCTGGGGAAGCCAC-3' (reverse) |
| Site 3 : 5'-AAGAGGTGACGCCAAACG-3' (forward)  |
| Site 3 : 5'-CCTGGCCTGTGTGAAAGG-3' (reverse)  |
