# Supplementary material for: METTL3 Induces AAA Development and Progression by Modulating N6-Methyladenosine-Dependent Primary miR34a Processing
Source: PubMed Central journal article supplement — Mol Ther Nucleic Acids. 2020 Jun 10;21:394–411. doi: 10.1016/j.omtn.2020.06.005 (PMC7347714; doi:10.1016/j.omtn.2020.06.005), 2020-06-10
Supplement: mmc2.pdf [file mmc2.pdf]

# METTL3 Induces AAA Development and Progression by Modulating N6-Methyladenosine-Dependent Primary miR34a Processing

Lintao Zhong,<sup>1,3</sup> Xiang He,<sup>1</sup> Haoyu Song,<sup>1</sup> Yili Sun,<sup>1</sup> Guojun Chen,<sup>1</sup> Xiaoyun Si,<sup>1</sup> Jie Sun,<sup>1</sup> Xiaoqiang Chen,<sup>1</sup> Wangjun Liao,<sup>2</sup> Yulin Liao,<sup>1</sup> and Jianping Bin<sup>1</sup>

<sup>1</sup>Department of Cardiology, State Key Laboratory of Organ Failure Research, Nanfang Hospital, Southern Medical University, Guangzhou 510515, China; <sup>2</sup>Department of Oncology, Nanfang Hospital, Southern Medical University, Guangzhou 510515, China; <sup>3</sup>Department of Cardiology, Zhuhai People's Hospital (Zhuhai Hospital Affiliated with Jinan University), Zhuhai 519000, China

**Identifying effective drugs to delay the progression of aortic aneurysms is a formidable challenge in vascular medicine. Methyltransferase-like 3 (METTL3) plays a key role in catalyzing the formation of N6-methyladenosine (m<sup>6</sup>A), but despite the functional importance of METTL3 and m<sup>6</sup>A in various fundamental biological processes, their roles in abdominal aortic aneurysm (AAA) are unknown. Here, we found that METTL3 knockdown in apolipoprotein E-deficient (*ApoE*<sup>-/-</sup>) mice treated with angiotensin II suppressed the formation of AAAs, while METTL3 overexpression exerted the opposite effects. Similar results were obtained in a calcium chloride (CaCl<sub>2</sub>)-induced mouse AAA model. Mechanistically, METTL3-dependent m<sup>6</sup>A methylation promoted primary microRNA-34a (miR-34a, pri-miR34a) maturation through DGCR8. Moreover, miR-34a overexpression significantly decreased SIRT1 expression and aggravated AAA formation, while miR-34a deficiency produced the opposite effects. In a rescue experiment, miR-34a knockdown or forced expression of SIRT1 partially attenuated the protective effects of METTL3 deficiency against AAA formation. Our studies reveal an important role for METTL3/m<sup>6</sup>A-mediated miR-34a maturation in AAA formation and provide a novel therapeutic target and diagnostic biomarker for AAA treatment.**

## INTRODUCTION

Abdominal aortic aneurysm (AAA) is a devastating disease with an overall prevalence of 6% in men and 1.6% in women and a mortality rate exceeding 80% after rupture despite surgical advancements.<sup>1,2</sup> Deferring the development of AAA is key to curbing the catastrophic consequences of this condition. In the clinic, lifestyle and metabolic improvements such as smoking cessation and control of high blood pressure and lipid and glucose levels are conventional measures to slow AAA development.<sup>2</sup> Controlling these risk factors does yield some benefits; however, there has been limited progress in reducing AAA morbidity and rupture rates because this approach is not drastic enough to effectively slow AAA development and is difficult to implement successfully in the real world. Blocking the pathogenesis of AAA

formation has been deemed a potential strategy for preventing or deferring AAA development and has gained attention in the endeavor to address AAA.

Current studies on the pathogenetic mechanism AAA indicate that AAA is induced by comprehensive aberrant expression of coding genes and noncoding genes.<sup>3-5</sup> Previous studies seeking proper targets for AAA therapy have focused on controlling AAA progression by manipulating the expression of coding genes and noncoding genes via regulation of the content of mRNAs or ncRNAs in tissues or organs.<sup>4-6</sup> Theoretically, the expression of genes is determined not only by the content of mRNAs or non-coding RNAs (ncRNAs) but also by posttranscriptional regulations; such regulations can lead to aberrant gene expression by regulating pre-mRNA maturation, mRNA stability, and mRNA translation in multiple pathophysiological processes. Posttranscriptional regulation-mediated maturation of pre-mRNA participates in vascular pathological processes including neointima formation after vascular injury,<sup>7</sup> atherosclerosis, and hypertension. In addition, in some cases, posttranscriptional modification even determines whether genes can be expressed in different biological processes. Splicing factors mediate the posttranscriptional regulating of CaV1.2 pre-mRNA to produce multiple functionally distinct mature mRNAs, namely, alternative splicing transcripts, which participate in various biological processes<sup>8</sup> such as atherosclerosis,<sup>9</sup> hypertension,<sup>10</sup> and cerebral arterial contraction.<sup>11</sup> However, the role of posttranscriptional regulation in AAA development remains unknown.

N6-methyladenosine (m<sup>6</sup>A) methylation, an important RNA posttranscriptional regulatory mechanism, is regarded as the most common posttranscriptional modification for mRNA<sup>12</sup> and as a general modification for ncRNA in eukaryotic organisms. m<sup>6</sup>A modification

Received 22 February 2020; accepted 5 June 2020;  
<https://doi.org/10.1016/j.omtn.2020.06.005>

**Correspondence:** Jianping Bin, Department of Cardiology, State Key Laboratory of Organ Failure Research, Nanfang Hospital, Southern Medical University, Guangzhou 510515, China.

**E-mail:** [jianpingbin@hotmail.com](mailto:jianpingbin@hotmail.com)

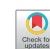

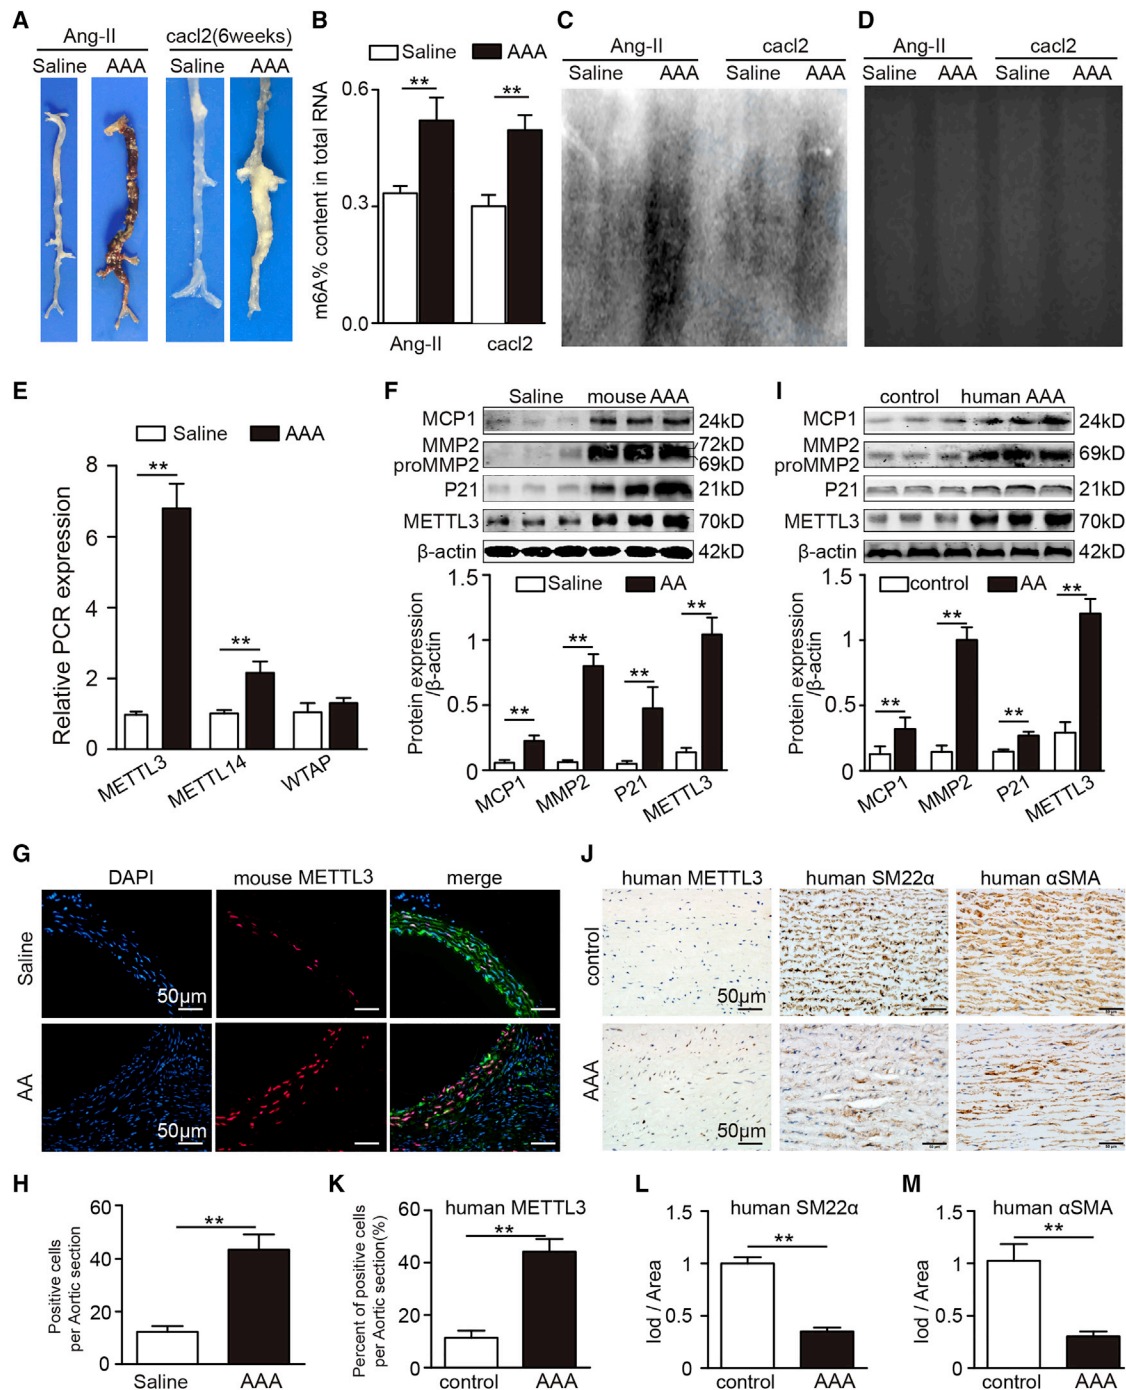

**Figure 1. m<sup>6</sup>A Modification and METTL3 Expression Are Upregulated in AAA**

(A) Representative photographs showing the macroscopic features of 4-week Ang II-induced AAA in male *ApoE*<sup>-/-</sup> mice or 6-week CaCl<sub>2</sub>-induced AAA in male C57BL/6J mice. (B) m<sup>6</sup>A modification of total RNA from AAA tissues and control aortic tissues (n = 5). (C) m<sup>6</sup>A modification of rRNA-free poly(A)<sup>+</sup> RNA from AAA tissues and control aortic tissues as detected by m<sup>6</sup>A immunoblot analysis. (D) Equal amounts of RNA from AAA tissues and control aortic tissues were stained with ethidium bromide. (E) mRNA levels of METTL3, METTL14, and Wilms tumour 1-associated protein (WTAP) in saline- or Ang II-induced mouse AAA samples (n = 4). (F) Western blot analysis of monocyte chemoattractant protein 1 (MCP1), matrix metalloproteinase 2 (MMP2), P21, and METTL3 in saline- or Ang II-induced mouse AAA homogenates (n = 4). (G) Representative immunofluorescent staining of METTL3, smooth muscle 22α (SM22α, green), and 4',6-diamidino-2-phenylindole (DAPI) in suprarenal aortas from saline- or Ang II-induced

(legend continued on next page)

of RNA exists within disease pathophysiological processes, promoting pri-microRNA (miRNA) maturation<sup>13</sup> and mRNA translation<sup>14</sup> and enhancing RNA stability.<sup>15</sup> Importantly, recent studies have also supported critical roles for m<sup>6</sup>A RNA modification in cardiovascular disorders and mechanisms such as cardiac hypertrophy<sup>16</sup> and cardiomyocyte regeneration.<sup>17</sup> Interestingly, our preliminary experiments revealed that RNA m<sup>6</sup>A methylation levels were upregulated in AAA samples compared to control samples and that this upregulation was induced by elevations in the expression of the m<sup>6</sup>A methyltransferase methyltransferase-like 3 (METTL3), indicating that m<sup>6</sup>A of RNA may participate in the progression of AAA. Recent studies have reported that METTL3 increased the expression of inflammatory cytokines and activated the nuclear factor  $\kappa$ B (NF- $\kappa$ B) signaling pathway,<sup>18,19</sup> which are implicated in AAA development. Moreover, METTL3 potentiates multiple pri-miRNA splicing to form mature miRNAs,<sup>13</sup> which are regarded as crucial and upregulated in aortic aneurysm formation. Given these findings, we hypothesize that METTL3 facilitates pri-miRNA maturation by promoting m<sup>6</sup>A RNA modification, and thus aggravates vascular inflammation and AAA formation.

## RESULTS

### m<sup>6</sup>A Modification and METTL3 Are Upregulated in AAA Tissues

To determine the potential role of m<sup>6</sup>A modification in AAA, we constructed an AAA model (Figure 1A) and examined the levels of m<sup>6</sup>A in the total RNA of angiotensin II (Ang II)-induced AAA tissues, CaCl<sub>2</sub>-induced AAA tissues and control aortic tissues. Using a colorimetric m<sup>6</sup>A quantification strategy, we found that there were more m<sup>6</sup>A modifications in AAA tissues than in control aortic tissues (Figure 1B). Then, we isolated poly(A)<sup>+</sup> RNA in AAA and adjacent control tissues and examined the m<sup>6</sup>A modifications by RNA immunoblotting. In addition, upon further rRNA depletion, we found that there were more m<sup>6</sup>A modifications of rRNA-free poly(A)<sup>+</sup> RNA in both AAA tissues than in control tissues (Figures 1C and 1D). Together, these results indicated that m<sup>6</sup>A modifications were upregulated in AAA. m<sup>6</sup>A modifications primarily depend on the balance between m<sup>6</sup>A methyltransferase and demethylase genes. Therefore, we investigated the expression levels of m<sup>6</sup>A methyltransferase and demethylase genes in AAA tissues and corresponding control aortic tissues. We found that the m<sup>6</sup>A methyltransferases METTL3 and METTL14 were significantly upregulated in AAAs (Figures 1E and 1F). To determine the localization of METTL3 in aortic tissues, we performed immunofluorescent staining for METTL3 and  $\alpha$ -SMA. The results showed that METTL3 was mainly located in the nuclei of vascular smooth muscle cells (VSMCs) (Figures 1G and 1H).

We further investigated the expression of METTL3 in human AAA tissues. Human AAA tissues and corresponding adjacent normal

aortic sections were obtained from patients undergoing AAA resection surgery. In agreement with the above mouse results, we found that the protein expression of METTL3 was markedly higher in AAA tissues than in control tissues (Figure 1I). In addition, immunohistochemical staining consistently showed that the expression levels of METTL3 were substantially higher in human aortic smooth muscle cells (SMCs) than in adjacent control aortic SMCs (Figures 1J to 1M). Taken together, our data showed upregulated METTL3 expression in both human and animal AAA.

### Reductions in METTL3 Suppress Ang II-Induced AAA Formation

To further determine whether there was a causative link between the reduction in METTL3 and AAA development, we used adeno-associated viruses (AAVs) carrying METTL3 small interfering RNA (siRNA; the sh-METTL3 group), overexpression plasmids (the AAV-METTL3 group) and control sequences (the scrambled RNA [Scr-RNA]) group, and the AAV-green fluorescent protein (GFP) group to perform gain- and loss-of-function experiments on Ang II-treated C57BL/6J or apolipoprotein E-deficient (*ApoE*<sup>-/-</sup>) mice. First, four METTL3 siRNA sequences and pcDNA3.1-METTL3 were separately and successfully transfected into cultured VSMCs. Analysis of the METTL3 mRNA levels in VSMCs showed that siRNA 1, siRNA 2, and pcDNA3.1-METTL3 were effective in inhibiting and promoting METTL3 expression (Figures S1A and S1B). Next, AAV9 vectors carrying METTL3 siRNA 1, overexpression plasmids, and control sequences were injected into the tail veins of *ApoE*<sup>-/-</sup> mice and C57BL/6J mice. Compared with that in the saline group, the GFP signal was significantly enhanced in the virus intervention groups, indicating that the virus successfully infected the aorta (Figures S2A and S2B). Moreover, from the 30th day to the 60th day, the sh-METTL3 group and the AAV-METTL3 group demonstrated significantly reduced and enhanced aortic METTL3 expression, respectively, compared with the corresponding control groups (Figures S2C and S2D; Figures 2A and 3A). Accordingly, on the 30th day, METTL3-deficient mice and METTL3-overexpressing mice were randomly selected to start receiving Ang II infusion for 4 weeks. After 2 weeks of Ang II treatment, the change in abdominal aortic diameter was monitored by ultrasound (Figure 2B). After 28 days of Ang II infusion, AAA formation was significantly reduced in the sh-METTL3 group (16 of 40 mice, 40%; 20 AAAs) compared with the Scr-RNA group (30 of 40 mice, 75%; 30 AAAs; Figures 2C and 2D). Compared with those in the Scr-RNA mice, the maximal abdominal aortic diameter and the elastin degradation score were remarkably reduced in Ang II-treated sh-METTL3 *ApoE*<sup>-/-</sup> mice (Figures 2E and 2F), although there were no noticeable effects on the systolic blood pressure of the mice (Figure S1E). In addition, knockdown of METTL3 markedly attenuated the levels of vascular macrophage infiltration (Figure 2E); the expression of MMP2 (Figures 2H and 2I; Figure 3A), MCP-1/CCL2 (Figure 2H; Figure S3B),

mouse AAAs (scale bars, 50  $\mu$ m). (H) Number of accumulated METTL3-positive cells in the suprarenal aortic walls of saline- or Ang II-infused mice (n = 4). Three different visual fields were captured for each section. (I) Representative western blot analyses of MCP1, MMP2, P21, and METTL3 in human AAA and adjacent nonaneurysmal aortic samples. (J–M) Representative immunostaining (J) and densitometric analysis of METTL3 (K), SM22 $\alpha$  (L), and  $\alpha$ -SMA (M) in human AAA samples and adjacent control aortas (n = 4; scale bars, 50  $\mu$ m). The data are presented as the mean  $\pm$  SD. \*p < 0.05, \*\*p < 0.01.

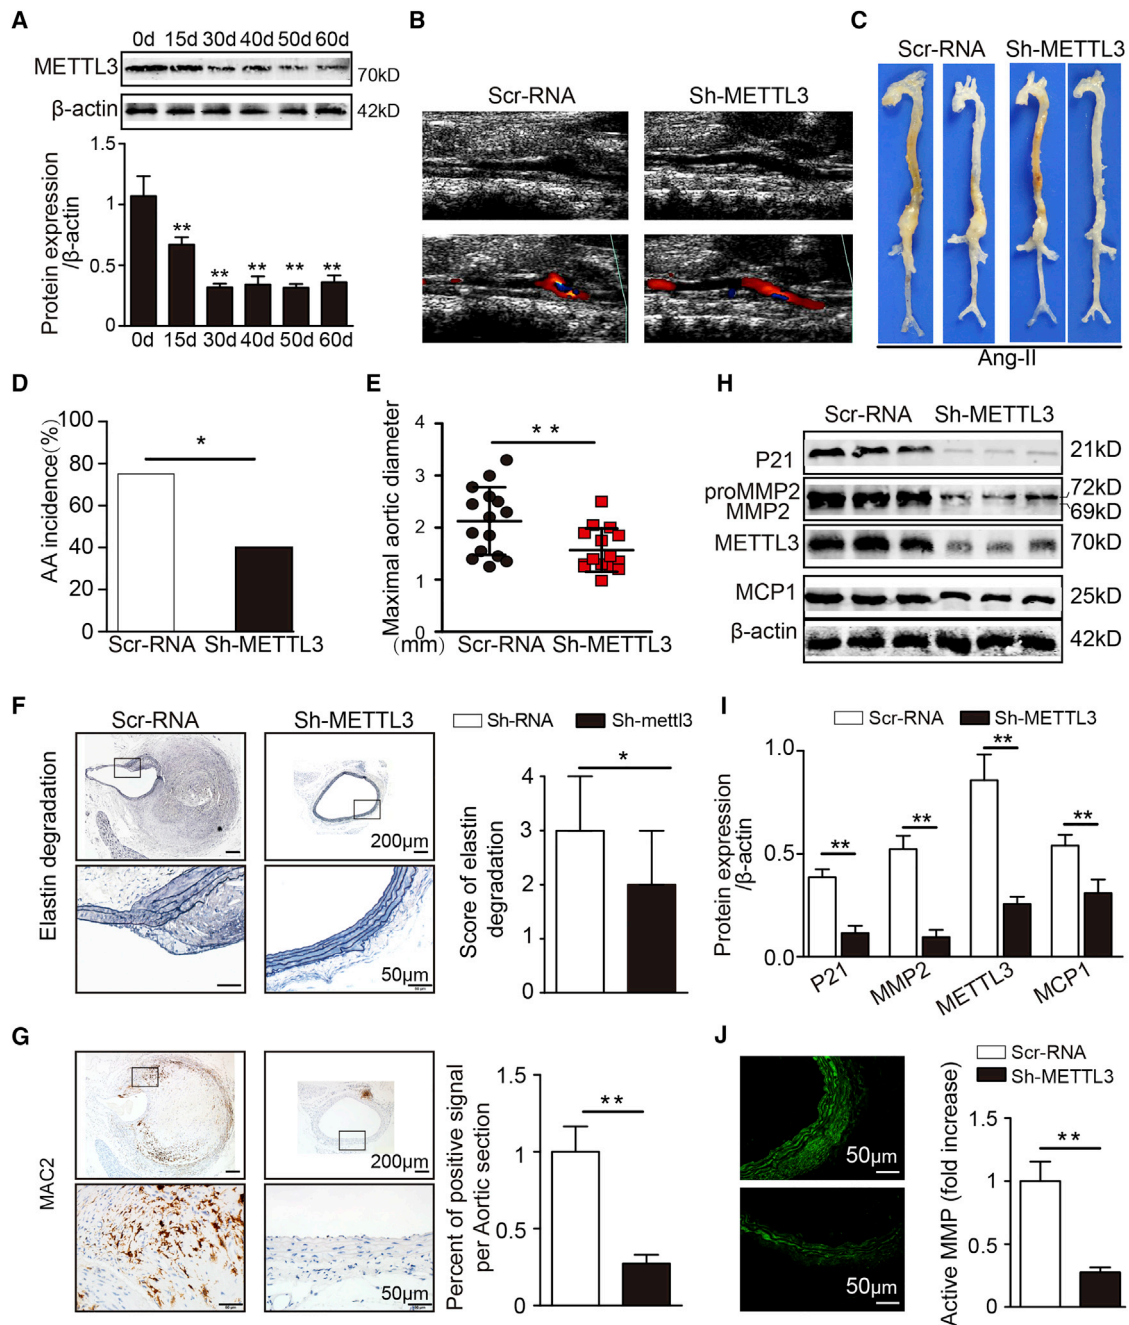

**Figure 2. METTL3 Reduction Prevents Ang II-Induced AAA Formation**

(A) Western blots showing the expression of METTL3 over time after sh-METTL3 transfection in the suprarenal aortas of *ApoE*<sup>-/-</sup> mice (n = 3). (B) Two-dimensional color-coded ultrasound imaging of AAAs after 14 days of Ang II treatment. (C) Representative photographs of the macroscopic features of AAAs in Ang II-infused *ApoE*<sup>-/-</sup> mice. (D) Statistical analysis of AAA incidence in Ang II-infused *ApoE*<sup>-/-</sup> mice. (E) Maximal aortic diameters in Ang II-infused *ApoE*<sup>-/-</sup> mice. (F) Representative elastin staining and elastin degradation scores in suprarenal aortas from Ang II-infused *ApoE*<sup>-/-</sup> mice. The magnified photographs were taken at the position where the most severe elastin degradation occurred (scale bars, 200 and 50 μm; magnified photographs). The data are presented as the medians and quartiles. \*p < 0.05. (G) Representative immunostaining for galectin 3 (MAC2, scale bars, 200 and 50 μm) and corresponding densitometric analysis (n = 4). (H and I) Western blots (H) and densitometric analysis (I) of the protein expression of METTL3, P21, MMP2, and MCP1 in Ang II-induced male *ApoE*<sup>-/-</sup> mice (n = 4). (J) Representative *in situ* zymography photographs of MMP activity in Ang II-induced male *ApoE*<sup>-/-</sup> mice (scale bars, 50 μm; n = 4). The data are presented as the mean ± SD. \*p < 0.05, \*\*p < 0.01.

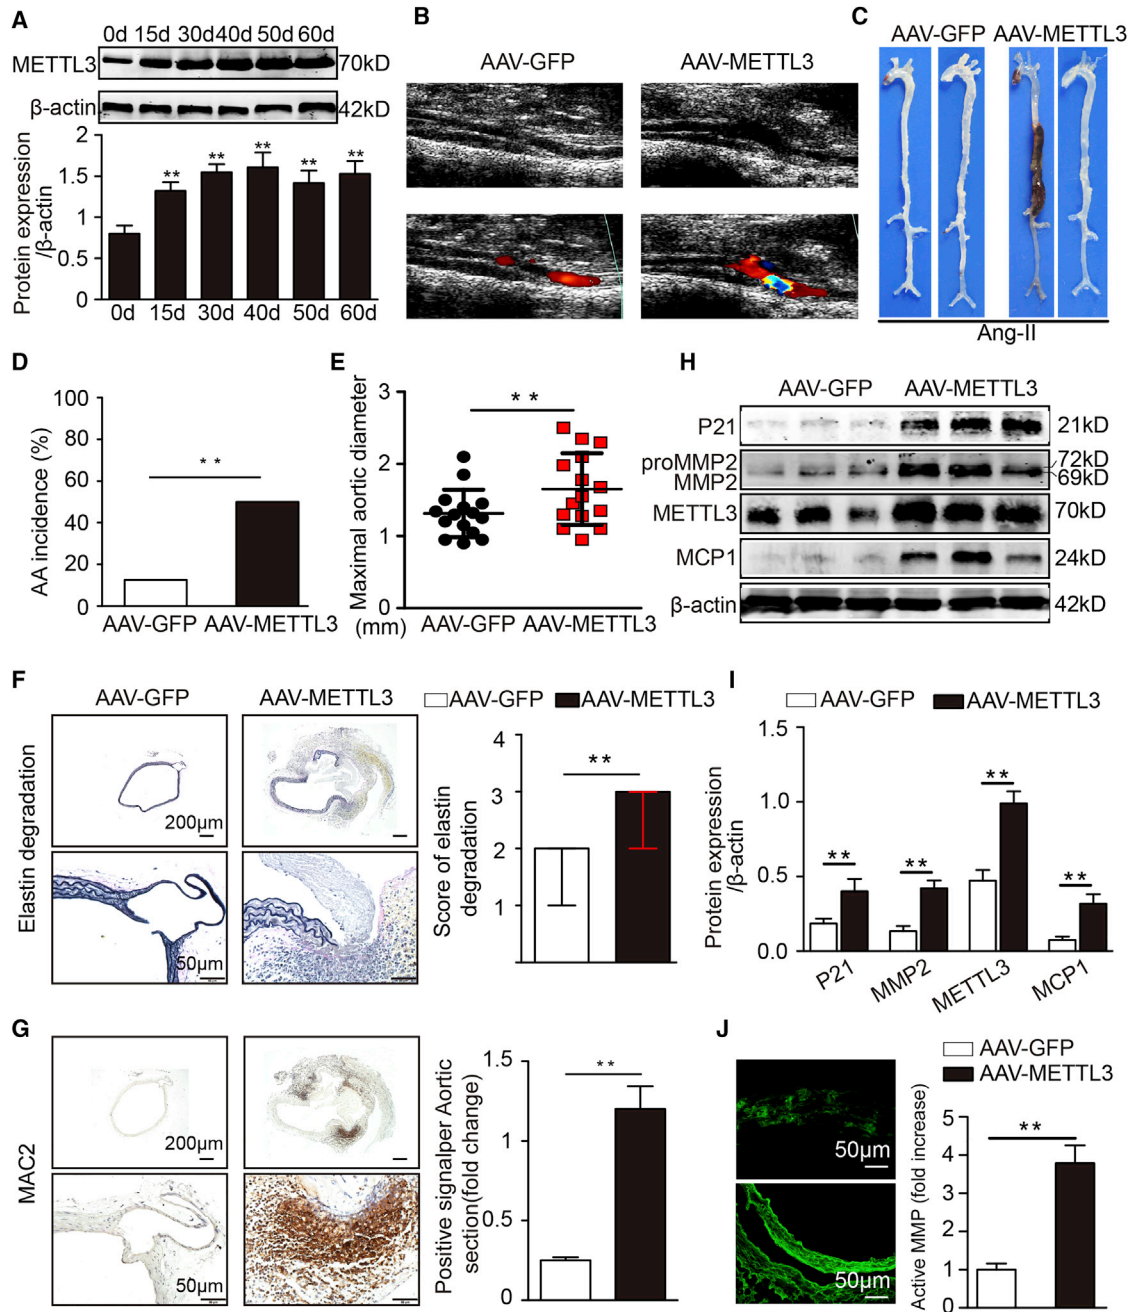

**Figure 3. METTL3 Overexpression Promotes Ang II-Infused AAA Formation**

(A) Western blots showing the expression of METTL3 over time after AAV-METTL3 transfection in the suprarenal aortas of Ang II-treated C57BL/6J mice ( $n = 3$ ). (B) Two-dimensional color-coded ultrasound imaging of AAAs after 14 days of Ang II treatment. (C) Representative photographs of the macroscopic features of AAAs in Ang II-infused C57BL/6J mice. (D) Statistical analysis of AAA incidence in Ang II-infused C57BL/6J mice. (E) Maximal aortic diameters in Ang II-infused C57BL/6J mice. (F) Representative elastin staining and elastin degradation scores in suprarenal aortas from Ang II-infused C57BL/6J mice. The magnified photographs were taken at the position where the most severe elastin degradation occurred (scale bars, 200 and 50  $\mu$ m; magnified photographs). The data are presented as the medians and quartiles. \*\* $p < 0.01$ . (G) Representative immunostaining for MAC2 (scale bars, 200 and 50  $\mu$ m) and corresponding densitometric analysis ( $n = 4$ ). (H and I) Western blots (H) and densitometric analysis (I) of the protein expression of METTL3, P21, MMP2, and MCP1 in Ang II-induced male C57BL/6J mice ( $n = 4$ ). (J) Representative *in situ* zymography photographs of MMP activity in Ang II-induced male C57BL/6J mice (scale bars, 50  $\mu$ m;  $n = 4$ ). The data are presented as the mean  $\pm$  SD. \* $p < 0.05$ , \*\* $p < 0.01$ .

and P21 (Figure 2H); and the activity of MMPs (Figure 2J) in Ang II-treated *ApoE*<sup>-/-</sup> mice.

Moreover, a gain-of-function experiment was carried out in C57BL/6J mice. The dilation of the abdominal aorta was monitored by ultrasound on the 14<sup>th</sup> day of Ang II infusion (Figure 3B). On the 28<sup>th</sup> day of Ang II treatment, METTL3-overexpressing mice had significantly higher AAA incidence (18 of 40 mice, 45%; 15 AAAs) than control mice (5 of 40 mice, 12.5%; 5 AAAs; Figures 3C and 3D). Correspondingly, the maximal aortic diameter and the elastin degradation score were evidently increased in the AAV-METTL3 group compared with the AAV-GFP group (Figures 3E and 3F). Additionally, compared with those in Ang II-treated C57BL/6J mice, the levels of vascular macrophage infiltration (Figure 3G), MMP2 expression (Figures 3H and 3I; Figure S4A), MCP-1/CCL2 expression (Figures 3H and 3I; Figure S4B), P21 expression (Figures 3H and 3I), and MMP activity (Figure 3J) in Ang II-treated METTL3-overexpressing mice were increased, but there were no marked effects on systolic blood pressure (Figure S1F). Based on these findings, METTL3 deficiency ameliorates AAA formation and related pathological changes, while METTL3 overexpression elicits the opposite effects.

#### Disruption of METTL3 Inhibits Calcium-Chloride-Induced AAA Formation

Furthermore, the role of vascular METTL3 in AAA formation independent of Ang II was also determined in a CaCl<sub>2</sub>-induced AAA model. 6 weeks after CaCl<sub>2</sub> treatment in the infrarenal aorta, METTL3-deficient mice demonstrated decreased maximal abdominal aortic diameters (Figures S5A and S5B). As expected, mouse aortic METTL3 protein expression was clearly downregulated in the sh-METTL3 group compared to the control group (Figure S5C). The elastin degradation scores were also lower in the sh-METTL3 group than in the control group (Figures S5D and S5E). Moreover, METTL3, MCP1, MMP2, and P21 expression (Figures S5H, S6A, and S6B) and macrophage infiltration (Figures S5F and S5G), as detected by immunohistochemical staining, were also significantly reduced in METTL3-deficient mice compared with control mice. In contrast, 3 weeks after CaCl<sub>2</sub> treatment, METTL3-overexpressing mice displayed markedly higher maximal abdominal aortic diameters and elastin degradation scores than AAV-GFP mice (Figures S7A, S7B, S7D, and S7E); substantial increases in the expression of METTL3, MCP1, MMP2, and P21 (Figures 7C, 7H, S8A, and S8B) and in the levels of macrophage infiltration (Figures S7F and S7G) were also observed. These results indicate that knockdown of METTL3 exerts a protective effect against CaCl<sub>2</sub>-induced AAA formation.

#### METTL3-Dependent m<sup>6</sup>A Methylation Regulates the Processing of miR34a

Previous studies have demonstrated that m<sup>6</sup>A modification can mark pri-miRNAs for processing in a manner dependent on METTL3/m<sup>6</sup>A/DGCR8 or METTL14/m<sup>6</sup>A/DGCR8, suggesting that alteration of METTL3/m<sup>6</sup>A or METTL14/m<sup>6</sup>A might lead to abnormal expression of miRNAs in many pathophysiological processes, including

vascular disease. Given the key roles of miRNAs in AAA,<sup>20,21</sup> we hypothesized that METTL3 might influence AAA formation by affecting AAA-related miRNAs through m<sup>6</sup>A-dependent pri-miRNA processing. We confirmed that METTL3 was required for the binding of pri-miRNAs to the microprocessor protein DGCR8 in VSMCs. As expected, the results of the immunoprecipitation assay showed that METTL3 coprecipitated with DGCR8 from VSMCs. In addition, ribonuclease treatment weakened the interaction, suggesting that this interaction might be partly mediated by RNA (Figure 4A). Then, we determined whether METTL3 alters the binding of methylated RNAs to DGCR8 in VSMCs. Consistently, we observed significant decreases in the amount of methylated RNA bound to DGCR8 in METTL3-knockdown cells compared to control cells (Figure 4B). As expected, RNA m<sup>6</sup>A dot blot analyses showed that METTL3 has a key role in catalyzing the formation of m<sup>6</sup>A (Figure 4C). These findings suggest that METTL3 might also manipulate pri-miRNA processing by regulating the recognition and binding of DGCR8 to pri-miRNAs in VSMCs. Furthermore, we found that many miRNAs were aberrantly expressed in AAA, and we sought to identify the pri-miRNAs modified by the m<sup>6</sup>A mark through m<sup>6</sup>A-seq of nuclear RNA. We collected and mined m<sup>6</sup>A-seq data for nuclear RNA and miRNA microarray data for AAA tissues from the Gene Expression Omnibus database of the National Center for Biotechnology Information (GEO: GSE60213, GSE51228, and GSE54943). We found that 10 miRNAs were significantly upregulated and 2 were significantly downregulated in AAA samples compared to control samples, and the pri-miRNA of all the differentially regulated miRNAs contained m<sup>6</sup>A tags. We then measured the miRNAs in METTL3-knockdown VSMCs and found that miR34a was significantly downregulated in METTL3-knockdown VSMCs (Figure 4D). Moreover, based on previous reports of the important function of miR-34a in promoting vascular senescence and age-associated proinflammatory secretory factor expression and the finding that miR-34a could inhibit SIRT1 in VSMCs, we inferred that METTL3 might participate in AAA formation via miR-34a.

Moreover, we examined the expression of miR34a and pri-miR34a in METTL3-knockdown or METTL3-overexpressing VSMCs. As expected, pri-miR34a levels were increased in METTL3-knockdown cells and decreased in METTL3-overexpressing cells. Compared with pri-miR34a, mature miR34a exhibited the opposite expression patterns in METTL3-knockdown and METTL3-overexpressing cells (Figures 4D and 4E). We also observed increased binding of pri-miR34a to DGCR8 in METTL3-overexpressing cells when we immunoprecipitated DGCR8 from these cells, and we measured pri-miR34a expression by qRT-PCR (Figure 4F). Moreover, when we immunoprecipitated m<sup>6</sup>A from RNA of control and METTL3-overexpressing cells, we found that METTL3 overexpression significantly increased the amount of pri-miR34a modified by m<sup>6</sup>A at three m<sup>6</sup>A sites (Figures 4G and 4H). Consistent with those of previous studies, our results showed that miR34a was upregulated in AAA. Together, these results indicated that m<sup>6</sup>A marks facilitate pri-miR34a recognition by DGCR8 and subsequent processing into mature miRNA and that METTL3 promotes AAA formation via miR34a.

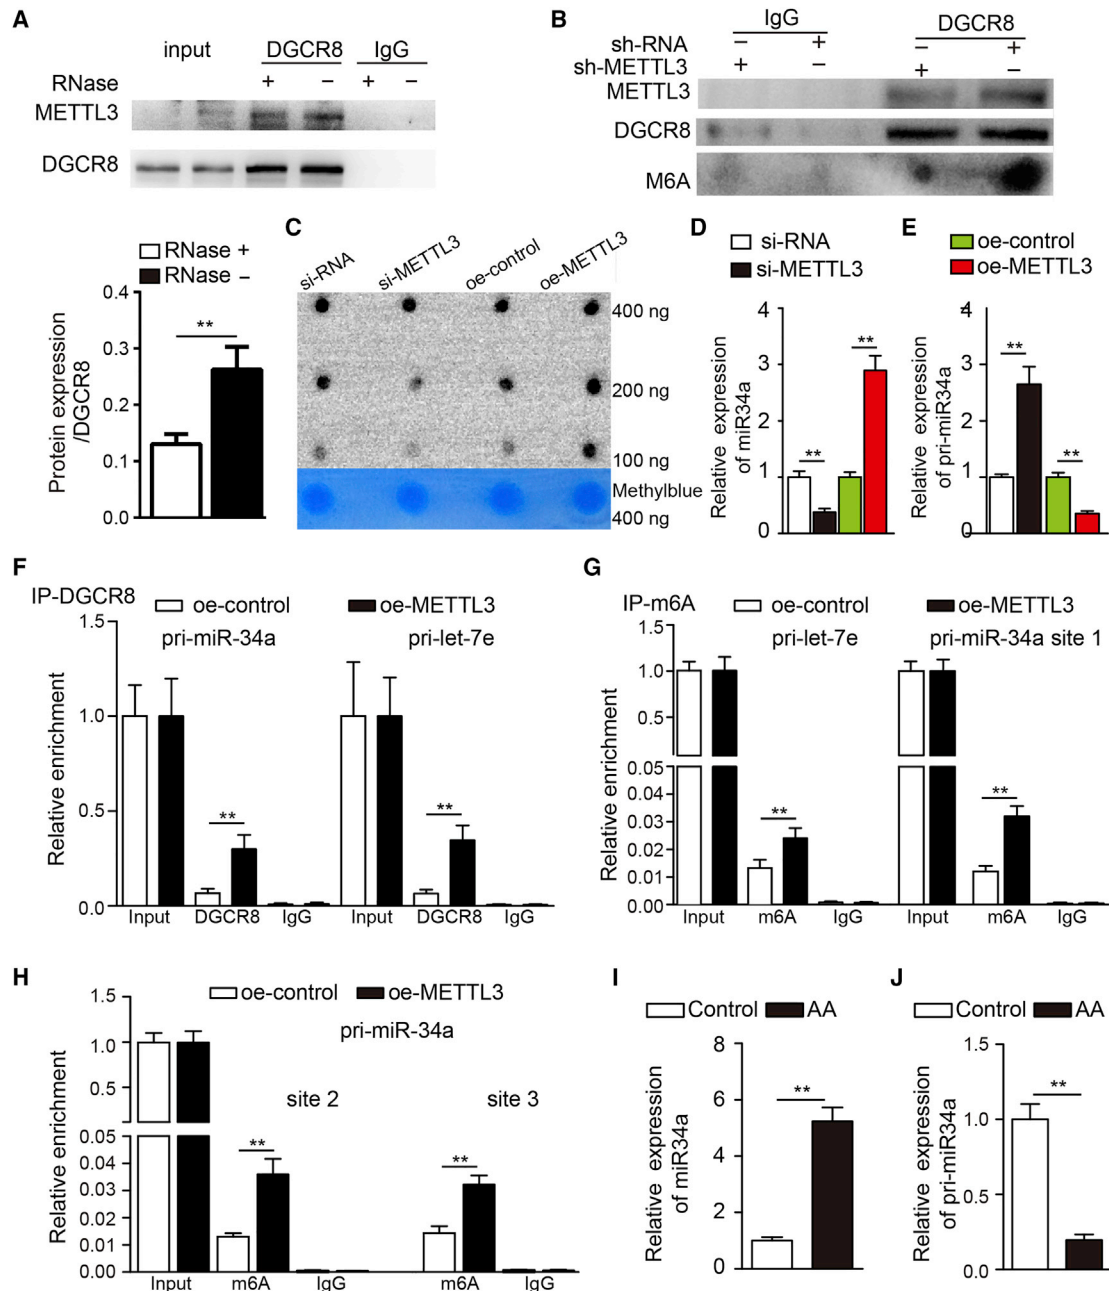

**Figure 4. METTL3-Dependent m<sup>6</sup>A Methylation Regulates the Processing of miR34a**

(A) Coimmunoprecipitation of the METTL3-interacting protein DGCR8 in VSMCs. An IgG antibody was used as a control for immunoprecipitation. (B) Immunoprecipitation of DGCR8, METTL3, and associated RNA from control VSMCs or METTL3-deficient VSMCs. (C) Poly(A)<sup>+</sup> RNA isolated from METTL3-deficient or METTL3-overexpression VSMCs was used in RNA m<sup>6</sup>A dot blot analyses with an m<sup>6</sup>A antibody. (D and E) quantitative real-time PCR analysis to detect the expression of miR34a (D) and pri-miR34a (E) in sh-METTL3 cells, METTL3-overexpressing cells and corresponding control cells. (F) Immunoprecipitation of DGCR8-associated RNA from METTL3-knockdown VSMCs or control cells followed by quantitative real-time PCR analysis of pri-miR34a binding to DGCR8. Pri-let-7e was used as a positive control (n = 3). (G) Immunoprecipitation of m<sup>6</sup>A-modified RNA in METTL3-knockdown VSMCs or control cells followed by quantitative real-time PCR analysis of pri-let-7e (left) and m<sup>6</sup>A modification site 1 of pri-miR34a (right) m<sup>6</sup>A modification levels. (H) Immunoprecipitation of m<sup>6</sup>A-modified RNA in METTL3-knockdown VSMCs or control cells followed by quantitative real-time PCR analysis of m<sup>6</sup>A modification site 2 (left) and m<sup>6</sup>A modification site 3 (right) of pri-miR34a m<sup>6</sup>A modification levels. (I and J) quantitative real-time PCR analysis of the expression of miR34a (I) and pri-miR34a (J) in human AAA tissues and control aortic tissues. The data are presented as the mean  $\pm$  SD. \*p < 0.05, \*\*p < 0.01.

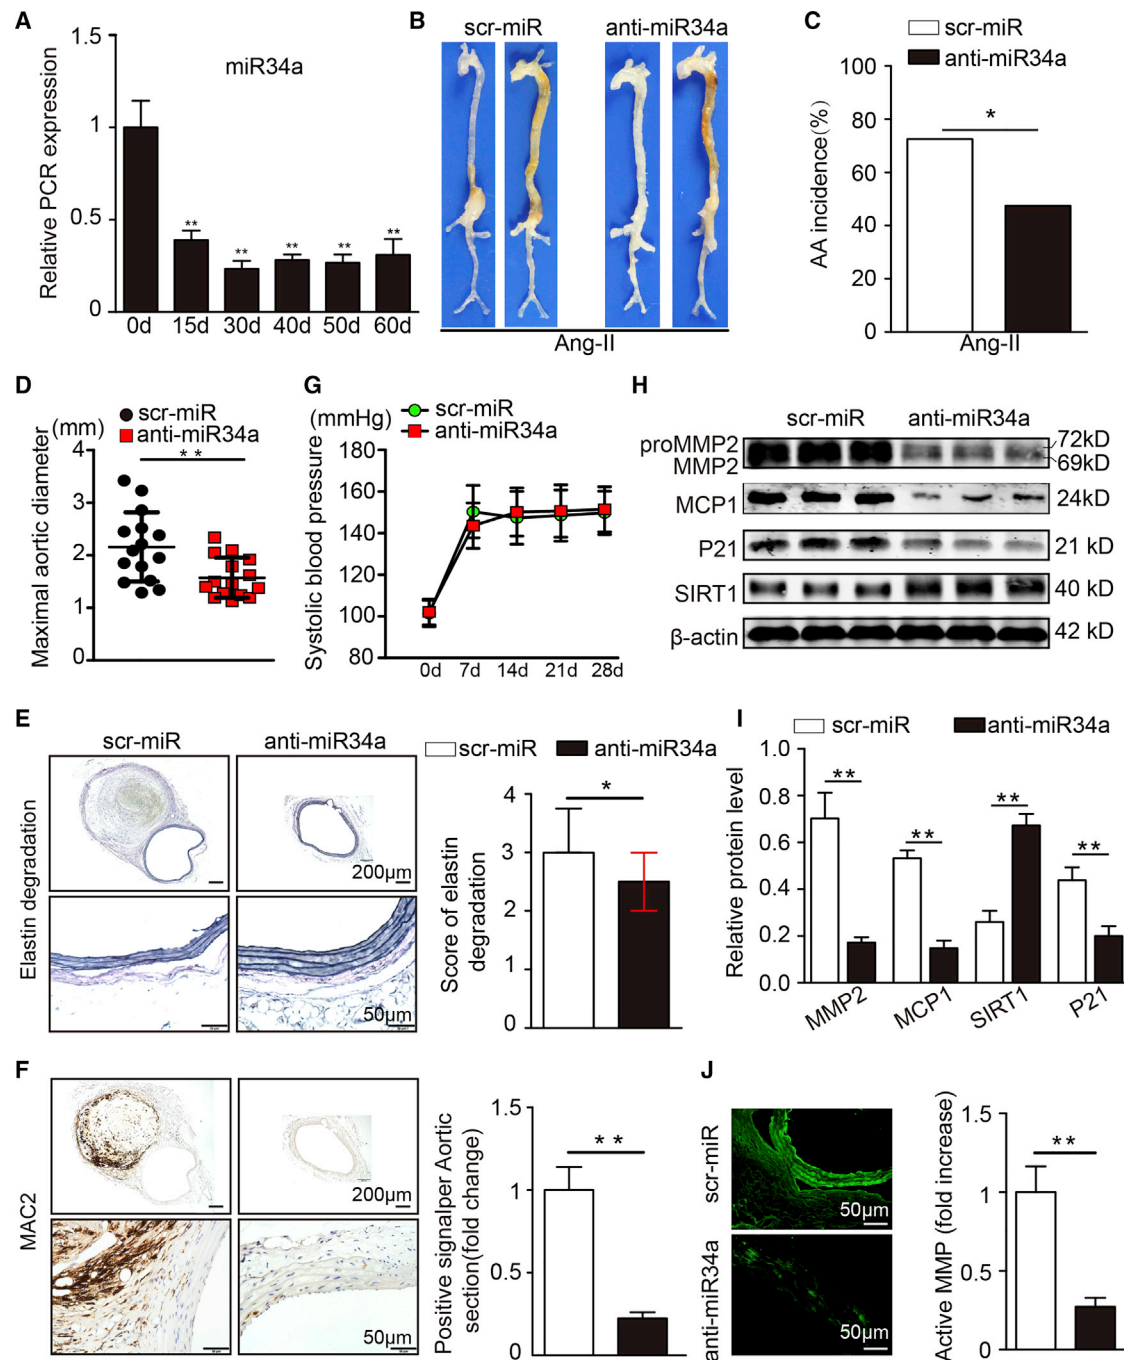

**Figure 5. Reductions in miR34a Suppress Ang II-Induced AAA Formation**

(A) miR34a levels after anti-miR34a virus infection of the suprarenal aortas of Ang II-infused *ApoE*<sup>-/-</sup> mice (n = 4). (B) Representative photographs of the macroscopic features of AAAs in Ang II-infused *ApoE*<sup>-/-</sup> mice. (C) Statistical analysis of AAA incidence in Ang II-infused *ApoE*<sup>-/-</sup> mice. (D) Maximal aortic diameters in Ang II-infused *ApoE*<sup>-/-</sup> mice. (E) Representative elastin staining and elastin degradation scores in suprarenal aortas from Ang II-infused *ApoE*<sup>-/-</sup> mice. The magnified photographs were taken at the position where the most severe elastin degradation occurred (scale bars, 200 and 50  $\mu$ m; magnified photographs). The data are presented as the medians and quartiles. \*p < 0.05. (F) Representative immunostaining for MAC2 (scale bars, 200 and 50  $\mu$ m) and corresponding densitometric analysis (n = 4). (G) Systolic blood pressure at baseline, and at 7, 10, 14, 21, and 28 days after Ang II infusion (n = 10 in each group). (H and I) Western blots (H) and densitometric analysis (I) of the protein expression of MMP2, MCP1, P21, and SIRT1 in Ang II-infused male *ApoE*<sup>-/-</sup> mice (n = 4). (J) Representative *in situ* zymography photographs of MMP activity in Ang II-infused male *ApoE*<sup>-/-</sup> mice (scale bars, 50  $\mu$ m; n = 4). The data are presented as the mean  $\pm$  SD. \*p < 0.05, \*\*p < 0.01.



### Reductions in miR34a Suppress Ang II-Induced AAA Formation

We further explored the role of miR-34a in AAA development as a downstream target of METTL3. We treated miR-34a-deficient mice and miR-34a-overexpressing mice with AAV9 vectors carrying miR34a mimic (AAV-miR-34a), inhibitor (anti-miR-34a), or control sequences (AAV-GFP and scr-miR) by tail vein injection. As expected, the GFP signal was markedly increased in virus-treated mice compared with saline-treated mice, indicating that the virus successfully infected the aorta (Figure S10). In addition, compared with the corresponding control groups, significant reductions and enhancements in aortic miR-34a expression were observed in the anti-miR-34a group and the AAV-miR-34a group, respectively, from the 30th day to the 60th day (Figures 5A and 6A). Therefore, on the 30th day, miR-34a-deficient mice were randomly selected to start receiving 4 weeks of Ang II infusion. After Ang II infusion, the miR-34a-deficient mice exhibited a lower incidence of AAA development (29 of 40 mice, 72.5%; 29 AAAs) than the control mice (19 of 40 mice, 47.5%; 19 AAAs; Figures 5B and 5C). Consistently, the maximal abdominal aortic diameters, the elastin degradation scores and vascular macrophage infiltration were markedly reduced in Ang II-treated miR-34a-deficient *ApoE*<sup>-/-</sup> mice (Figures 5D to 5F). As expected, Ang II treatment increased systolic blood pressure in both groups, and there was no notable difference in systolic blood pressure between the two groups (Figure 5G). Moreover, miR-34a deficiency markedly inhibited SIRT1 expression, MMP2 expression, MCP-1/CCL2 expression, and P21 expression, and MMP activity (Figures 5G to 5J; Figures S11A and S11B). These results indicate that knockdown of miR-34a suppresses Ang II-induced AAA formation and related pathological changes.

Furthermore, a gain-of-function experiment was performed in C57BL/6J mice. We treated miR-34a-overexpressing mice and corresponding control mice with Ang II for 4 weeks. Ang II infusion for 4 weeks caused AAAs in 11.4% (4/35) of the C57BL/6J mice (Figures 6B and 6C); AAA development was promoted by forced expression of miR-34a (14 of 35 mice, 40%; 14 AAAs). Moreover, miR-34a-overexpressing mice had larger maximal abdominal aortic diameters, higher elastin degradation scores, and more vascular macrophage infiltration (Figures 6D to 6F) than control mice. Accordingly, we found that forced expression of miR-34a enhanced MMP2 expression, MCP-1/CCL2 expression, P21 expression, and MMP activity (Figures 6H to 6J; Figures S12A and S12B). These results indicate that miR34a exacerbates AAA formation and related pathological changes.

### miR34a Promotes AAA by Inhibiting SIRT1

Next, we sought to determine the potential mechanism by which miR34a promotes AAA formation. Studies have shown that miR34a induces VSMC senescence through downregulation of SIRT1 and promotion of the expression of age-associated proinflammatory secretory factors<sup>22</sup> and that miR-34a can inhibit SIRT1 in VSMC or vascular disease.<sup>23,24</sup> Thus, we sought to determine whether miR34a promotes AAA formation by inhibiting SIRT1 expression. We carried out rescue experiments by using the SIRT1 antagonist EX527 1 day before the beginning of 28 days of Ang II treatment in

C57BL/6J mice. We observed that compared with DMSO administration, EX527 administration attenuated the promoting effect of miR34a overexpression on AAA formation, aortic expansion, elastin degradation, and vascular macrophage infiltration (Figures 7A–7F). Correspondingly, lower expression of MMP2, MCP1, and P21 was observed in EX527-treated mice than in DMSO-treated mice (Figures 7H–7L). The above results indicate that miR34a exacerbates AAA formation by inhibiting SIRT1.

### METTL3 Overexpression Promotes AAA via miR34a/SIRT1

To determine the essential role of miR34a/SIRT1 in METTL3 overexpression-mediated AAA formation, we carried out rescue experiments in METTL3-overexpressing mice. METTL3-overexpressing mice were separately treated with anti-miR or anti-miR34a followed by 28 days of Ang II infusion. After 28 days, we observed that compared with anti-miRNA administration, anti-miR34a administration attenuated the promoting effect of METTL3 overexpression on AAA formation, aortic expansion, elastin degradation, and vascular macrophage infiltration (Figures 8A–8F). Correspondingly, lower expression of MMP2, MCP1, and P21 was observed in anti-miR34a-treated mice than in anti-miRNA-treated mice (Figures 8H–8L). In addition, METTL3-overexpressing mice were separately treated with AAV-GFP or AAV-SIRT1 followed by 28 days of Ang II infusion. After 28 days, compared with AAV-GFP administration, AAV-SIRT1 administration also inhibited the promoting effect of METTL3 overexpression on AAA formation, aortic expansion, elastin degradation, and vascular macrophage infiltration (Figure S13A–S13G). SIRT1 overexpression inhibited the increased expression of MMP2, MCP1, and P21 caused by METTL3 overexpression (Figure S13H). As expected, our results showed that SIRT1 was substantially upregulated in METTL3 knockdown samples but downregulated in METTL3 overexpression samples. The higher expression of SIRT1 was found in human AAA tissues than in normal human aortic tissues. Taken together, our results indicate that miR34a/SIRT1 is involved in METTL3 overexpression-promoted AAA development.

### DISCUSSION

In the present study, we revealed that METTL3-mediated pri-miRNA maturation is a potent instigator of AAA formation. We showed that the m<sup>6</sup>A levels of RNA were upregulated in AAA samples and that METTL3 was the main factor in the aberrant m<sup>6</sup>A modification in AAAs. Downregulation of METTL3 reduced vascular inflammation and AAA formation in two AAA models. Mechanistically, METTL3 promoted AAA formation by accelerating the pri-miR34a maturation process in a DGCR8-dependent manner and thus inhibiting the expression of SIRT1, the target gene of miR34a.

In our study, we fully demonstrated that the m<sup>6</sup>A methyltransferase METTL3, an important mediator of RNA posttranslational modification, promoted AAA formation in two accepted AAA models. We found that METTL3 deficiency significantly reduced Ang II-induced AAA formation in *ApoE*<sup>-/-</sup> mice with hyperlipidemia. Moreover, METTL3 overexpression substantially alleviated the progression of

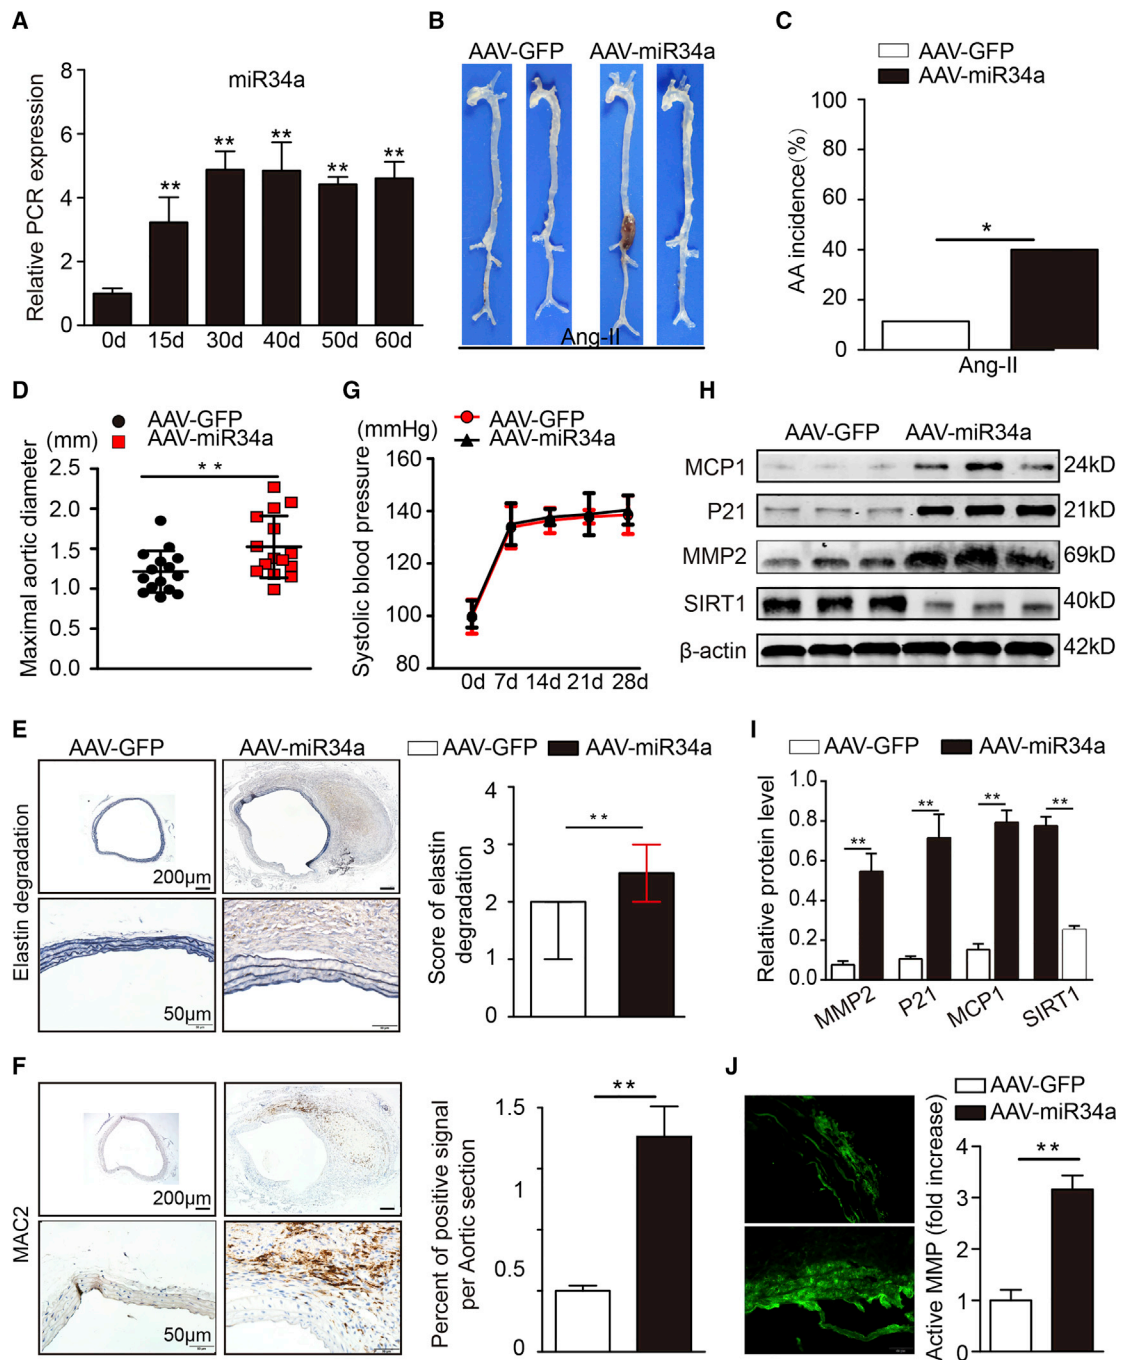

**Figure 6. Overexpression of miR34a Aggravates Ang II-Induced AAA Formation**

(A) Quantitative real-time PCR analysis of the expression of miR34a after AAV-miR34a virus infection of the suprarenal aortas of Ang II-infused C57BL/6J mice (n = 3). (B) Representative photographs of the macroscopic features of AAAs in Ang II-infused C57BL/6J mice. (C) Statistical analysis of AAA incidence in Ang II-infused C57BL/6J mice. (D) Maximal aortic diameters in Ang II-infused C57BL/6J mice. (E) Representative elastin staining and elastin degradation scores in suprarenal aortas from Ang II-infused C57BL/6J mice. The magnified photographs were taken at the position where the most severe elastin degradation occurred (scale bars, 200 and 50  $\mu$ m; magnified photographs). The data are presented as the medians and quartiles. \*\*p < 0.01. (F) Representative immunostaining for MAC2 (scale bars, 200 and 50  $\mu$ m) and the corresponding densitometric analysis (n = 4). (G) Systolic blood pressure at baseline and at 7, 10, 14, 21, and 28 days after Ang II infusion (n = 10 in each group). (H and I) Western blots (H) and densitometric analysis (I) of the protein expression of MMP2, MCP1, P21, and SIRT1 in Ang II-infused male C57BL/6J mice (n = 4). (J) Representative *in situ* zymography photographs of MMP activity in Ang II-infused male C57BL/6J mice (scale bars, 50  $\mu$ m; n = 4). The data are presented as the mean  $\pm$  SD. \*p < 0.05, \*\*p < 0.01.

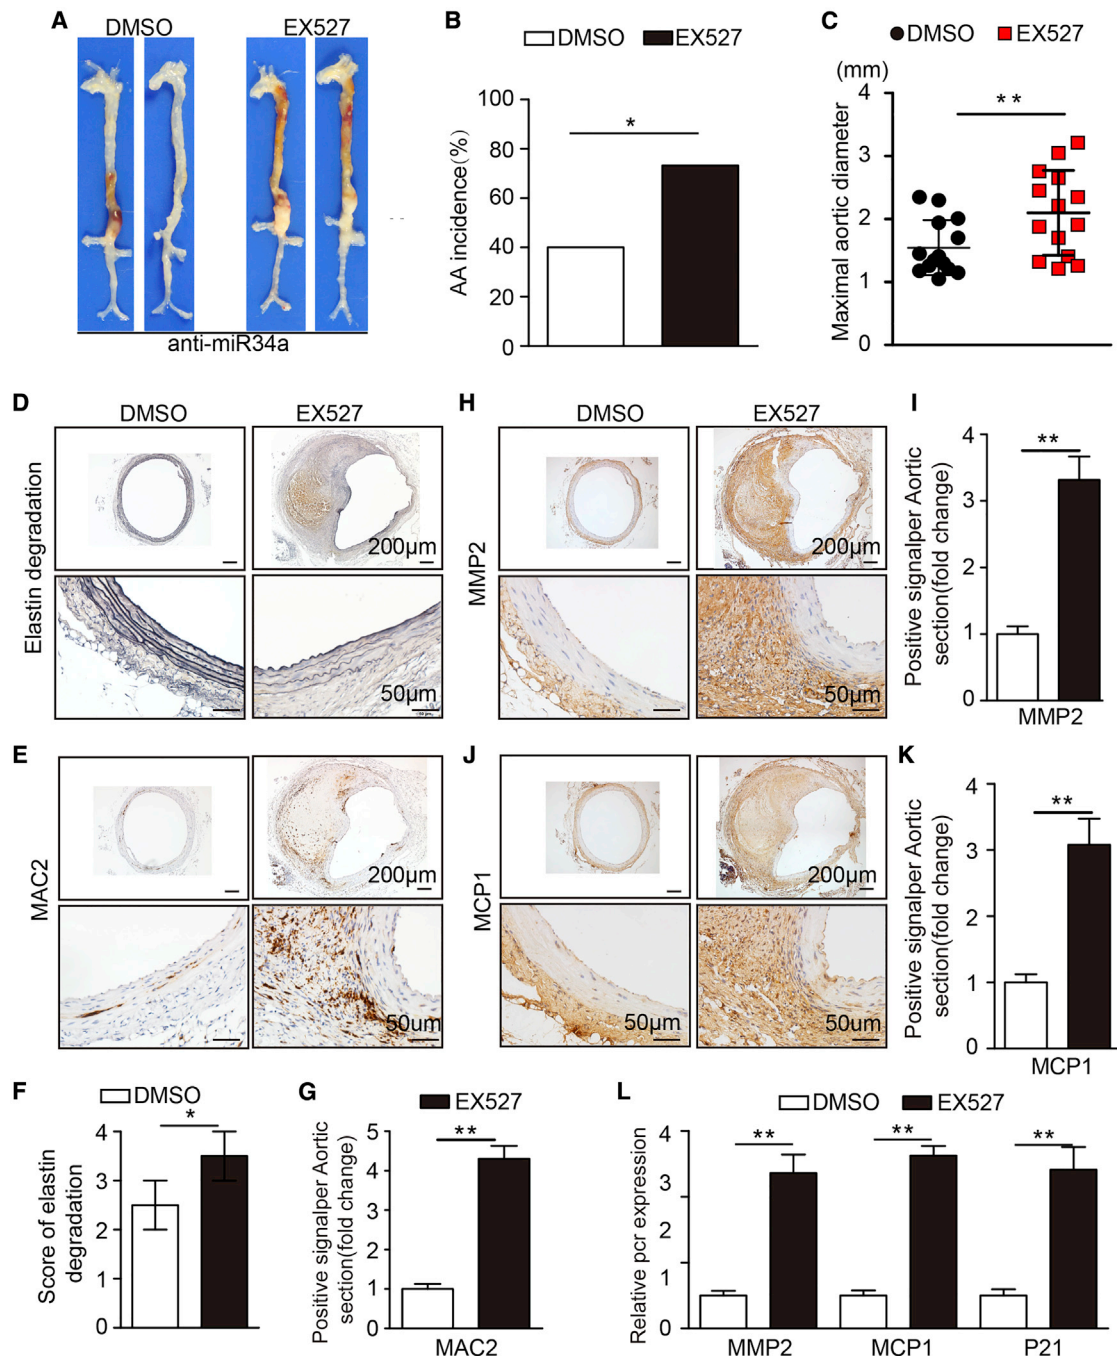

**Figure 7. miR34a Promotes AAA by Inhibiting SIRT1**

(A) Representative photographs of the macroscopic features of AAAs in Ang II-infused DMSO- or EX527-treated C57BL/6J mice after anti-miR34a virus infection. (B) Statistical analysis of AAA incidence in Ang II-infused DMSO- or EX527-treated C57BL/6J mice. (C) Maximal aortic diameters in the Ang II-infused C57BL/6J mice in the two groups. (D and F) Representative elastin staining (D) and elastin degradation scores (F) in suprarenal aortas from Ang II-infused C57BL/6J mice. The magnified photographs were taken at the position where the most severe elastin degradation occurred (scale bars, 200 and 50  $\mu$ m; magnified photographs). (E and G) Representative immunostaining for MAC2 (E) (scale bars, 200 and 50  $\mu$ m) and the corresponding densitometric analysis (G) ( $n = 4$ ). (H–K) Representative immunostaining and densitometric analysis for MMP2 (H and I) and MCP1 (J and K) (scale bars, 200 and 50  $\mu$ m;  $n = 4$ ). (L) Relative mRNA expression of MMP2, MCP1, and P21 in Ang II-infused DMSO- or EX527-treated C57BL/6J mouse aortas. ( $n = 4$ ). The data are presented as the mean  $\pm$  SD. \* $p < 0.05$ , \*\* $p < 0.01$ .

both Ang II- and CaCl<sub>2</sub>-induced AAA even in mice with nonhyperlipidemic background. Taken together, these results show that the role of METTL3 in AAA formation is independent of a specific pathological environment. Furthermore, we found that METTL3 knockdown inhibited aortic enlargement, elastin degradation, and inflammatory activation, which are major drivers of the progression of AAA.<sup>25,26</sup> Lending support to our findings, METTL3 has previously been shown to contribute to the activation of inflammation in bladder cancer<sup>18</sup> and the lipopolysaccharide inflammatory response.<sup>19</sup> Notably, METTL3 deficiency or overexpression had no effect on blood pressure, indicating that the effect of METTL3 on Ang II-induced AAA incidence is independent of alterations in blood pressure. In addition, with the innovation of detection technology, m<sup>6</sup>A modification can easily be detected, which enables the RNA m<sup>6</sup>A modification to be used as a diagnostic biomarker of AAA. Compared to the strategy used in previous studies to estimate AAA progression, which involved assessment of alterations in the expression levels of certain genes, assessment of the levels of global RNA m<sup>6</sup>A modification has unique advantages. RNA m<sup>6</sup>A modification, which is controlled by multiple genes, tends to exhibit less heterogeneity among individuals than single gene expression levels. Taken together, these findings suggest that METTL3 might be a novel therapeutic target and diagnostic biomarker for AAA.

We further demonstrated that METTL3 aggravated AAA formation by participating in the posttranscriptional modification of pri-miRNAs, namely, by promoting the maturity of AAA-related miRNAs. In recent years, an increasing number of studies have demonstrated that miRNAs reduce target gene expression to play relevant roles in various pathophysiological processes, including AAA.<sup>27,28</sup> Importantly, mature miRNAs, but not unprocessed miRNAs, are loaded onto the RNA-inducing silencing complex (RISC) to silence target genes in biological processes, strongly supporting our hypothesis that targeting RNA maturation might be an attractive therapeutic strategy AAA. In the current study, we demonstrated that the role of METTL3 in AAA formation relies on facilitation of miR34a maturation through m<sup>6</sup>A/DGCR8-dependent pri-miRNA processing. After mining m<sup>6</sup>A-seq data from nuclear RNA and miRNA microarray data from AAA, we found that ten upregulated miRNAs and two downregulated miRNAs contained m<sup>6</sup>A tags in their pri-miRNAs; thus, these miRNAs have the potential to be regulated by METTL3. Among these miRNAs, we found that mature miR-34a was the most downregulated miRNA in METTL3-knockdown mice and that overexpression of METTL3 promoted its expression. Correspondingly, pri-miR-34a accumulated upon METTL3 deficiency and was reduced in METTL3-overexpressing mice. These results suggest that METTL3 may promote the processing of mature miR34a in an m<sup>6</sup>A-dependent manner, as supported by several other experiments. First, we predicted m<sup>6</sup>A sites based on the sequence of pri-miR34a with Database:SRAMP (<http://www.cuilab.cn/sramp>).<sup>29</sup> The methylated RNA immunoprecipitation and qRT-PCR results demonstrated that the m<sup>6</sup>A levels of pri-miR34a were increased in AAAs and METTL3-overexpressing VSMCs compared to control samples, while those in METTL3-deficient VSMCs were decreased.

Moreover, the immunoprecipitation experiments confirmed that METTL3 knockdown significantly increased the expression of m<sup>6</sup>A-modified pri-miR34a, suggesting that formation of mature miRNAs was associated with DGCR8-dependent pri-miRNA processing. Immunoprecipitation of DGCR8 demonstrated decreased levels of pri-miR34a bound to DGCR8 in METTL3-deficient VSMCs compared to control VSMCs. These results demonstrated that METTL3 promoted AAA formation by targeting miR34a through m<sup>6</sup>A/DGCR8-dependent pri-miRNA processing, indicating that the maturity and content of RNA determines its biological function in AAA formation. Our results might indicate that compared with control of RNA content alone, dual manipulation of both RNA content and maturity may be a better intervention strategy. Although radical changes in RNA content through gene knockout can maximally inhibit the biological functions of an RNA during disease progression, complete knockout of certain genes, which is unlikely to be suitable for future clinical translation, often causes side effects due to compensatory overexpression of other genes.

We further demonstrated that miR34a promoted AAA formation by reducing the expression of SIRT1. Our results show that miR34a promotes AAA formation by exacerbating aortic inflammation and VSMC senescence, as supported by our findings that miR34a overexpression upregulated aortic expression of MMP2 and MCP-1 and increased macrophage infiltration, which are well-known factors affecting AAA development, and that miR34a repression exerted the opposite effects. Consistently, other studies have reported that miR34a induces the senescence of VSMCs and the expression of age-associated proinflammatory secretory factors, which are the main predisposing factors for AAA. Mechanistically, a luciferase activity assay verified that the target gene of miR34a was SIRT1, which has been reported to reduce AAA formation by inhibiting p21-dependent vascular cell senescence, proinflammatory molecule secretion, and vascular inflammation.<sup>5</sup> Accordingly, the expression of SIRT1 was increased in miR34a-deficient mice and METTL3-deficient mice compared to control mice. More importantly, we verified that miR34a or SIRT1 is indispensable in the association of METTL3 overexpression with AAA formation through rescue experiments. We found that miR34a knockdown or SIRT1 overexpression attenuated METTL3 overexpression-exacerbated AAA formation, as well as related vascular pathophysiological changes, namely, elevations in the levels of aortic MMP-2 and proinflammatory molecules. Taken together, our findings reveal that the METTL3/miR-34a/SIRT1 pathway plays a critical role in AAA formation.

Although conditional gene knockout mice are perfect animal models when investigating disease molecular mechanisms, we chose to use AAV9-mediated METTL3 intervention in adult arteries. Our previous study and other studies have demonstrated that adult arteries,<sup>30</sup> especially arterial SMCs, are amenable to transfection with AAV9. Second, our study concentrated on the METTL3/miR34a pathway in AAA. Nonetheless, as METTL3 has theoretical importance in regulating mRNAs and other ncRNAs containing m<sup>6</sup>A tags, whether there are other potential downstream targets of METTL3 should be

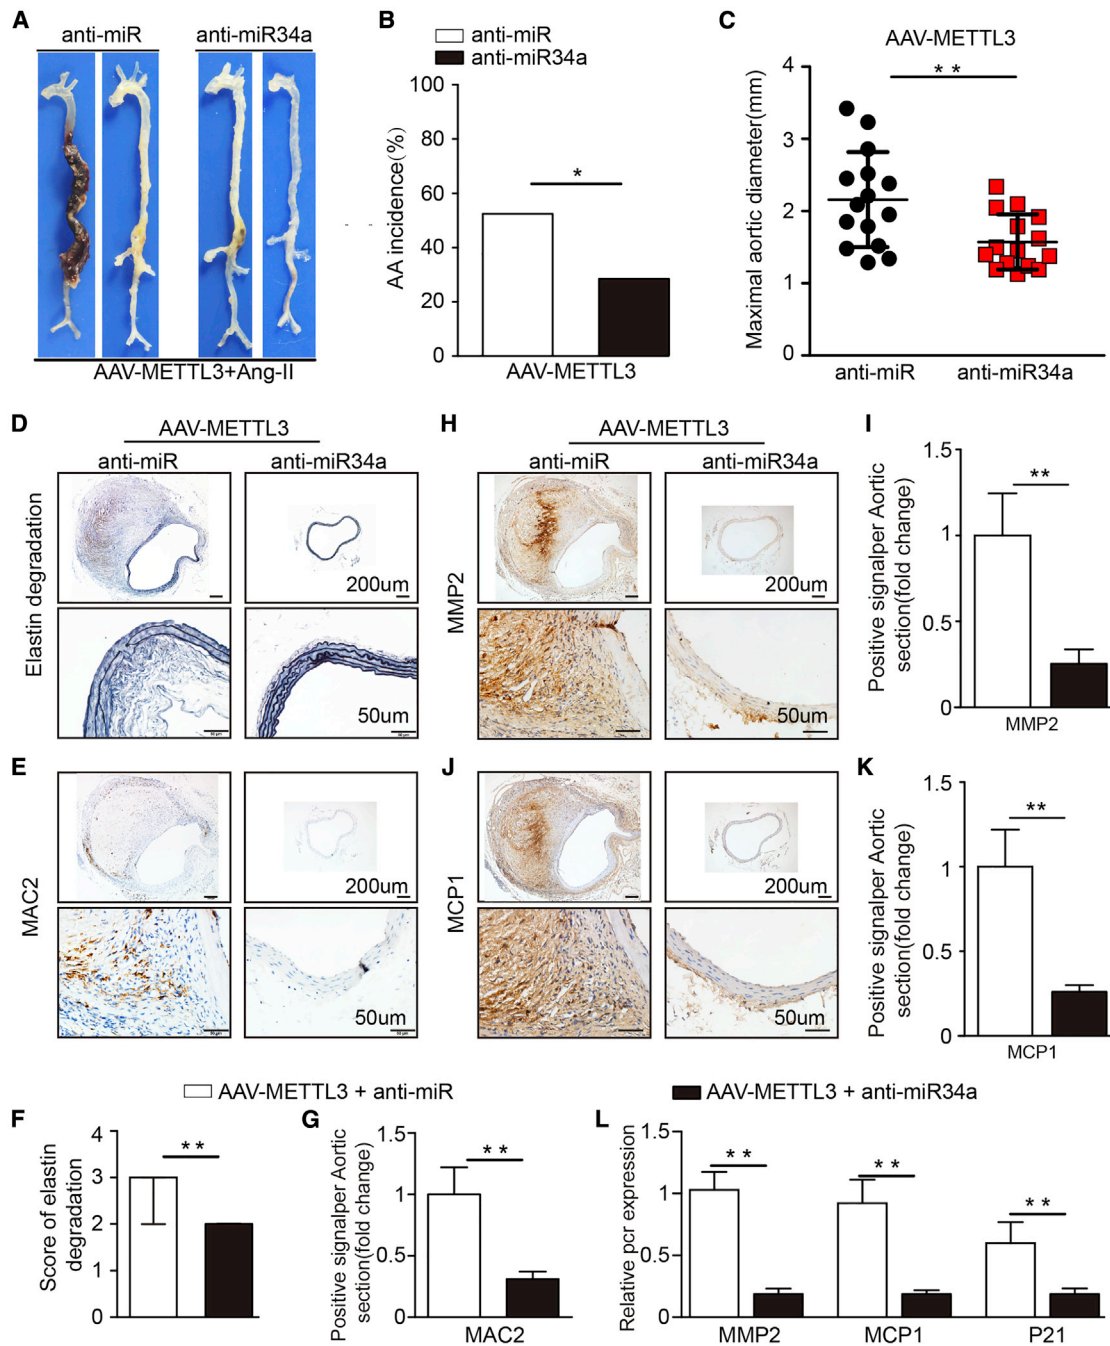

**Figure 8. METTL3 Overexpression Promotes AAA via miR34a/SIRT1**

(A) Representative photographs of the macroscopic features of AAAs in AAV-METTL3 transfected Ang II-infused C57BL/6J mice in the AAV-anti-NC group or the AAV-anti-miR34a group. (B) Statistical analysis of AAA incidence in AAV-METTL3 transfected Ang II-infused C57BL/6J mice. (C) Maximal aortic diameters in the AAV-METTL3-transfected Ang II-infused C57BL/6J mice in the two groups. (D and F) Representative elastin staining (D) and elastin degradation scores (F) in suprarenal aortas from AAV-METTL3 transfected Ang II-infused C57BL/6J mice. The magnified photographs were taken at the position where the most severe elastin degradation occurred (scale bars, 200 and 50  $\mu$ m; magnified photographs). The data are presented as the medians and quartiles. \*\* $p < 0.01$ . (E and G) Representative immunostaining for MAC2 (E) (scale bars, 200 and 50  $\mu$ m) and the corresponding densitometric analysis (G) ( $n = 3$ ). (H–K) Representative immunostaining and densitometric analysis for MMP2 (H and I) and MCP1 (J and K) (scale bars, 200 and 50  $\mu$ m;  $n = 3$ ). (L) Relative mRNA expression of MMP2, MCP1, and P21 in AAV-METTL3 transfected Ang II-infused C57BL/6J mouse aortas ( $n = 3$ ). The data are presented as the mean  $\pm$  SD. \* $p < 0.05$ , \*\* $p < 0.01$ .

explored. Although there may be other downstream targets of METTL3, we demonstrated that miR34a is indispensable in the association of METTL3 overexpression with AAA formation through rescue experiments.

In summary, our work revealed that METTL3/m<sup>6</sup>A participates in AAA formation by promoting the expression of mature miR34a and thus reducing SIRT1 expression. Our study highlights the functional importance of pri-miRNA maturation mediated by METTL3 in AAA progression. Our findings suggest the potential of METTL3 as a novel therapeutic target and diagnostic biomarker for AAA.

## MATERIALS AND METHODS

The data that support the findings of this study are available from the corresponding author on reasonable request.

### Human Aortic Samples

All protocols using human aortic samples were approved by the Research Ethics Committees of Zhongshan People's Hospital, Sun Yat-sen Hospital, and Guangzhou General Hospital of Guangzhou Military Region. AAA samples were obtained from patients undergoing open surgical repair according to the protocols. Control samples were trimmed from adjacent nonaneurysmal aortic segments from the same patients. All human aortic samples were analyzed by western blotting and immunohistochemistry (IHC). All of the human procedures conformed to the principles outlined in the Declaration of Helsinki (clinical information on the patients is available in [Table S1](#)).

### Experimental Animals

The Institutional Animal Care and Use Committee at the Southern Medical University approved all animal procedures. The protocols followed the National Institutes of Health (NIH) Guidelines for the Care and Use of Laboratory Animals. Only male mice were used in this study considering the low incidence of experimental AAA in female mice. Male C57BL/6J mice and male apolipoprotein E-deficient (*ApoE*<sup>-/-</sup>) mice on a C57BL/6J background were purchased from the Laboratory Animal Center of Southern Medical University. All mice were housed under pathogen-free conditions with water and a normal chow diet at a temperature of 22°C and a humidity of 60%–65% under a 12-h dark/light cycle (lights on at 08:00).

### Ang II-Induced AAA Model

Ang II-induced AAA model was performed as previously described.<sup>31</sup> Male wild-type mice aged 10 to 12 weeks and male *ApoE*<sup>-/-</sup> mice aged 12 to 16 weeks were used. Ang II (A9525, Sigma, St. Louis, MO, USA) or normal saline was administered subcutaneously via an implanted osmotic minipump (ALZET, Model 2004, DURECT Corporation, Cupertino, CA, USA) at a rate of 1 µg/kg/min for 28 days. Each minipump was inserted subcutaneously into an anesthetized mouse via a small incision in the dorsum of the neck.

### CaCl<sub>2</sub>-Induced AAA Model

CaCl<sub>2</sub>-induced AAA model was performed as previously described.<sup>32</sup> Male C57BL/6J mice were anesthetized with an intraperitoneal injection

of pentobarbital (40 mg/kg). The abdominal aorta between the renal arteries and the bifurcation of the iliac arteries was disassociated from the surrounding structures. Video microscopy was used to assay the diameter of the aorta in triplicate. After the measurements were taken, a small piece of gauze dipped in 0.5 mol/L CaCl<sub>2</sub> was spread perivascularly onto the aortic passage for 15 min. Control mice received substitute treatment with NaCl (0.9%)-soaked gauze for 15 min. Then, the aorta was rinsed with 0.9% sterile saline, and the incision was sutured. After 3 or 6 weeks, all the animals were sacrificed, and the aortas were harvested for further analysis.

### Aneurysm Quantification

To confirm the existence of AAA, we euthanized mice and cut them open ventrally. A volume of 10 mL of phosphate-buffered saline (PBS) was injected into the left cardiac ventricle and exited through the severed right atrium. Under a dissecting microscope, the periaortic tissue was scraped, and the aorta was photographed. The suprarenal aorta was identified as the passage below the last pair of intercostal arteries and above the right renal branch. To quantify AAA size, we assessed the maximum outer width of the abdominal aorta with Image-Pro Plus (IPP) software (Media Cybernetics, USA). To quantify aneurysm severity, we adopted the accepted human aneurysm definition, which required a more than 50% increase in the outer aortic diameter of treated mice compared with control mice. If mice died before being euthanized, necropsies were performed to confirm whether there were aortic ruptures. Aortic rupture was defined as the existence of blood clots in either the thoracic cavity or the retroperitoneal cavity. Prematurely deceased animals were used only for analysis of mortality and rupture rates and were excluded from the other analyses. The diameter of the abdominal aorta was measured as previously described. Judgment of AAAs was performed by an independent investigator blinded to the experimental processes. A second independent investigator matched the diameters to the different mouse treatments.

### Ultrasonography for AAA

Upon completion of Ang II infusion, the surviving mice were anesthetized intraperitoneally with pentobarbital (40 mg/kg), and the aortas were evaluated by two-dimensional color-coded ultrasound imaging with a Sequoia ultrasound system with a linear array ultrasound transducer (15 L8-S; mechanical index, 0.17; frequency, 14 MHz; Siemens Medical Systems).

### Histological Analyses

Mice were sacrificed, and whole aortas were perfused with normal saline, fixed with 4% paraformaldehyde at physiological pressure for 5 min and isolated. Then, the aortas were segmented to obtain suprarenal abdominal aortas (for Ang II-induced AAA models; from the ascending aorta to the suprarenal abdominal aortas) or infrarenal abdominal aortas (for CaCl<sub>2</sub>-induced AAA models; to the entrance of both iliac arteries). Aortic samples were harvested, fixed for 24 h, and embedded in paraffin. Cross-sections (5 µm each) at intervals of approximately 500 µm were prepared. At least 10 sections were

analyzed per mouse. Immunostaining or elastin van Gieson staining was performed.

### Cell Culture and Treatment

Mouse aortic VSMCs were purchased from Guangzhou Genesee Biotech. Human aortic VSMCs were purchased from Cellbio Company (Shanghai, China). The VSMCs were maintained in Dulbecco's modified Eagle's medium (DMEM) containing 10% fetal bovine serum, 100 U/mL penicillin, and 100 µg/mL streptomycin and were kept at 37°C in a humidified atmosphere containing 5% CO<sub>2</sub>. Cells at passages 3 to 6 grown to 70%–80% confluence were used.

### RNA Interference, Cell Transfection, and Injection of AAVs

Specific siRNAs against METTL3 and scrambled negative control siRNAs (NCs) were designed by GenePharma (Shanghai, China). The overexpression plasmid pEnter-METTL3 (GenBank: NM\_019721.2) was designed by Vigene Biosciences (Jinan, Shandong, China; the sequences are available in the [Supplemental Information](#)). For *ex vivo* experiments, VSMCs were cultured for 24 h. Meanwhile, 50 nM siRNA, 50 nM NCs, or 4 µg of pEnter-METTL3 was randomly added to 250 µL of Opti-MEM (GIBCO BRL, Paisley, UK); 5 µL of Lipofectamine 3000 (L3000015, Invitrogen, USA) was then added, and the mixture was incubated at room temperature for 0.5 h. Then, the mixture was added to the cells, and the cells were incubated for 6 h before replacement of the medium with the same volume of DMEM and further incubation for 48 h. The cells were then subjected to analyses. For *in vivo* experiments, a METTL3 AAV was constructed and packaged by Vigene Biosciences. Specific siRNAs against METTL3 and the NCs were separately constructed into a vector, and an AAV9 harboring these sequences was generated by Vigene Biosciences (Jinan, China). AAV-SIRT1 virus comes from the research published in our group.<sup>33</sup> Mice were infected with one of the above viruses ( $1 \times 10^{11}$  vg) through tail vein injection. 30 days later, the mice were subjected to Ang II, CaCl<sub>2</sub>, or appropriate control treatments as previously indicated. (Information about sequence of specific siRNAs against METTL3 and miR34a is available in [Table S2](#).)

### Immunohistochemical Analysis

Immunohistochemical analysis was carried out as previously described.<sup>34</sup> Mouse slides were deparaffinized, endogenous peroxidase activity was blocked with 3% (vol/vol) hydrogen peroxide, and nonspecific binding sites were blocked by preincubation with 10% bovine serum in PBS. The slides were then incubated at 4°C overnight with primary antibodies (in 1% bovine serum albumin [BSA]) and a biotinylated secondary antibody (in 1% BSA) before being incubated with a horseradish peroxidase (HRP)-labeled streptavidin solution. Next, the slides were dyed with diaminobenzidine and counterstained with hematoxylin. The primary antibodies were METTL3, monocyte chemoattractant protein 1 (MCP1)/CCL2, smooth muscle 22 α (SM22α), α-smooth muscle actin (SMA), matrix metalloproteinase 2 (MMP2), galectin 3 (MAC2), and rabbit immunoglobulin G (IgG). For negative controls from Ang II-treated male *ApoE*<sup>-/-</sup> mice, the primary antibody was omitted, and the slides were incu-

bated with secondary antibody only. All negative control experiments showed nonsignificant staining. (Information about the antibodies is available in [Table S3](#).)

### Immunofluorescent Staining

Immunofluorescent staining was carried out as previously described.<sup>4</sup> Mouse suprarenal abdominal aortas were subjected to immunofluorescent staining. Frozen slides of 5 µm sections were fixed with acetone, blocked with 1% bovine serum in PBS for 1 h, and incubated at 4°C overnight with diluted primary antibodies against METTL3 (diluted in AAPR67-100, PanEra). Then, the slides were incubated with Alexa Fluor-labeled secondary antibodies at 37°C for 45 min in the dark (at maximum excitation wavelengths of 488 nm [green] and 568 nm [red]). The slides were then rinsed with PBS, and images were obtained with a fluorescence inverted microscope (IX83, Olympus, USA). (Information about the antibodies is available in [Table S4](#).)

### Elastin Staining and Degradation

Suprarenal aortic samples were embedded in paraffin, cut, and then measured via Victoria blue van Gieson (VVG) staining with a commercial kit (GenMed, Shanghai). Fields viewed under 40× magnification were used to evaluate elastin degradation. Elastin preservation was graded according to a previously established standard: grade 1 indicated no elastin degradation and a well-organized elastin lamina; grade 2 indicated elastin degradation with interruptions or breaks in the lamina; grade 3 indicated elastin degradation with multiple interruptions or breaks in the lamina; and grade 4 indicated severe elastin fragmentation or loss or aortic rupture.

### Western Blot Analysis

Western blots were performed as described previously.<sup>35</sup> Aortic protein concentrations were determined using western blot analysis with the Bradford method. Samples containing identical amounts of protein were denatured, subjected to 12% sodium dodecyl sulfate-polyacrylamide gel electrophoresis (SDS-PAGE) using a 10% running gel, dissociated with 10% SDS-PAGE, and probed with primary antibodies for METTL3, monocyte chemotactic protein 1 (MCP1), MMP9, SIRT1, GAPDH (glyceraldehyde-3-phosphate dehydrogenase), or β-actin (all diluted in AAPR67-100 [PanEra]) at 4°C overnight. Next, the membranes were washed and incubated with an HRP-conjugated anti-rabbit secondary antibody (1:5,000 dilution, DAKO) for 2 h. GAPDH or β-Actin was used as a negative control. Bands were detected using enhanced chemiluminescence (ECL Advance; #RPN2235, GE Healthcare Life Sciences). The signals were recorded using a ChemiDoc imaging system (Bio-Rad Laboratories) and analyzed with ImageJ analysis software (NIH, Bethesda, MD, USA). All experiments were performed in triplicate. (The antibodies are listed in the [Table S5](#).)

### MAC2, MCP1, and MMP2 Quantification

MAC2, MCP1, and MMP2 quantification was performed with IPP software based on the integrated optical density (IOD) value, the chroma sum and the positive staining area (brown). The mean IOD

was defined as the IOD value divided by the area of the samples. Three to four low-power sections and 9–12 high-power sections were obtained for each sample; the latter were used for calculation of the mean IOD value.

#### Quantitative Real-Time PCR

Total RNA was isolated from *ex vivo* VSMCs or mouse aortic wall tissues. Homogenates were resuspended in TRIzol reagent (Invitrogen), and the total RNA was purified. Then, the total RNA was converted into cDNA by reverse transcriptase (Takara Biotechnology, Dalian, China) using primer sequences for the molecules of interest. Quantitative real-time PCR was performed with a SYBR Green RT-PCR Kit (Takara Biotechnology, Dalian, China) and a LightCycler 480 II system (Roche Diagnostics, Basel, Switzerland). Quantification of the relative mRNA levels of the target genes was performed using the  $2^{-\Delta\Delta C_t}$  method, with  $\beta$ -actin as a normalization reference. The mRNA levels are expressed as the fold increases over control values after normalization. The primers were synthesized by Saicheng Biotech (Guangzhou, China). (The primers for quantitative real-time PCR are listed in Table S6.)

#### In Situ Zymography

The detection of MMP activity was carried out as previously reported. Mouse suprarenal abdominal aortas were subjected to *in situ* detection of gelatinolytic activity. First, reagent A and reagent B were mixed according to the kit instructions (GMS80062, Genmed Scientifics, USA). Then, in a dark environment, serial 10-mm fresh-frozen sections were incubated at 4°C with the mixture of reagent A and reagent B. When the mixture solidified, the frozen sections were transferred to a 37°C dark chamber and incubated for 1 h. Finally, the sections were photographed under a fluorescence inverted microscope (IX83, Olympus, Japan). Proteolytic activity was detected as bright green fluorescence (530 nm).

#### RNA m<sup>6</sup>A Immunoblotting

RNA m<sup>6</sup>A immunoblotting was carried out as previously reported.<sup>36</sup> Total RNA was isolated as described above and then treated with deoxyribonuclease I (AMPD1-1KT, Sigma). A GenElute mRNA Miniprep Kit (MRN70, Sigma-Aldrich) and a RiboMinus Transcriptome Isolation Kit (K155002, human/mouse, Thermo Fisher Scientific) were used for m<sup>6</sup>A immunoblotting analysis. Poly(A)<sup>+</sup> RNA (500 ng) and ribosomal RNA (rRNA)-free poly(A)<sup>+</sup> RNA (200 ng) were mixed 1:1 with glyoxal loading dye (Ambion). After denaturation at 65°C for 15 min, the samples were run on a 1% agarose gel for 1 h at 70 V and transferred to nylon membranes (GE Healthcare Life Biosciences) for approximately 2 to 3 h using a NorthernMax Kit (Ambion) according to the manufacturer's protocols. The membranes with RNA were ultraviolet-crosslinked and blocked in blocking buffer (5% nonfat dry milk in 0.1% PBST; 0.1% Tween-20 in 1 × PBS, pH 7.4) for 1 h at room temperature. Next, the membranes were incubated with rabbit anti-m<sup>6</sup>A antibody (202 003; Synaptic Systems) diluted 1:1,000 in 0.1% PBST at 4°C overnight. Following washing with 0.1% PBST, HRP-conjugated donkey anti-rabbit IgG (Cell Signaling Technology) diluted 1:2,500 in blocking buffer was added

to the membranes, which were incubated at room temperature for 1 h. Then, the membranes were again washed adequately with 0.1% PBST and detected using a 3,3'-diaminobenzidine peroxidase substrate kit (Yeasen Biotechnology, Shanghai, China). For visualization of the total RNA, equal amounts of RNA were run on agarose gels and then stained using ethidium bromide.

#### RNA m<sup>6</sup>A Quantification

RNA m<sup>6</sup>A quantification was carried out as previously reported.<sup>36</sup> Total RNA was isolated using TRIzol (Omegra, USA) as described above and treated with deoxyribonuclease I (AMPD1-1KT, Sigma). The RNA was quantified using a NanoDrop spectrophotometer. The m<sup>6</sup>A content of the total RNA was detected using an m<sup>6</sup>A RNA methylation quantification kit (ab185912; Abcam). Briefly, 200 ng of RNA was coated onto the wells of an assay plate. Then, a capture antibody solution and a detection antibody solution were added to the assay wells at suitable dilutions following the manufacturer's instructions. The m<sup>6</sup>A levels were quantified colorimetrically by reading the absorbance of each well at a wavelength of 450 nm and calculating the concentrations based on a standard curve.

#### RNA m<sup>6</sup>A Dot Blot Assays

RNA m<sup>6</sup>A dot blot assays were carried out as previously reported.<sup>37</sup> Dot blots were performed in a manner generally consistent with the m<sup>6</sup>A immunoblotting analysis described above. Briefly, 400 ng of poly(A)<sup>+</sup> RNA was double-diluted and spotted on the surface of a nylon membrane (11209299001, Sigma-Aldrich). Then, the membranes with RNA were ultraviolet-crosslinked and blocked with blocking buffer. After incubation with m<sup>6</sup>A antibody and HRP-conjugated anti-rabbit IgG (ab6802; Abcam), the membranes were detected using a 3,3'-diaminobenzidine peroxidase substrate kit as described above. For visualization of the RNA, 400 ng of the same poly(A)<sup>+</sup> RNA was spotted onto a membrane, which was then stained with 0.02% methylene blue in 0.3 M sodium acetate (pH 5.2) for 2 h and washed with ribonuclease-free water for 5 h.

#### RNA Immunoprecipitation

RNA m<sup>6</sup>A RNA immunoprecipitation was carried out as previously reported.<sup>36</sup> Human VSMCs overexpressing METTL3 and control cells were UV-irradiated at 254 nm/cm<sup>2</sup> and 400 mJ/cm<sup>2</sup> (Stratagene Stratalinker) and lysed with radioimmunoprecipitation (RIP) lysis buffer (17-700; Magna RIP Kit; Millipore, MA) at 4°C through disruptive sonication. Immunoprecipitation of endogenous DGCR8 was performed using an anti-DGCR8 antibody (ab191875, Abcam) overnight at 4°C. After washing, the immunoprecipitated protein-RNA complex was analyzed by western blotting and treated with proteinase K. The RNA was extracted with phenol:chloroform:isoamyl alcohol and subjected to quantitative real-time PCR using primers for primary microRNAs (pri-miRNAs) with normalization to the input. For m<sup>6</sup>A RNA binding experiments, similar to the methods for DGCR8 RNA immunoprecipitation, RNA from human VSMCs overexpressing METTL3 and control cells was isolated and treated with deoxyribonuclease I (AMPD1-1KT, Sigma). The RNA was fragmented by sonication for 10 s on an ice-water mixture.



Immunoprecipitation was performed by incubating the DNA-free fragmented RNA using a rabbit anti-m<sup>6</sup>A antibody (202 003; Synaptic Systems) that had previously been bound to magnetic Dynabeads (Life Technologies) in RIP Immunoprecipitation Buffer (17-700; Magna RIP Kit; Millipore, MA, USA). The beads were then treated with proteinase K (20 mg/mL) for 1.5 h at 42°C. The RNA was extracted with phenol:chloroform:isoamyl alcohol and subjected to cDNA synthesis and quantitative real-time PCR using primers for pri-miRNAs with normalization to the input. (Information about the RIP-specific primer pairs for the miR34AHG gene is available in the online Tables S7 and S8.)

### Statistical Analysis

The data are expressed as the mean ± standard deviation (SD) or medians with interquartile range. Statistical analysis was performed with SPSS version 20.0 (SPSS, Chicago, IL, USA). A normal distribution test was first performed. If variance equality among the different groups was confirmed, Student's t test was used to analyze differences between 2 independent groups, while one or two-way analysis of variance (ANOVA) followed by Dunnett's post hoc test was used to analyze differences among 3 or more groups. When data failed to pass the tests for both normality and equal variance, nonparametric Mann-Whitney U tests were performed for 2 independent groups. Fisher's exact test was performed for the aneurysm incidence analysis. Differences were considered statistically significant at  $p < 0.05$ .

### SUPPLEMENTAL INFORMATION

Supplemental Information can be found online at <https://doi.org/10.1016/j.omtn.2020.06.005>.

### AUTHOR CONTRIBUTIONS

The contribution of each author is as follows: L.Z. wrote the paper, performed the experiments, and analyzed the data, X.H., H.S., Y.S., G.C., and X.S. performed the experiments and analyzed the data, J.S. and X.C. analyzed the data and wrote the paper, W.L. and Y.L. designed the research, and J.B. designed the research and wrote the paper. All authors read and approved the final version of the manuscript.

### CONFLICTS OF INTEREST

The authors declare no competing interests.

### ACKNOWLEDGMENTS

This work was supported by grants to J.B. from the National Natural Science Foundation of China (nos. 81771857 and 81571698) and Guangzhou Regenerative Medicine and Health Laboratory of Guangdong (2018GZR110105009).

### REFERENCES

- Li, X., Zhao, G., Zhang, J., Duan, Z., and Xin, S. (2013). Prevalence and trends of the abdominal aortic aneurysms epidemic in general population—a meta-analysis. *PLoS ONE* 8, e81260.
- Golledge, J., and Norman, P.E. (2011). Current status of medical management for abdominal aortic aneurysm. *Atherosclerosis* 217, 57–63.
- Li, Y., and Maegdefessel, L. (2017). Non-coding rna contribution to thoracic and abdominal aortic aneurysm disease development and progression. *Front. Physiol.* 8, 429.
- Zhong, L., He, X., Si, X., Wang, H., Li, B., Hu, Y., Li, M., Chen, X., Liao, W., Liao, Y., and Bin, J. (2019). Sm22alpha (smooth muscle 22alpha) prevents aortic aneurysm formation by inhibiting smooth muscle cell phenotypic switching through suppressing reactive oxygen species/nf-kappab (nuclear factor-kappab). *Arterioscler. Thromb. Vasc. Biol.* 39, e10–e25.
- Chen, H.Z., Wang, F., Gao, P., Pei, J.F., Liu, Y., Xu, T.T., Tang, X., Fu, W.Y., Lu, J., Yan, Y.F., et al. (2016). Age-associated sirtuin 1 reduction in vascular smooth muscle links vascular senescence and inflammation to abdominal aortic aneurysm. *Circ. Res.* 119, 1076–1088.
- Li, D.Y., Busch, A., Jin, H., Chernogubova, E., Pelisek, J., Karlsson, J., Sennblad, B., Liu, S., Lao, S., Hofmann, P., et al. (2018). H19 induces abdominal aortic aneurysm development and progression. *Circulation* 138, 1551–1568.
- van der Veer, E.P., de Bruin, R.G., Kraaijeveld, A.O., de Vries, M.R., Bot, I., Pera, T., Segers, F.M., Trompet, S., van Gils, J.M., Roeten, M.K., et al. (2013). Quaking, an RNA-binding protein, is a critical regulator of vascular smooth muscle cell phenotype. *Circ. Res.* 113, 1065–1075.
- Tang, Z.Z., Zheng, S., Nikolic, J., and Black, D.L. (2009). Developmental control of CaV1.2 L-type calcium channel splicing by Fox proteins. *Mol. Cell. Biol.* 29, 4757–4765.
- Tiwari, S., Zhang, Y., Heller, J., Abernethy, D.R., and Soldatov, N.M. (2006). Atherosclerosis-related molecular alteration of the human CaV1.2 calcium channel alpha1C subunit. *Proc. Natl. Acad. Sci. USA* 103, 17024–17029.
- Tajada, S., Ciudad, P., Colinas, O., Santana, L.F., López-López, J.R., and Pérez-García, M.T. (2013). Down-regulation of CaV1.2 channels during hypertension: how fewer CaV1.2 channels allow more Ca(2+) into hypertensive arterial smooth muscle. *J. Physiol.* 591, 6175–6191.
- Bannister, J.P., Bulley, S., Narayanan, D., Thomas-Gatewood, C., Luzny, P., Pachua, J., and Jaggar, J.H. (2012). Transcriptional upregulation of alpha2delta-1 elevates arterial smooth muscle cell voltage-dependent ca2+ channel surface expression and cerebrovascular constriction in genetic hypertension. *Hypertension* 60, 1006–1015.
- Wang, C.X., Cui, G.S., Liu, X., Xu, K., Wang, M., Zhang, X.X., Jiang, L.Y., Li, A., Yang, Y., Lai, W.Y., et al. (2018). METTL3-mediated m6A modification is required for cerebellar development. *PLoS Biol.* 16, e2004880.
- Alarcón, C.R., Lee, H., Goodarzi, H., Halberg, N., and Tavazoie, S.F. (2015). N6-methyladenosine marks primary microRNAs for processing. *Nature* 519, 482–485.
- Wang, X., Zhao, B.S., Roundtree, I.A., Lu, Z., Han, D., Ma, H., Weng, X., Chen, K., Shi, H., and He, C. (2015). (6)-methyladenosine modulates messenger rna translation efficiency. *Cell* 161, 1388–1399.
- Liu, J., Yue, Y., Han, D., Wang, X., Fu, Y., Zhang, L., Jia, G., Yu, M., Lu, Z., Deng, X., et al. (2014). A METTL3-METTL14 complex mediates mammalian nuclear RNA N6-adenosine methylation. *Nat. Chem. Biol.* 10, 93–95.
- Dorn, L.E., Lasman, L., Chen, J., Xu, X., Hund, T.J., Medvedovic, M., Hanna, J.H., van Berlo, J.H., and Accornero, F. (2019). The n(6)-methyladenosine mrna methylase mettl3 controls cardiac homeostasis and hypertrophy. *Circulation* 139, 533–545.
- Mathiyalagan, P., Adamiak, M., Mayourian, J., Sassi, Y., Liang, Y., Agarwal, N., Jha, D., Zhang, S., Kohlbrenner, E., Chepurko, E., et al. (2019). Fto-dependent n(6)-methyladenosine regulates cardiac function during remodeling and repair. *Circulation* 139, 518–532.
- Cheng, M., Sheng, L., Gao, Q., Xiong, Q., Zhang, H., Wu, M., Liang, Y., Zhu, F., Zhang, Y., Zhang, X., Yuan, Q., and Li, Y. (2019). The m(6)a methyltransferase mettl3 promotes bladder cancer progression via aff4/nf-kappab/myc signaling network. *Oncogene* 38, 3667–3680.
- Feng, Z., Li, Q., Meng, R., Yi, B., and Xu, Q. (2018). Mettl3 regulates alternative splicing of myd88 upon the lipopolysaccharide-induced inflammatory response in human dental pulp cells. *J. Cell Mol. Med* 22, 2558–2568.
- Joviliano, E.E., Ribeiro, M.S., and Tenorio, E.J.R. (2017). Micrnas and current concepts on the pathogenesis of abdominal aortic aneurysm. *Rev. Bras. Cir. Cardiovasc.* 32, 215–224.

21. Kumar, S., Boon, R.A., Maegdefessel, L., Dimmeler, S., and Jo, H. (2019). Role of non-coding RNAs in the pathogenesis of abdominal aortic aneurysm. *Circ. Res.* *124*, 619–630.
22. Badi, I., Burba, I., Ruggeri, C., Zeni, F., Bertolotti, M., Scopece, A., Pompilio, G., and Raucci, A. (2015). MicroRNA-34a induces vascular smooth muscle cells senescence by sirt1 downregulation and promotes the expression of age-associated pro-inflammatory secretory factors. *J. Gerontol. A Biol. Sci. Med. Sci.* *70*, 1304–1311.
23. Badi, I., Mancinelli, L., Polizzotto, A., Ferri, D., Zeni, F., Burba, I., Milano, G., Brambilla, F., Saccu, C., Bianchi, M.E., et al. (2018). Mir-34a promotes vascular smooth muscle cell calcification by downregulating sirt1 (sirtuin 1) and axl (axl receptor tyrosine kinase). *Arterioscler. Thromb. Vasc. Biol.* *38*, 2079–2090.
24. Guo, Y., Li, P., Gao, L., Zhang, J., Yang, Z., Bledsoe, G., Chang, E., Chao, L., and Chao, J. (2017). Kallistatin reduces vascular senescence and aging by regulating microRNA-34a-SIRT1 pathway. *Aging Cell* *16*, 837–846.
25. Wang, Y., Krishna, S., and Golledge, J. (2013). The calcium chloride-induced rodent model of abdominal aortic aneurysm. *Atherosclerosis* *226*, 29–39.
26. Saraff, K., Babamusta, F., Cassis, L.A., and Daugherty, A. (2003). Aortic dissection precedes formation of aneurysms and atherosclerosis in angiotensin II-infused, apolipoprotein E-deficient mice. *Arterioscler. Thromb. Vasc. Biol.* *23*, 1621–1626.
27. Maegdefessel, L., Azuma, J., Toh, R., Merk, D.R., Deng, A., Chin, J.T., Raaz, U., Schoelmerich, A.M., Raiesdana, A., Leeper, N.J., et al. (2012). Inhibition of microRNA-29b reduces murine abdominal aortic aneurysm development. *J. Clin. Invest.* *122*, 497–506.
28. Di Gregoli, K., Mohamad Anuar, N.N., Bianco, R., White, S.J., Newby, A.C., George, S.J., and Johnson, J.L. (2017). MicroRNA-181b controls atherosclerosis and aneurysms through regulation of timp-3 and elastin. *Circ. Res.* *120*, 49–65.
29. Zhou, Y., Zeng, P., Li, Y.H., Zhang, Z., and Cui, Q. (2016). SRAMP: prediction of mammalian N6-methyladenosine (m6A) sites based on sequence-derived features. *Nucleic Acids Res.* *44*, e91.
30. Bostick, B., Ghosh, A., Yue, Y., Long, C., and Duan, D. (2007). Systemic AAV-9 transduction in mice is influenced by animal age but not by the route of administration. *Gene Ther.* *14*, 1605–1609.
31. Daugherty, A., Manning, M.W., and Cassis, L.A. (2000). Angiotensin II promotes atherosclerotic lesions and aneurysms in apolipoprotein E-deficient mice. *J. Clin. Invest.* *105*, 1605–1612.
32. Longo, G.M., Xiong, W., Greiner, T.C., Zhao, Y., Fiotti, N., and Baxter, B.T. (2002). Matrix metalloproteinases 2 and 9 work in concert to produce aortic aneurysms. *J. Clin. Invest.* *110*, 625–632.
33. Li, X., Sun, Y., Huang, S., Chen, Y., Chen, X., Li, M., Si, X., He, X., Zheng, H., Zhong, L., et al. (2019). Inhibition of AZIN2-sv induces neovascularization and improves prognosis after myocardial infarction by blocking ubiquitin-dependent talin1 degradation and activating the Akt pathway. *EBioMedicine* *39*, 69–82.
34. Jing, Y., Hu, Y., Li, H., Wang, J., Si, X., Zheng, H., Liu, J., Liao, W., Liao, Y., and Bin, J. (2018). Assessment of thrombotic risk in atrial fibrillation with ultrasound molecular imaging of p-selectin. *Thromb. Haemost.* *118*, 388–400.
35. Xie, J., Cui, K., Hao, H., Zhang, Y., Lin, H., Chen, Z., Huang, X., Cao, S., Liao, W., Bin, J., et al. (2016). Acute hyperglycemia suppresses left ventricular diastolic function and inhibits autophagic flux in mice under prohypertrophic stimulation. *Cardiovasc. Diabetol.* *15*, 136.
36. Ma, J.Z., Yang, F., Zhou, C.C., Liu, F., Yuan, J.H., Wang, F., Wang, T.T., Xu, Q.G., Zhou, W.P., and Sun, S.H. (2017). METTL14 suppresses the metastatic potential of hepatocellular carcinoma by modulating N6-methyladenosine-dependent primary MicroRNA processing. *Hepatology* *65*, 529–543.
37. Li, Z., Weng, H., Su, R., Weng, X., Zuo, Z., Li, C., Huang, H., Nachtergaele, S., Dong, L., Hu, C., et al. (2017). Fto plays an oncogenic role in acute myeloid leukemia as a n(6)-methyladenosine RNA demethylase. *Cancer Cell* *31*, 127–141.

OMTN, Volume 21

## **Supplemental Information**

**METTL3 Induces AAA Development and Progression**

**by Modulating N6-Methyladenosine-Dependent**

**Primary miR34a Processing**

**Lintao Zhong, Xiang He, Haoyu Song, Yili Sun, Guojun Chen, Xiaoyun Si, Jie Sun, Xiaoqiang Chen, Wangjun Liao, Yulin Liao, and Jianping Bin**

**METTL3 induces abdominal aortic aneurysm development and progression by modulating N6-methyladenosine-dependent primary miR34a processing**

Lintao Zhong<sup>a,\*</sup>, MD, PhD; Xiang He<sup>a</sup>, MD, PhD; Haoyu Song<sup>a</sup>, MD, PhD; Yili Sun<sup>a</sup>, MD, PhD; Guojun Chen<sup>a</sup>, MD, PhD; Xiaoyun Si<sup>a</sup>, MD, PhD; Jie Sun<sup>a</sup>, MD, PhD; Xiaoqiang Chen<sup>a</sup>, MD; Wangjun Liao<sup>b</sup>, MD, PhD; Yulin Liao<sup>a</sup>, MD, PhD; Jianping Bin<sup>a,\*</sup>, MD, PhD

<sup>a</sup> State Key Laboratory of Department of Cardiology, Organ Failure Research, Nanfang Hospital, Southern Medical University, Guangzhou 510515, China;

<sup>b</sup> Department of Oncology, Nanfang Hospital, Southern Medical University, Guangzhou 510515, China

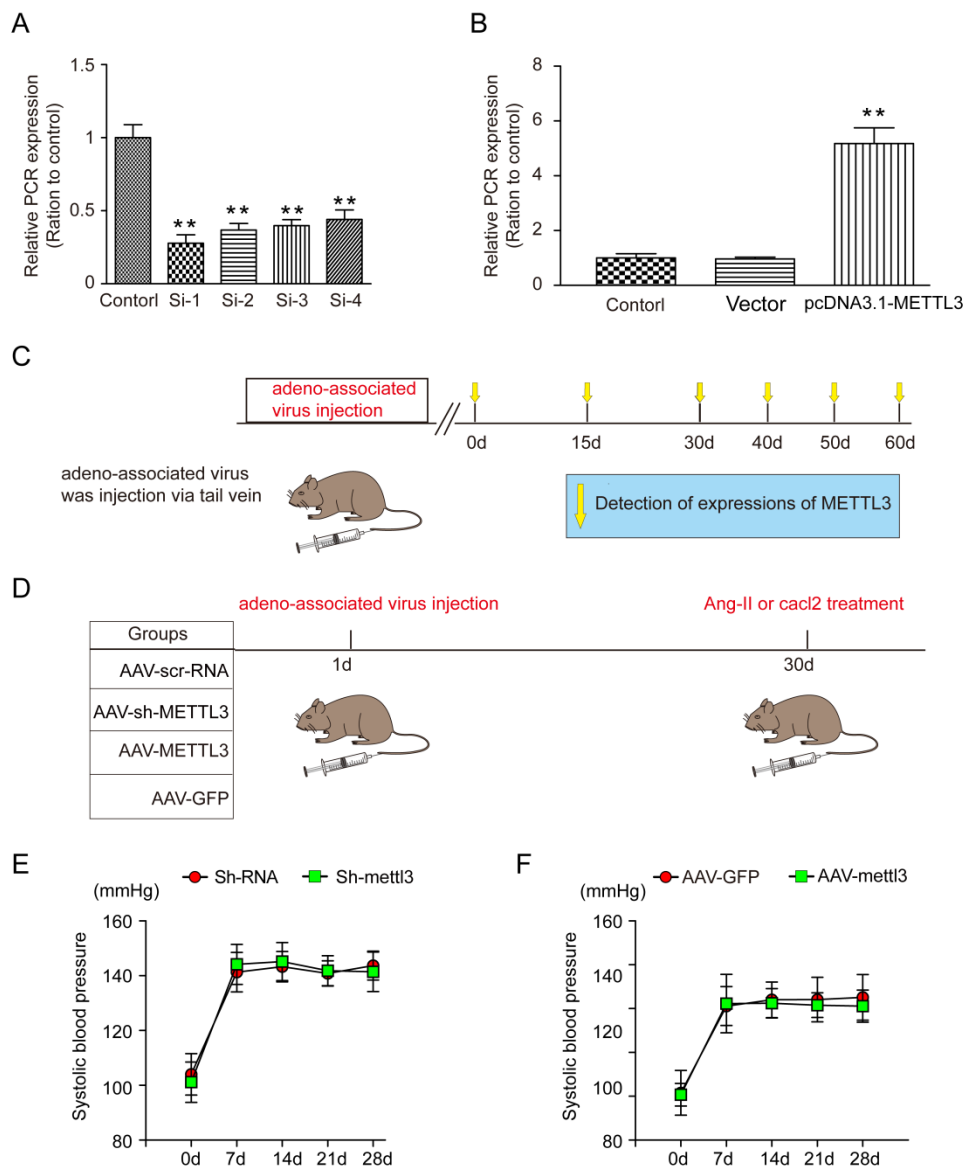

Online Figure 1

**Online Figure 1.** Selection of a potent adeno-associated virus (AAV) carrying METTL3 siRNA and overexpression plasmids and a diagram of the virus-related experimental flow. A, Inhibitory effects of four small interfering RNAs (siRNAs) against METTL3 in VSMCs as assessed by qRT-PCR analysis. B, Overexpression effects of the constructed pcDNA3.1-METTL3 plasmid in VSMCs as assessed by qRT-PCR analysis. C, Protocol for the in vivo AAV-mediated METTL3 knockdown and overexpression experiment. A predetermined number of male mice were injected with Scr-RNA, sh-METTL3, AAV-GFP or AAV-METTL3. Before injection and at 15 days, 30 days, 40 days, 50 days, and 60 days after the initial injection, a predetermined number of mice were sacrificed, and aortic samples were collected to detect aortic METTL3 expression (n=3). D, Thirty days after the initial AAV transfection, mice were treated with Ang II via minipump for four weeks or were

subjected to CaCl<sub>2</sub>-treatment surgery and sacrificed after 3 or six weeks. The data are presented as the mean  $\pm$  SD. \*P<0.05, \*\*P<0.01.

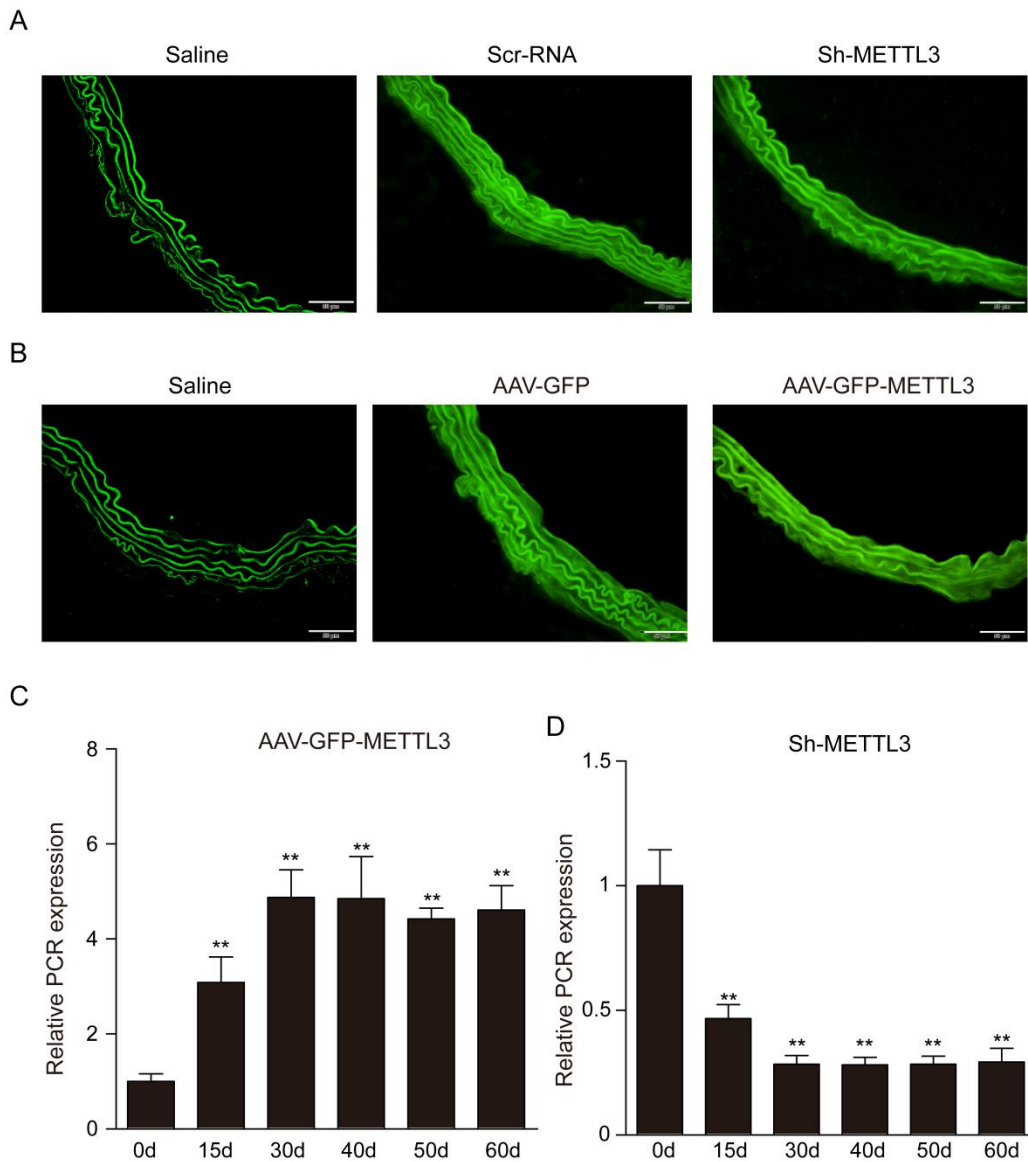

OnlineFigure 2

**Online Figure 2.** Confirmation of the viral infection efficiency in the suprarenal aortas of mice. A and B, Representative immunofluorescent staining of virus-borne green fluorescent protein (GFP) in the aortas of mice from the different virus-mediated groups and the saline group (scale bar, 50  $\mu$ m). C and D, qRT-PCR analysis of the mRNA expression of METTL3 over time after sh-METTL3 or AAV-METTL3 transfection in the suprarenal aortas of mice (n=3). The data are presented as the mean  $\pm$  SD. \*P<0.05.

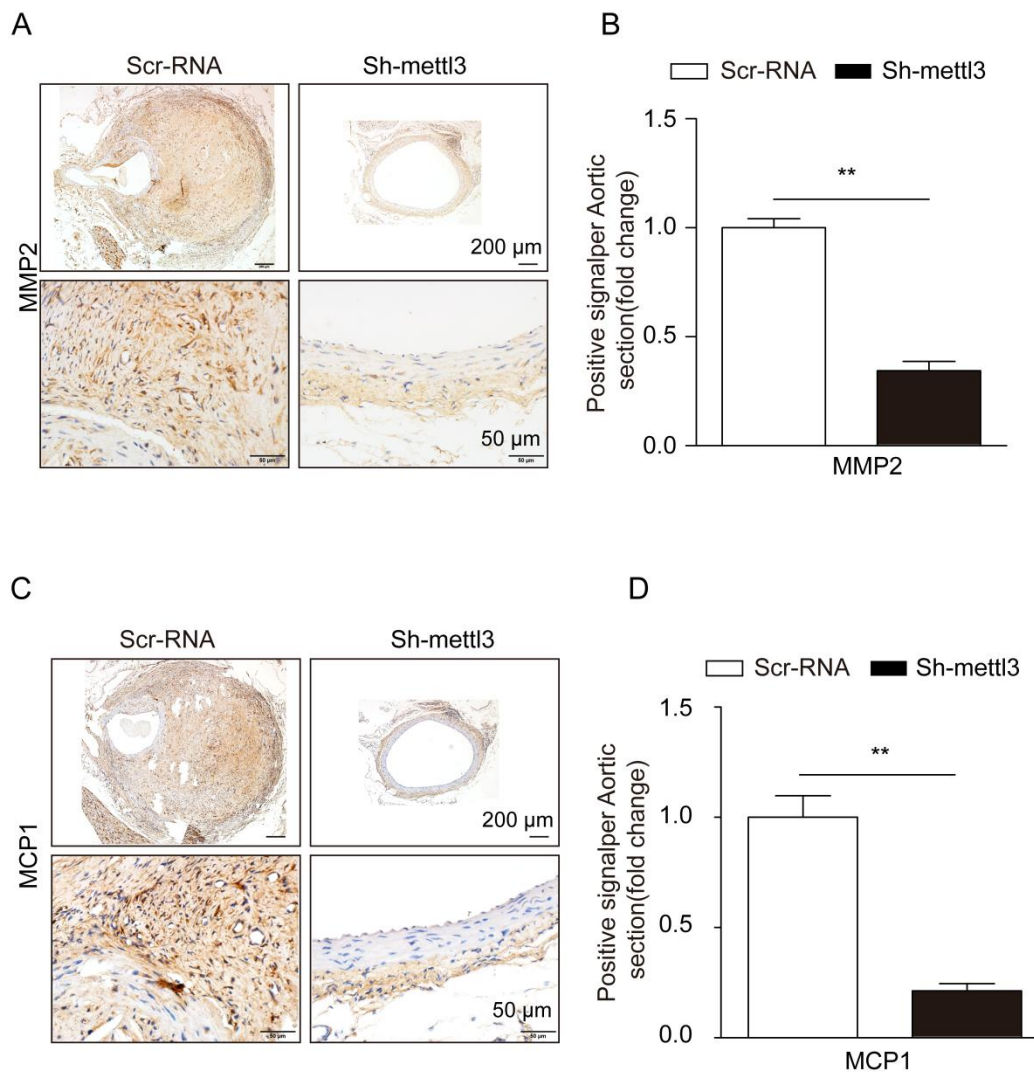

Online Figure 3

**Online Figure 3.** METTL3 knockdown attenuates MMP2 and MCP1 expression in Ang II-infused ApoE<sup>-/-</sup> mice. A to D, Immunohistochemical staining of abdominal aortic MMP2 (A,B) and MCP1 (C,D) in Ang II-infused male ApoE<sup>-/-</sup> mice (n=3; scale bars, 200  $\mu$ m (upper) and 50  $\mu$ m (lower)). The data are presented as the mean  $\pm$  SD. \*P<0.05.

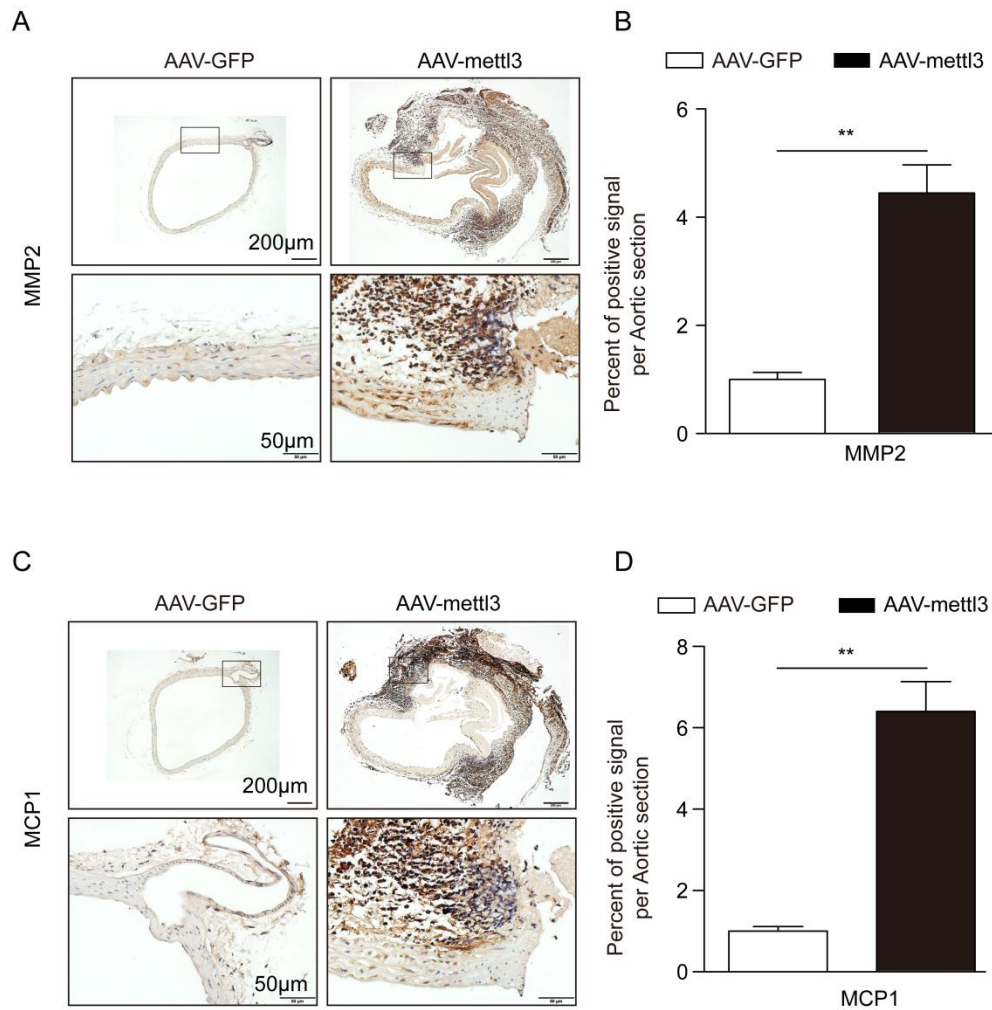

Online Figure 4

**Online Figure 4.** Overexpression of METTL3 increases the expression of MMP2 and MCP1 in Ang II-infused C57BL/6J mice. A to D, Immunohistochemical staining of abdominal aortic MMP2 (A,B) and MCP1 (C,D) in Ang II-infused C57BL/6J mice (n=3; scale bars, 200 µm (upper) and 50 µm (lower)). The data are presented as the mean ±SD. \*P<0.05.



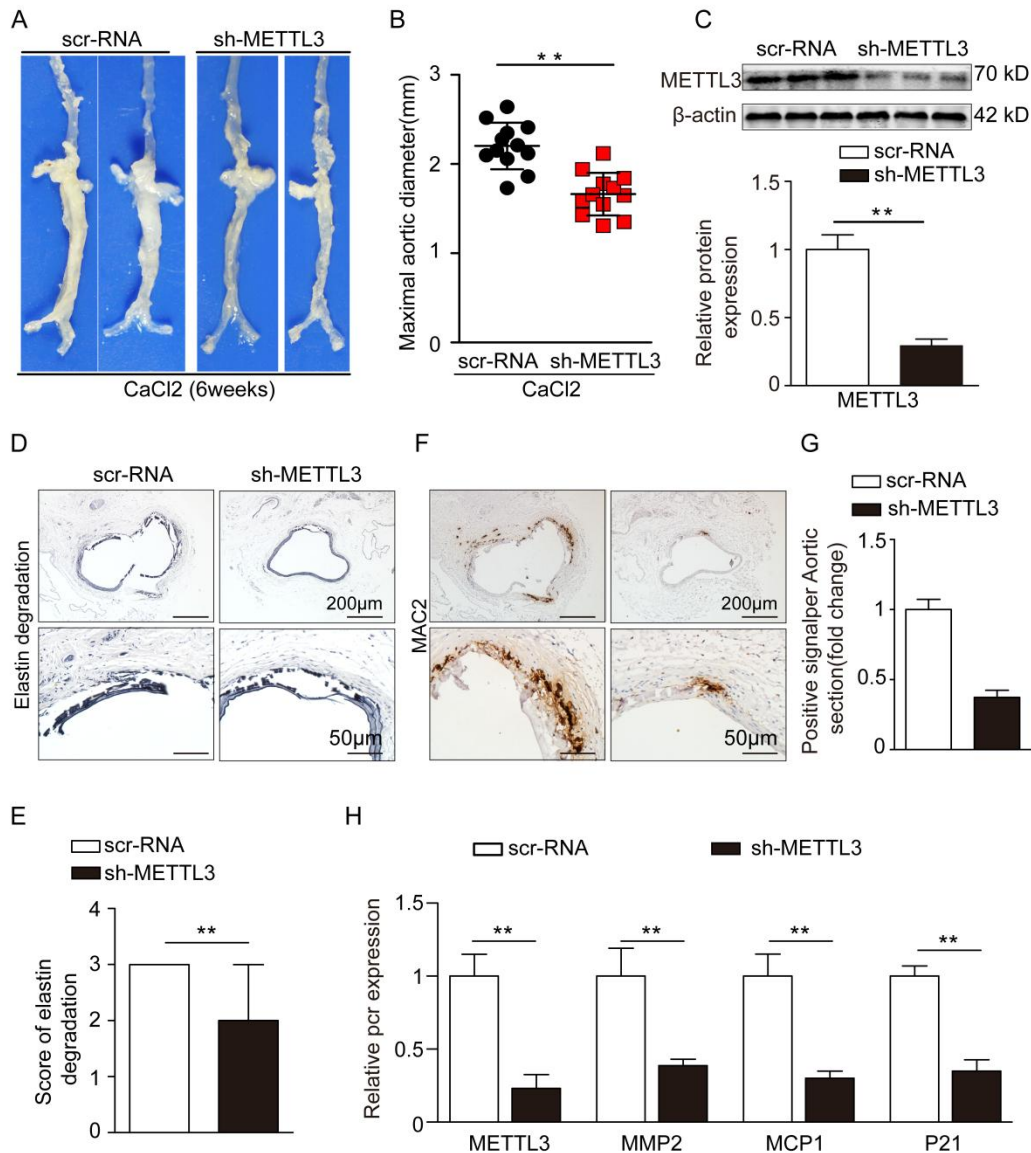

Online Figure 5

**Online Figure 5.** METTL3 suppression inhibits CaCl<sub>2</sub>-induced AAA formation. C57BL/6J mice were injected with Scr-RNA or sh-METTL3, and their infrarenal aortas were then treated with CaCl<sub>2</sub> for 15 min. After six weeks, the mice were sacrificed and used for analysis. A, Representative images showing C57BL/6J mouse infrarenal aortas treated with CaCl<sub>2</sub>. B, Maximal diameters of infrarenal aortas from CaCl<sub>2</sub>-induced C57BL/6J mice. C, Representative western blots and statistical analysis of aortic METTL3 in CaCl<sub>2</sub>-treated C57BL/6J mice. D and E, Representative elastin staining and statistical analysis of elastin degradation scores in the two groups of mice. F and G, Representative immunohistochemical staining (F) and statistical analysis (G) of MAC2 in aortas from the two groups of mice (n=4 per group). G and H, mRNA levels of aortic METTL3, MCP-1, MMP-2 and P21 in CaCl<sub>2</sub>-treated C57BL/6J mice. The data are presented as the mean ± SD. \*P<0.05, \*\*P<0.01.

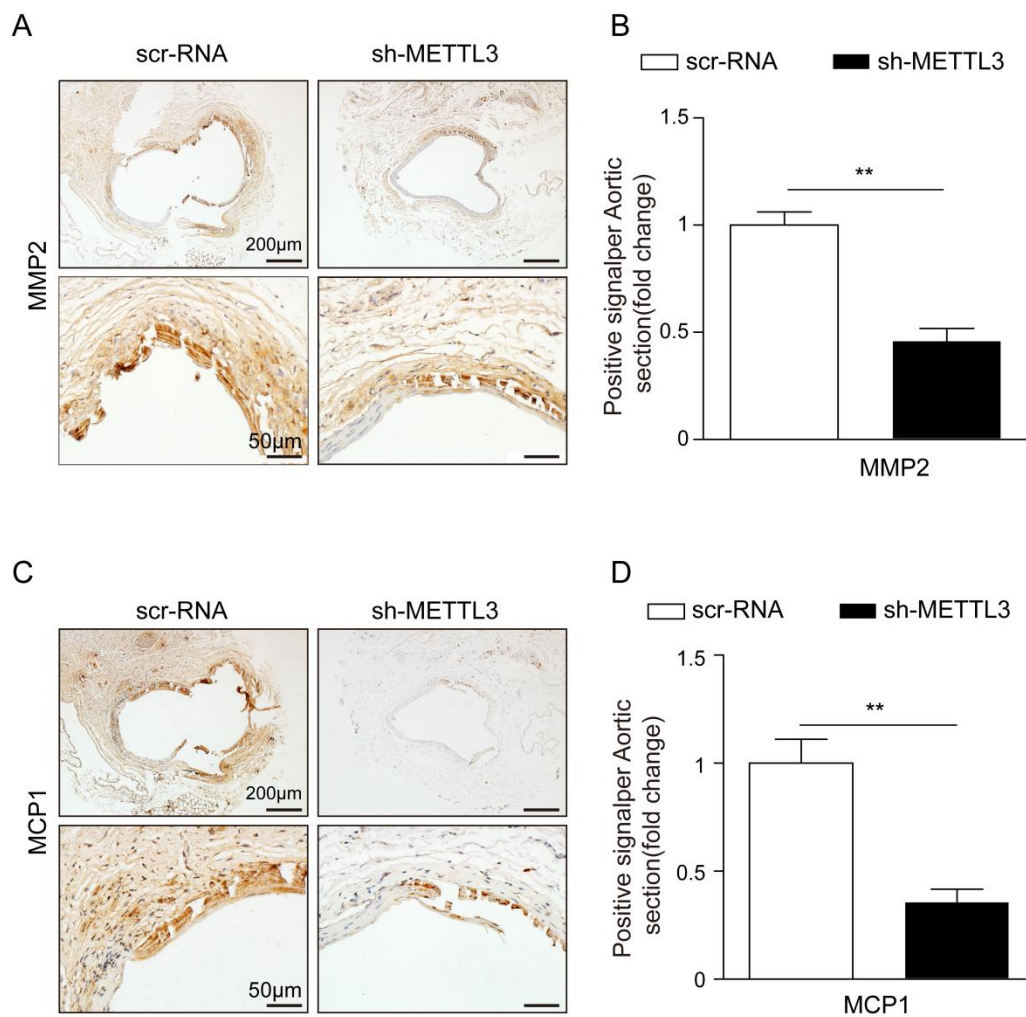

Online Figure 6

**Online Figure 6.** METTL3 suppression inhibits vascular MMP2 and MCP1 expression. A to C, Immunofluorescent staining for MMP2 (A,B) and MCP1 (C,D) (scale bars, 200  $\mu$ m (upper) and 50  $\mu$ m (lower)). The data are presented as the mean  $\pm$  SD. \* $P$ <0.05.

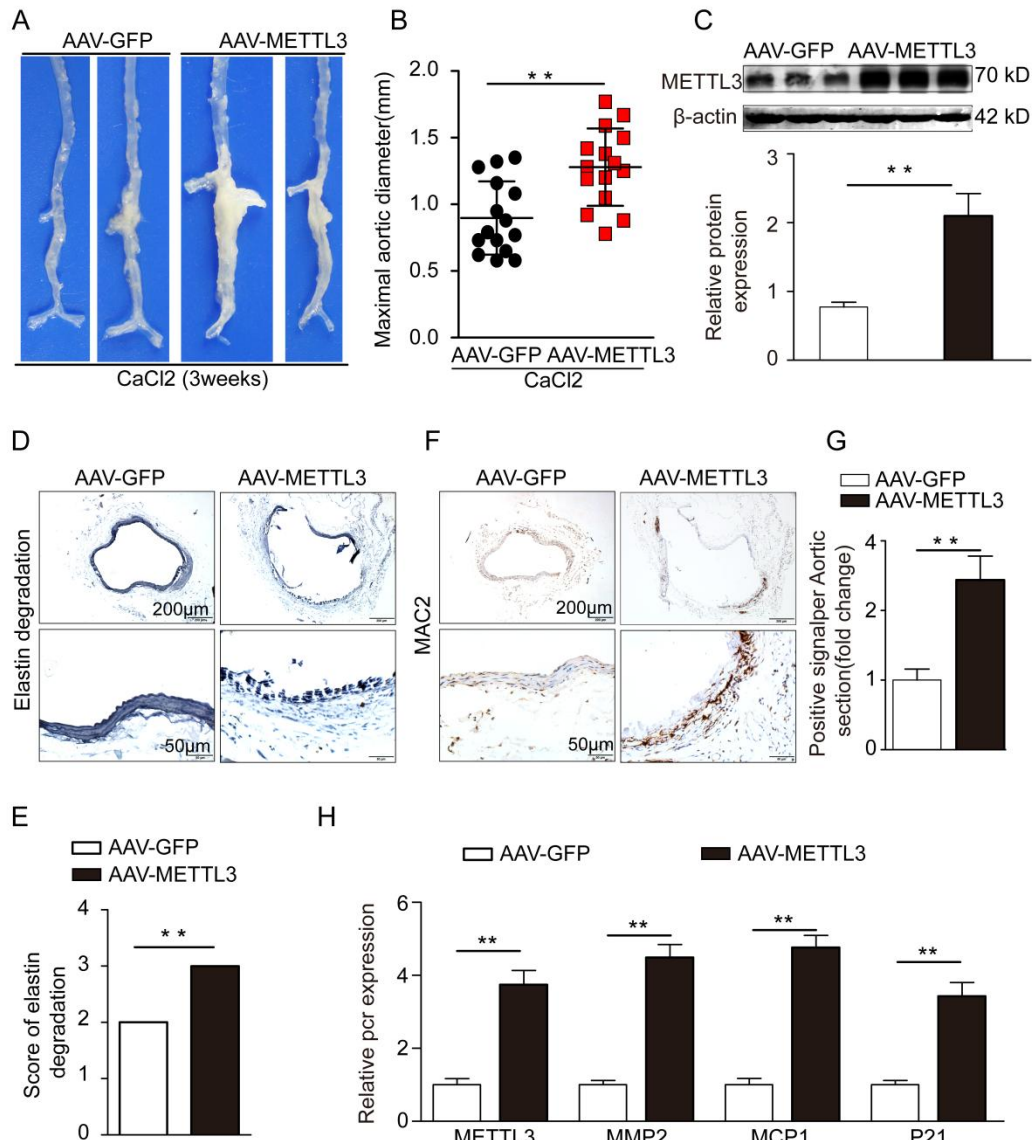

Online Figure 7

**Online Figure 7.** METTL3 overexpression exacerbates  $\text{CaCl}_2$ -induced AAA formation. C57BL/6J mice were injected with AAV-GFP or AAV-METTL3, and their infrarenal aortas were then treated with  $\text{CaCl}_2$  for 15 min. After three weeks, the mice were sacrificed and used for analysis. A, Representative images showing C57BL/6J mouse infrarenal aortas treated with  $\text{CaCl}_2$ . B, Maximal diameters of infrarenal aortas from  $\text{CaCl}_2$ -induced C57BL/6J mice. C, Representative western blots and statistical analysis of aortic METTL3 in  $\text{CaCl}_2$ -treated C57BL/6J mice. D and E, Representative elastin staining and statistical analysis of elastin degradation scores in the two groups of mice. F and G, Representative immunohistochemical staining (F) and statistical analysis (G) of MAC2 in aortas from the two groups of mice (n=4 per group). G and H, mRNA levels of aortic METTL3, MCP-1, MMP-2 and P21 in  $\text{CaCl}_2$ -treated C57BL/6J mice. The data are presented as the mean  $\pm$  SD. \* $P < 0.05$ , \*\* $P < 0.01$ .

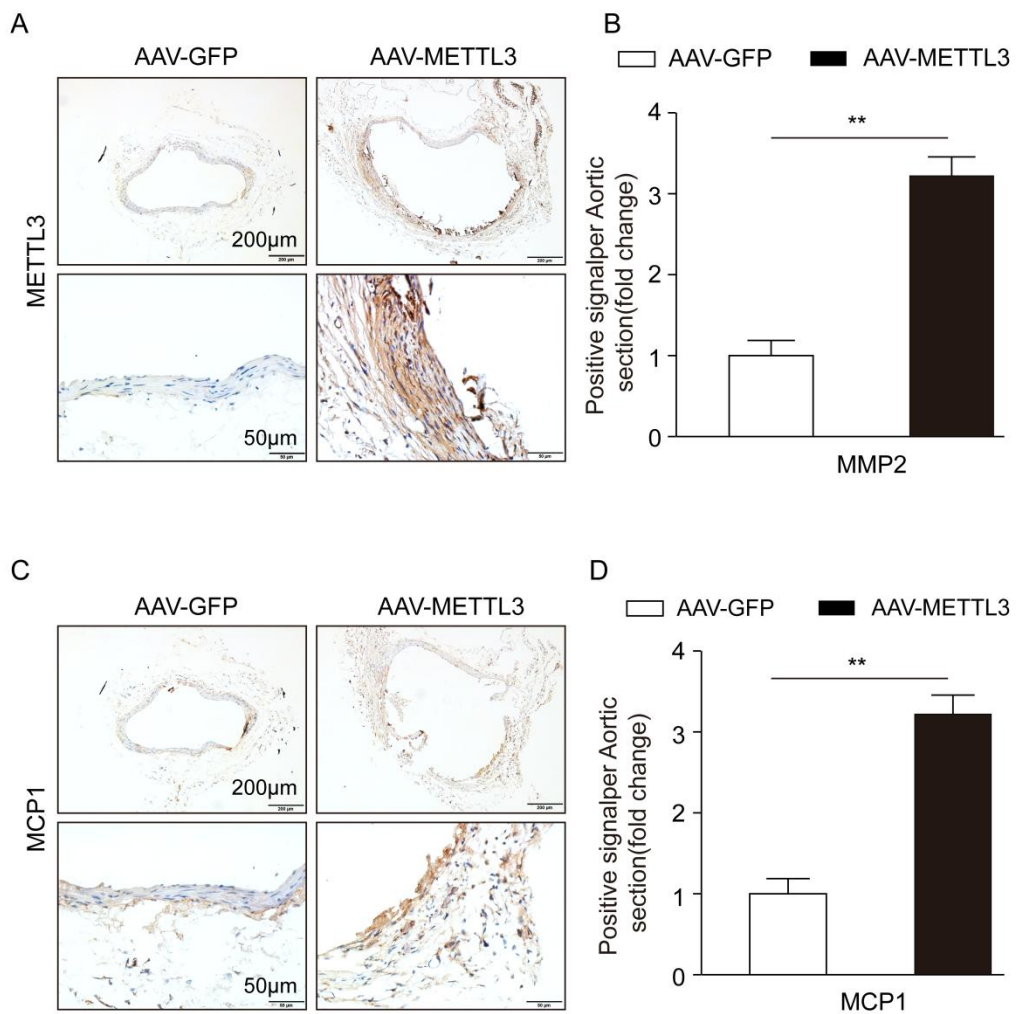

Online Figure 8

**Online Figure 8.** METTL3 overexpression increases vascular MMP2 and MCP1 expression. A to D, Immunofluorescent staining for MMP2 (A,B) and MCP1 (C,D) (scale bars, 200 µm (upper) and 50 µm (lower)). The data are presented as the mean ± SD. \* $P < 0.05$ , \*\* $P < 0.01$ .

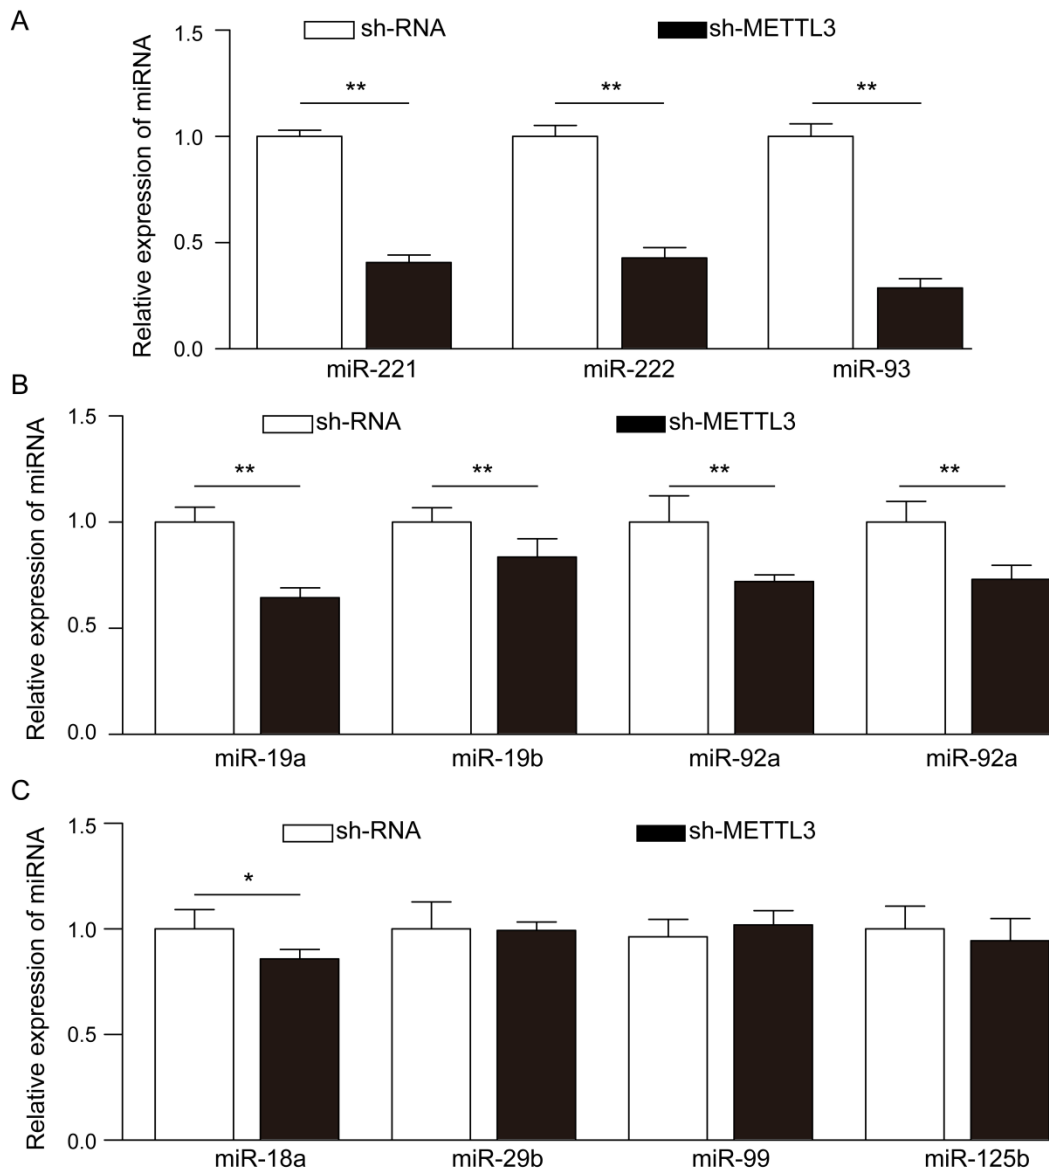

Online Figure 9

**Online Figure 9.** Expression of miRNAs in METTL3-depleted SMCs. A, miR-34a, miR-221, miR-222 and miR-93 were quantified by qRT-PCR upon METTL3 depletion in SMCs. B, miR-19a, miR-19b, miR-92a and miR-20a were quantified by qRT-PCR upon METTL3 depletion in SMCs. C, miR-18a, miR-29b, miR-99 and miR-125b were quantified by qRT-PCR upon METTL3 depletion in SMCs. Abbreviations: siRNA, small interfering fragment control; sh-METTL3, METTL3 knockdown. The data are presented as the mean  $\pm$  SD. \* $P$ <0.05, \*\* $P$ <0.01.

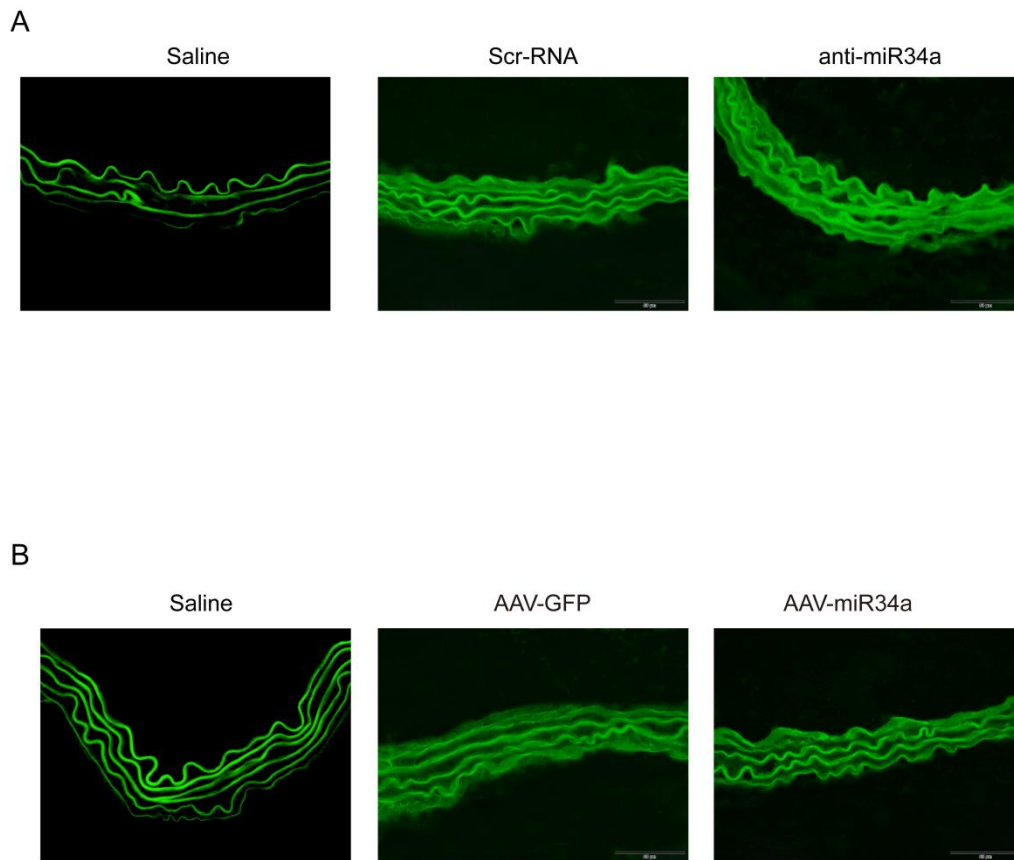

Online Figure 10

**Online Figure 10.** Confirmation of the transfection efficiency of anti-miR34a, AAV-miR34a, and control sequences in the supracrenal aortas of mice. A and B, Representative immunofluorescent staining of virus-borne green fluorescent protein (GFP) in the aortas of mice from the different virus-mediated groups and the saline group (scale bar, 50  $\mu$ m).

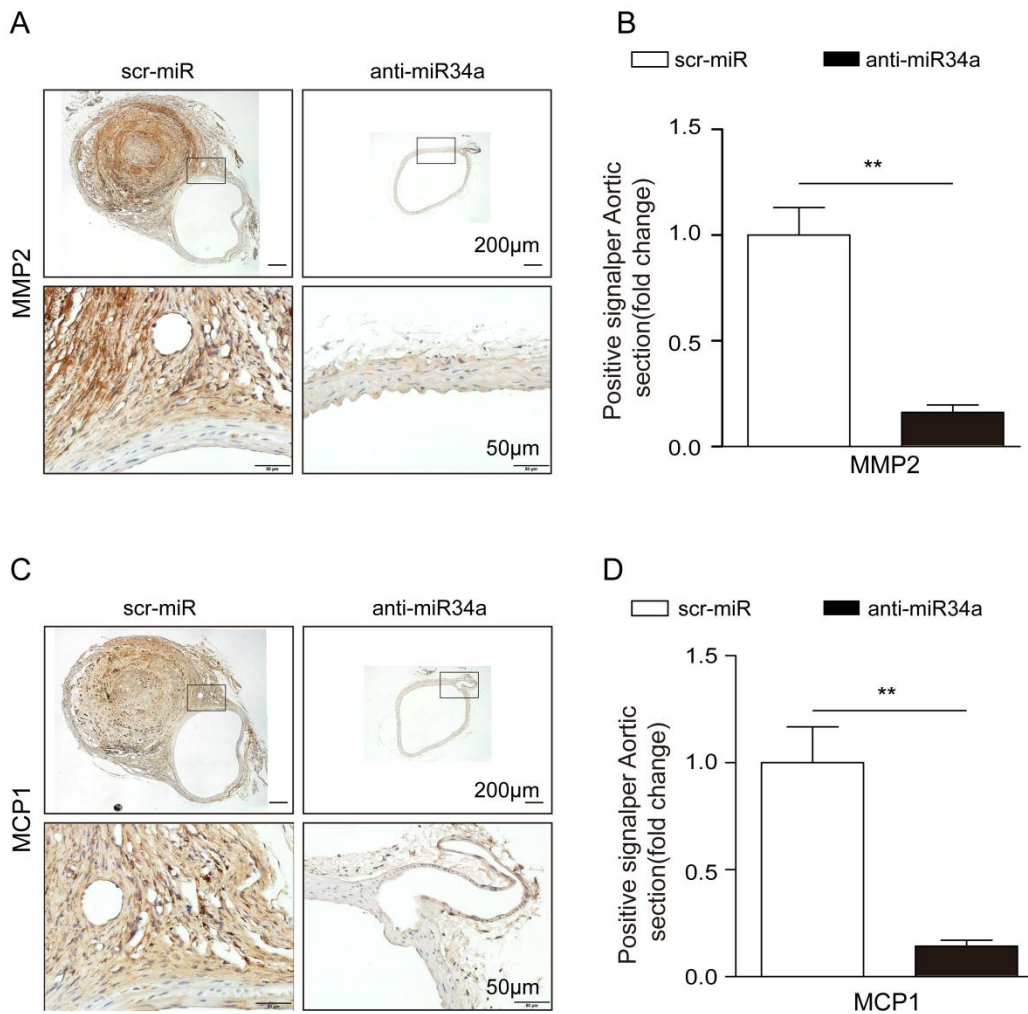

Online Figure 11

**Online Figure 11.** miR34a knockdown inhibits vascular MMP2 and MCP1 expression. A to C, Immunofluorescent staining for MMP2 (A,B) and MCP1 (C,D) (scale bars, 200  $\mu\text{m}$  (upper) and 50  $\mu\text{m}$  (lower)). The data are presented as the mean  $\pm$  SD. \* $P < 0.05$ , \*\* $P < 0.01$ .

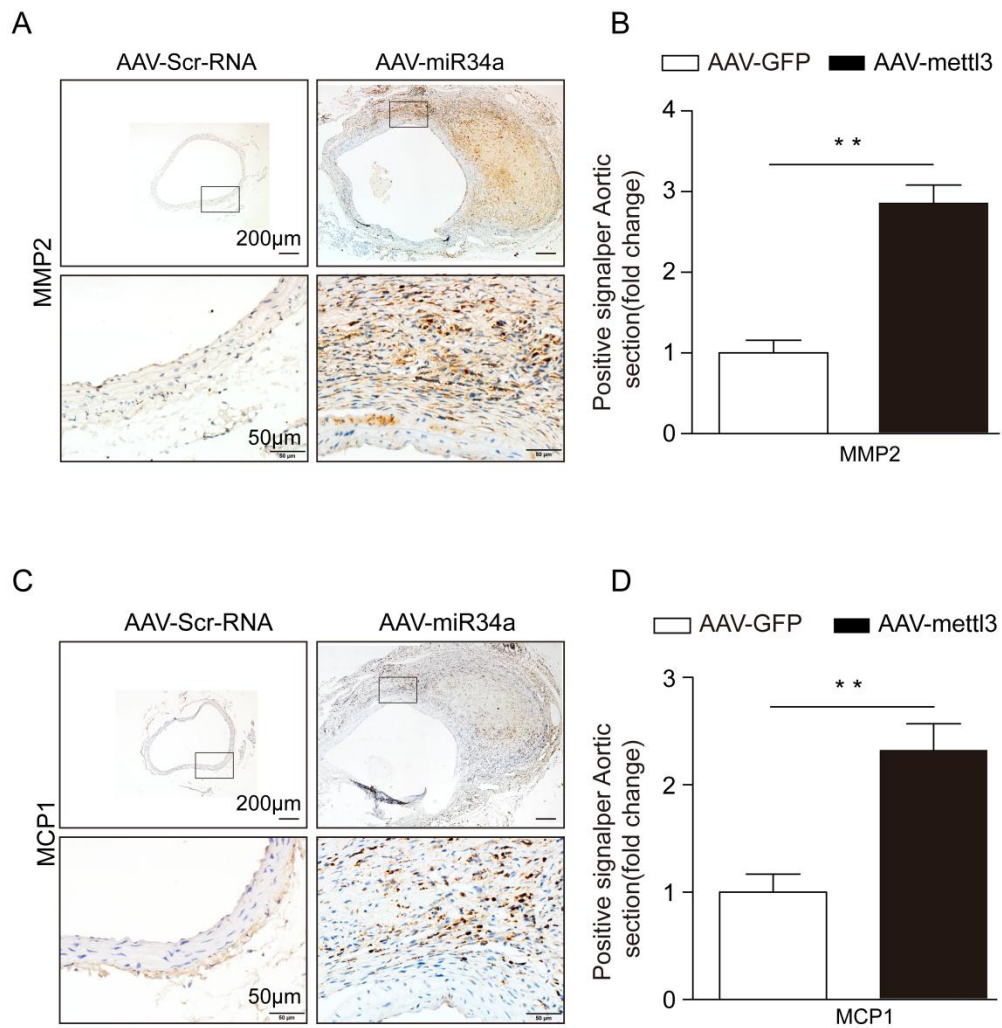

Online Figure 12

**Online Figure 12.** miR34a overexpression increases vascular MMP2 and MCP1 expression. A to D, Immunofluorescent staining for MMP2 (A,B) and MCP1 (C,D) (scale bars, 200 μm (upper) and 50 μm (lower)). The data are presented as the mean ± SD. \* $P < 0.05$ , \*\* $P < 0.01$ .



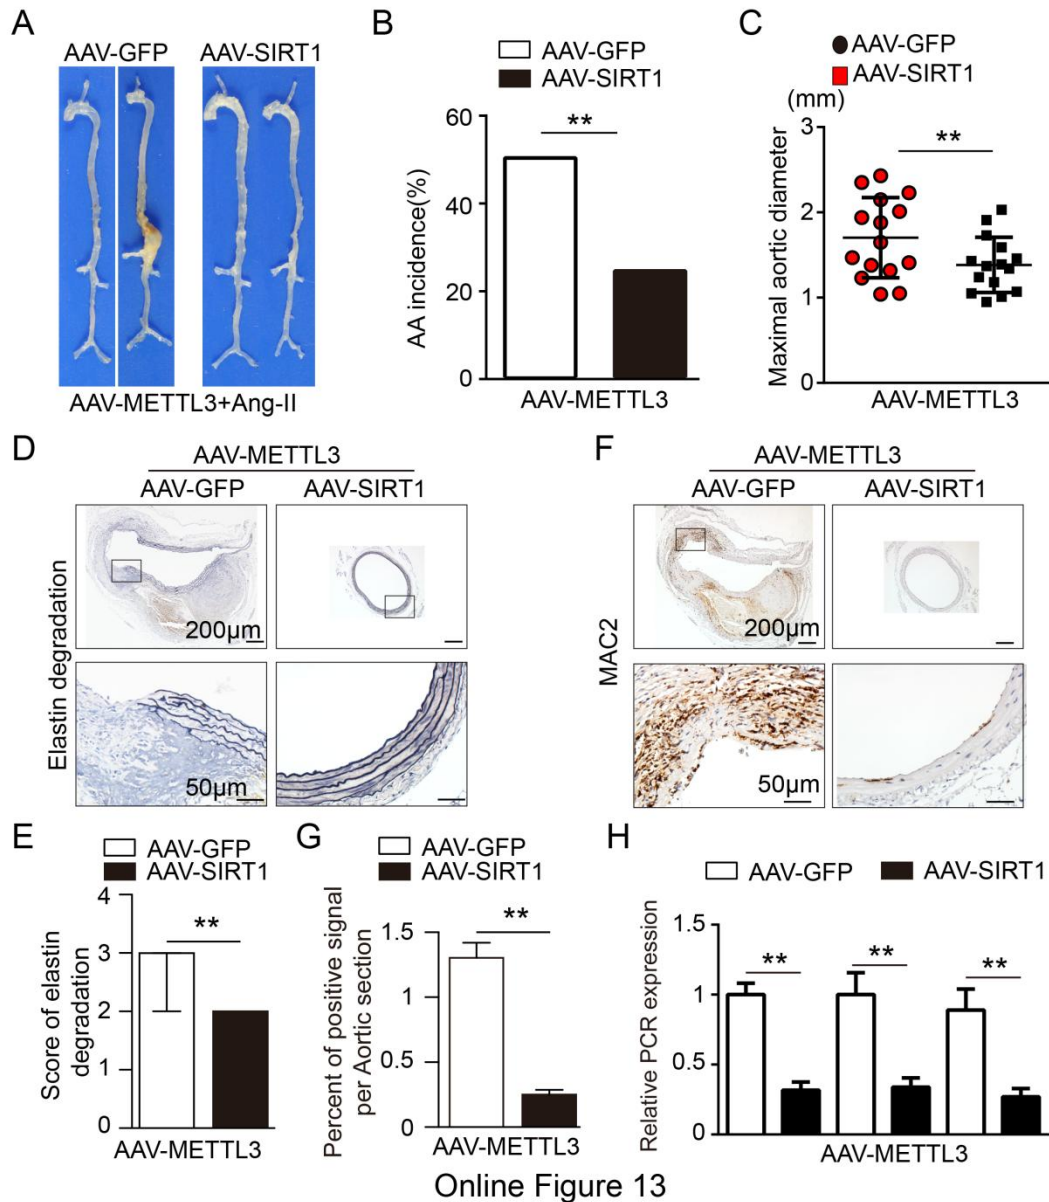

**Online Figure 13.** METTL3 overexpression promotes AAA via miR34a/SIRT1. **A**, Representative photographs of the macroscopic features of AAAs in AAV-METTL3 transfected Ang II-infused C57BL/6J mice in the AAV-GFP group or the AAV-SIRT1 group. **B**, Statistical analysis of AAA incidence in AAV-METTL3 transfected Ang II-infused C57BL/6J mice. **C**, Maximal aortic diameters in the AAV-METTL3-transfected Ang II-infused C57BL/6J mice in the two groups. **D** and **E**, Representative elastin staining and elastin degradation scores in suprarenal aortas from AAV-METTL3 transfected Ang II-infused C57BL/6J mice. The data are presented as the medians and quartiles. **\*\*P**<0.01. **F** and **G**, Representative immunostaining for MAC2 (scale bars, 200 and 50 μm) and the corresponding densitometric analysis (n=3). **H**, Relative mRNA expression of MMP2, MCP1 and P21 in AAV-METTL3 transfected Ang II-infused C57BL/6J mouse aortas (n=4). The data are presented as the mean ± SD. \***P**<0.05, **\*\*P**<0.01.

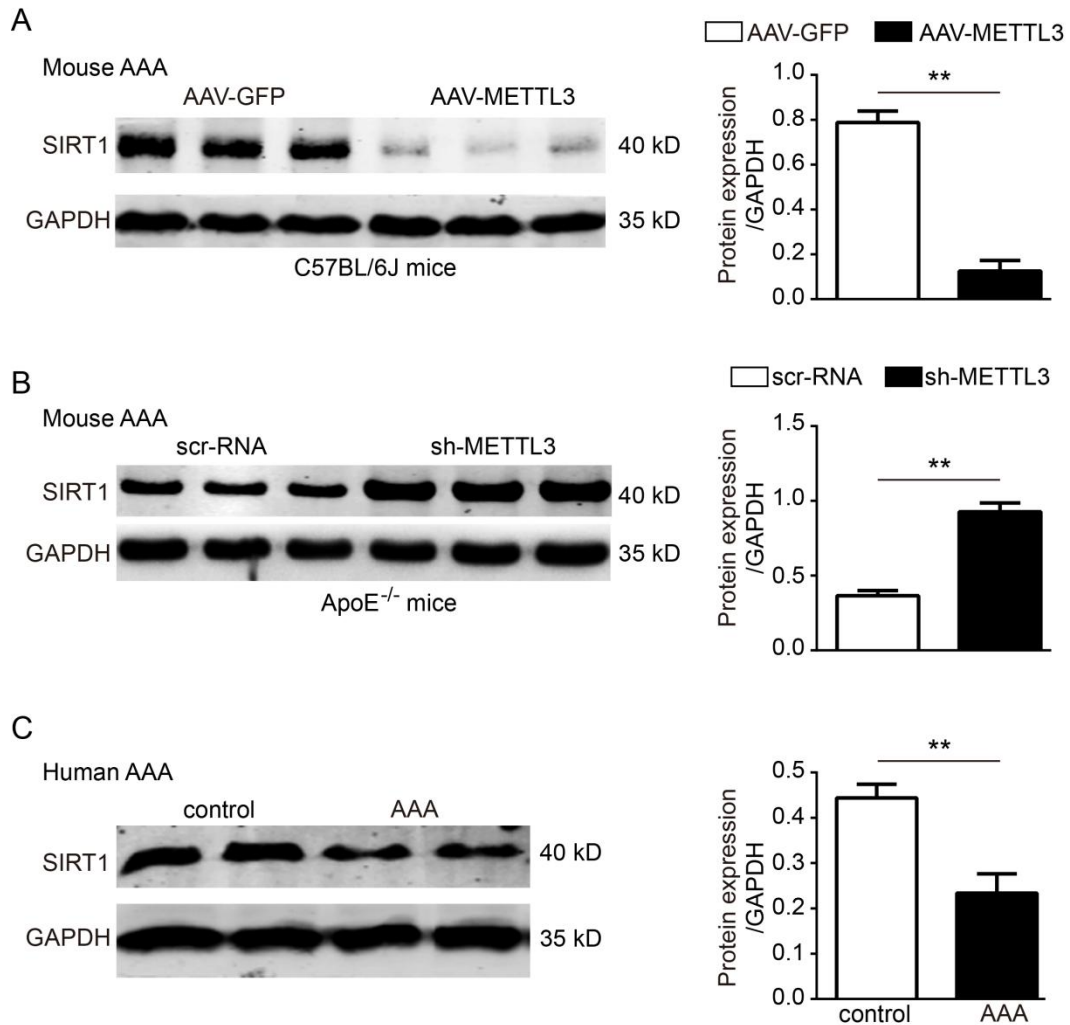

**Online Figure 14.** SIRT1 was substantially upregulated in METTL3 knockdown samples but downregulated in METTL3 overexpression samples. A, Western blot analysis of SIRT1 in Ang II-infused C57BL/6J mice in the AAV-GFP group or the AAV-METTL3 group (n=4). B, Western blot analysis of SIRT1 in Ang II-infused male ApoE<sup>-/-</sup> mice in the scr-RNA group or the sh-METTL3 group (n=4). C, Western blot analysis of SIRT1 in human AAA and adjacent nonaneurysmal aortic samples. \*\*P<0.01.

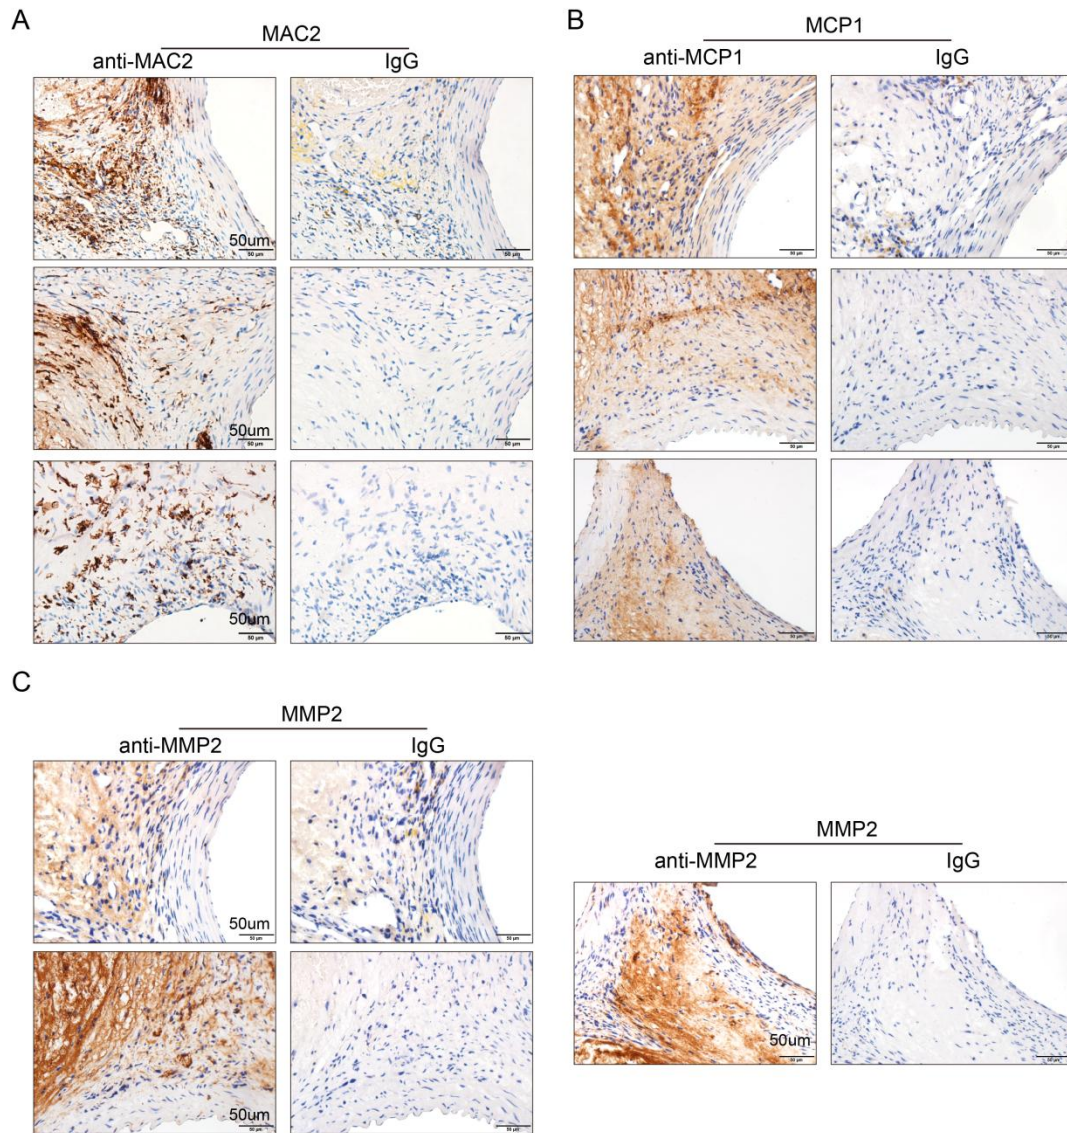

Online Figure 15

**Online Figure 15.** Negative control experiments confirming the specificity of antibody binding in the immunohistochemistry results. A to C, Representative images of immunohistochemical staining for MAC2 (A), MCP1 (B), and MMP2 (C) (scale bars, 50 µm).

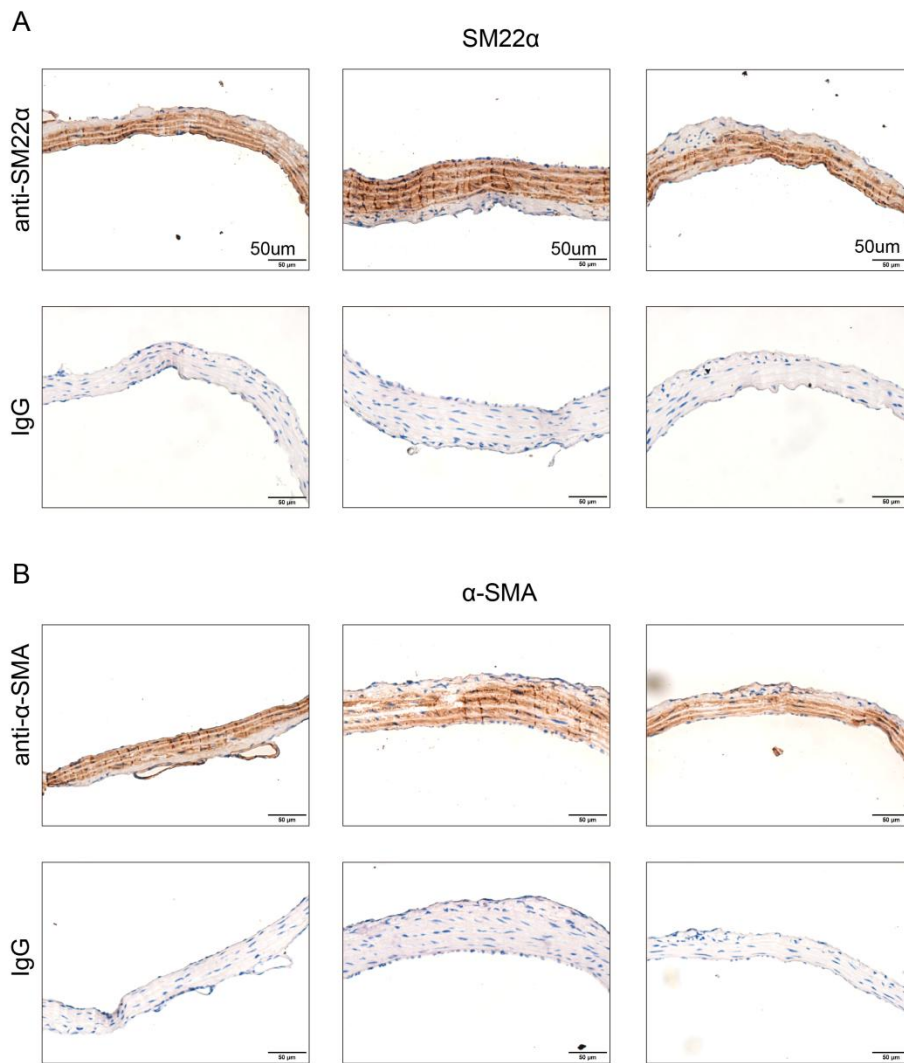

Online Figure 16

**Online Figure 16.** Negative control experiments confirming the specificity of antibody binding in the immunohistochemistry results. A and B, Representative images of immunohistochemical staining for SM22 $\alpha$  (A) and  $\alpha$ -SMA (B) (scale bars, 50  $\mu$ m).

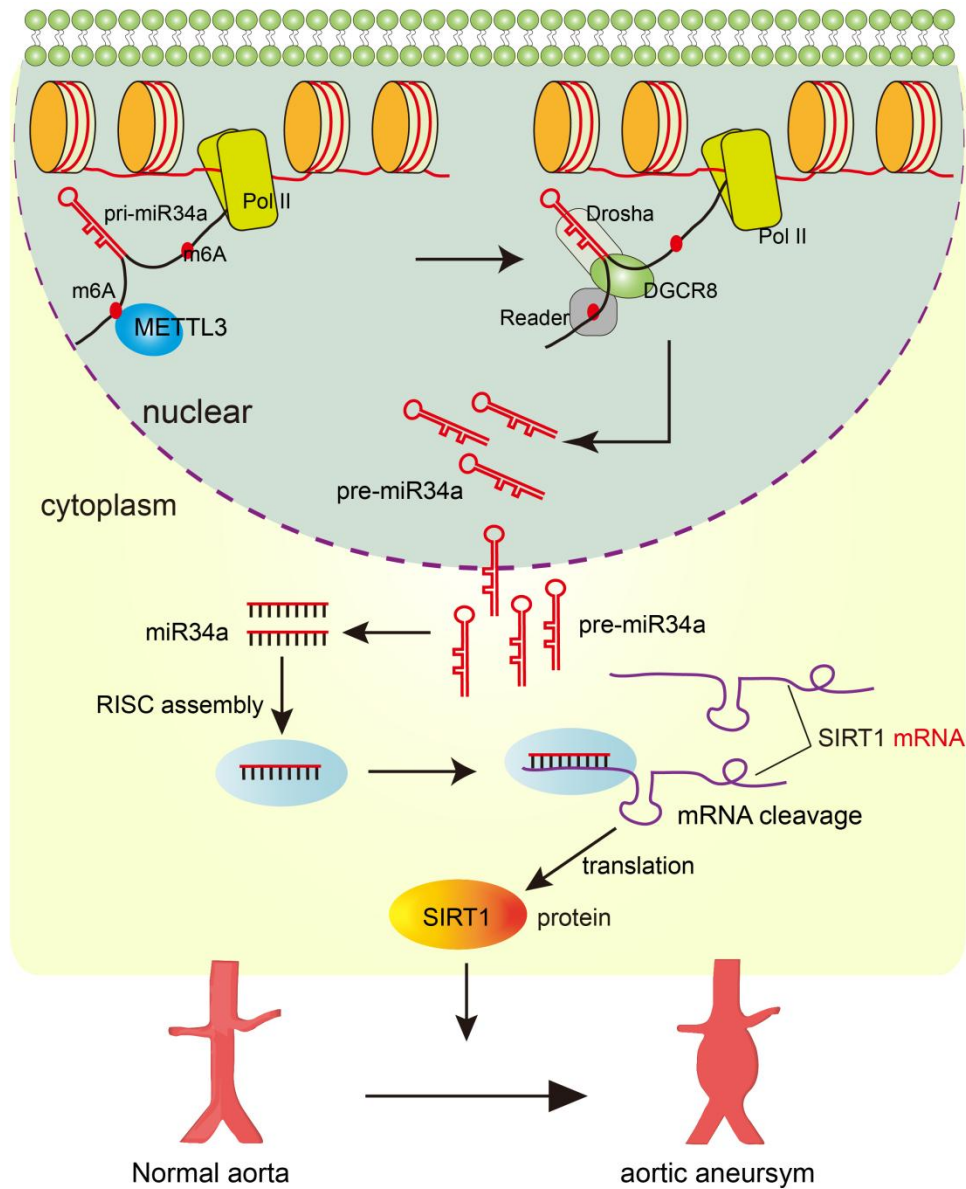

Online Figure 17

**Online Figure 17.** Working model of the role of METTL3 in AAA formation. METTL3 increases m<sup>6</sup>A modification of pri-miR34a, which favors the binding of pri-miR34a to DGCR8. METTL3 promotes mature miR34a expression in a DGCR8-dependent manner, which leads to AAA formation through inhibition of SIRT1 expression.

## Major Resources Tables

**Table 1**

**Patient clinical information ( n=5 )**

|                         |                 |
|-------------------------|-----------------|
| characteristics         | AAA             |
| Ever-smoker             | 100%            |
| hypertensive            | 100%            |
| hyperlipidemia          | 100%            |
| coronary artery disease | 80%             |
| gender                  | male            |
| average age             | 64.2±4.44 years |

**Table 2**

**Specific siRNAs against METTL3, miR34a and their nonspecific controls (NCs)**

|                                                                |
|----------------------------------------------------------------|
| siMETTL3,sense:GCAUUGGUGCUGUGUUA AATTUUUAACACAGCACCAAU<br>GCTT |
| siNC,sense: UUCUCCGAACGUGUCACGUTTACGUGACACGU UCGGAGAATT        |
| Anti-miR-34a,sense: ACAACCAGCTAAGACACTGCCA                     |
| Scr-miR, sense: TTCTCCGAACGTGTCACGT                            |

**Table 3**

Antibodies for immunohistochemistry analysis

| name               | Vendor or Source | Catalog # |
|--------------------|------------------|-----------|
| anti-SM22 $\alpha$ | Abcam            | Ab170902  |
| anti- $\alpha$ SMA | Abcam            | ab32575   |
| anti-MMP2          | Abcam            | ab37150   |
| anti-MCP1          | Thermo Fisher    | PA5-34505 |
| anti-MAC2          | Abcam            | ab76245   |
| anti-IgG           | Abcam            | ab172730  |

**Table 4**

Antibodies for immunofluorescent analysis

| name                | Vendor or Source | Catalog # |
|---------------------|------------------|-----------|
| anti- METTL3        | Abcam            | ab195352  |
| anti- SM22 $\alpha$ | Abcam            | ab10135   |
| Alexa Fluor 488     | Abcam            | ab150129  |
| Alexa Fluor 594     | Abcam            | ab150088  |

**Table 5**

Antibodies for western blots

| name                 | Vendor or Source | Catalog # |
|----------------------|------------------|-----------|
| anti- METTL3         | Abcam            | ab195352  |
| anti- MCP1           | Thermo Fisher    | PA5-34505 |
| anti- MMP2           | Abcam            | ab37150   |
| anti- P21            | Abcam            | Ab109119  |
| anti- SM22 $\alpha$  | Abcam            | ab155272  |
| anti- SIRT1          | Abcam            | ab110304  |
| anti- $\beta$ -actin | Abcam            | ab5694    |
| anti-GAPDH           | Abcam            | Ab9485    |

**Table 6**

Quantitative real-time PCR

| Primer                  | Sequence (5'-3')        |
|-------------------------|-------------------------|
| miR34AHG _forward       | TGGCAGTGTCTTAGCTGGTTGT  |
| miR34AHG _reverse       | TGGCGTCTCCCCTGGTCT      |
| miR34a _forward         | TGGCAGTGTCTTAGCTGGTTGT  |
| miR34a _reverse         | AGTGCAGGGTCCGAGGTATT    |
| U6 _forward             | CTCGCTTCGGCAGCACA       |
| U6 _reverse             | AACGCTTCACGAATTTGCGT    |
| METTL3 _forward         | TTCATCTTGGCTCTATCCGGC   |
| METTL3 _reverse         | GCACGGGACTATCACTACGG    |
| METTL14 _forward        | CCATAATGATTACTGCCAAC    |
| METTL14 _reverse        | GTCAAAGGCTTCTATGTCTG    |
| WTAP _forward           | GCAACCAAAGAGCAGGAGAT    |
| WTAP _reverse           | CTTCCAGGCACTCAGTTCAT    |
| YTHDF2 _forward         | TAGCCAGCTACAAGCACACC    |
| YTHDF2 _reverse         | TTTCCCACGACCTTGACGTT    |
| FTO _forward            | GAGCAGCCTACAACGTGACT    |
| FTO _reverse            | GAAGCTGGACTCGTCCTCAC    |
| KIAA1429 _forward       | GCTGATGACTGCAATCTGCG    |
| KIAA1429 _reverse       | CTCCACAACAGCCCATAGCA    |
| METTL4 _forward         | TTCGAAGTTAATCCAAGAAGG T |
| METTL4 _reverse         | CGTTTGAAGCTCCATTTCAT    |
| ALKBH5 _forward         | TGTGCTCAGTGGGTATGCTG    |
| ALKBH5 _reverse         | CTGACAGGCGATCTGAAGCA    |
| MMP2 _forward           | ACCAACACTGGGACCTGTAC    |
| MMP2 _reverse           | CGAAGAACACAGCCTTCTCCT   |
| MMP9 _forward           | GCGTGTCTGGAGATTCGACTTG  |
| MMP9 _reverse           | ACTGCAGGAGGTCGTAGGTCAC  |
| MCP1 _forward           | ACCTGCTGCTACTCATTAC     |
| MCP1 _reverse           | CATTCAAAGGTGCTGAAGAC    |
| $\beta$ -actin _forward | GGCTGTATTCCTCCATCG      |
| $\beta$ -actin _reverse | CCAGTTGGTAACAATGCCATGT  |

**Table 7**

**(DGCR8) RIP-specific primer pairs for the miR34AHG gene**

|                                          |
|------------------------------------------|
| 5'- TGGCAGTGTCTTAGCTGGTTGT -3' (forward) |
| 5'- TGGCGTCTCCCACTGGTCT -3' (reverse)    |

**Table 8**

**(m<sup>6</sup>A) RIP-specific primer pairs for the miR34AHG gene**

|                                              |
|----------------------------------------------|
| Site 1: 5'- ATGCCAACTTTGAGGCCA-3' (forward)  |
| Site 1: 5'- CTCTCCATCCTCCGGTGA-3' (reverse)  |
| Site 2 : 5'- ATGCCAACTTTGAGGCCA-3' (forward) |
| Site 2 : 5'- AAGACCTGGGGAAGCCAC-3' (reverse) |
| Site 3 : 5'-AAGAGGTGACGCCAAACG-3' (forward)  |
| Site 3 : 5'-CCTGGCCTGTGTGAAAGG-3' (reverse)  |
